# Supplementary material for: Identification of sense and antisense transcripts regulated by drought in sugarcane
Source: PubMed Central journal article supplement (PMC3369129; doi:10.1007/s11103-012-9922-1), 2012-05-19
Supplement: 11103_2012_9922_MOESM1_ESM.pdf [file 11103_2012_9922_MOESM1_ESM.pdf]

**Supplementary Table 1** - Scheme of microarray hybridizations.

|      | Cy 3      |     | Cy 5      |
|------|-----------|-----|-----------|
| 24h  | Contr. R1 | vs. | Exp. R1   |
|      | Exp. R2   | vs. | Contr. R2 |
| 72h  | Contr. R1 | vs. | Exp. R1   |
|      | Exp. R2   | vs. | Contr. R2 |
| 120h | Contr. R1 | vs. | Exp. R1   |
|      | Exp. R2   | vs. | Contr. R2 |

Cy3 and Cy5: dyes. Contr.: control irrigated sample. Exp.: experimental drought sample. R1: biological replicate 1. R2: biological replicate 2
