# Supplementary material for: Identification of sense and antisense transcripts regulated by drought in sugarcane
Source: PubMed Central journal article supplement (PMC3369129; doi:10.1007/s11103-012-9922-1), 2012-05-19
Supplement: 11103_2012_9922_MOESM2_ESM.pdf [file 11103_2012_9922_MOESM2_ESM.pdf]

| <b>Functional Category</b>        | <b>Examples of Included Processes</b>                                                                                                                                                                                                                                                                                                                                                                                                                                                                                                                                                               |
|-----------------------------------|-----------------------------------------------------------------------------------------------------------------------------------------------------------------------------------------------------------------------------------------------------------------------------------------------------------------------------------------------------------------------------------------------------------------------------------------------------------------------------------------------------------------------------------------------------------------------------------------------------|
| Carbohydrate metabolism           | Glycolysis<br>Krebs Cycle<br>Gluconeogenesis<br>Pentose Phosphate pathway<br>Synthesis and degradation of starch<br>Fructose/Mannose/Galactose<br>Calvin Cycle<br>Inositol metabolism                                                                                                                                                                                                                                                                                                                                                                                                               |
| Light Harvesting                  | Photochemical reaction centers (PSI e PSII)                                                                                                                                                                                                                                                                                                                                                                                                                                                                                                                                                         |
| Oxidative phosphorylation         |                                                                                                                                                                                                                                                                                                                                                                                                                                                                                                                                                                                                     |
| Lipid metabolism                  | Fatty acid biosynthesis<br>Fatty acid elongation in mitochondria<br>Fatty acid metabolism<br>Synthesis and degradation of ketone bodies<br>Steroid hormone biosynthesis<br>Glycerolipid metabolism<br>Glycerophospholipid metabolism<br>Ether lipid metabolism<br>Sphingolipid metabolism<br>Arachidonic acid metabolism<br>Alpha-Linolenic acid metabolism<br>Biosynthesis of unsaturated fatty acids                                                                                                                                                                                              |
| Nucleotide metabolism             | Purine metabolism<br>Pyrimidine metabolism                                                                                                                                                                                                                                                                                                                                                                                                                                                                                                                                                          |
| AminoAcid and nitrogen metabolism | Alanine, aspartate and glutamate metabolism<br>Glycine, serine and threonine metabolism<br>Cysteine and methionine metabolism<br>Valine, leucine and isoleucine degradation<br>Valine, leucine and isoleucine biosynthesis<br>Lysine biosynthesis<br>Lysine degradation<br>Arginine and proline metabolism<br>Histidine metabolism<br>Tyrosine metabolism<br>Phenylalanine metabolism<br>Tryptophan metabolism<br>Phenylalanine, tyrosine and tryptophan biosynthesis<br>beta-Alanine metabolism<br>Taurine and hypotaurine metabolism<br>Selenoamino acid metabolism<br>Cyanoamino acid metabolism |

|                                       |                                                       |                              |
|---------------------------------------|-------------------------------------------------------|------------------------------|
|                                       | Glutathione metabolism                                |                              |
|                                       | Nitrogen assimilation pathway                         |                              |
| Cell wall metabolism                  | N-Glycan biosynthesis                                 |                              |
|                                       | Glycosylphosphatidylinositol(GPI)-anchor biosynthesis |                              |
|                                       | Glycosphingolipid biosynthesis - globo series         |                              |
|                                       | Glycosphingolipid biosynthesis - ganglio series       |                              |
|                                       | Other glycan degradation                              |                              |
|                                       | Lignin metabolism                                     |                              |
|                                       | Suberin metabolism                                    |                              |
|                                       | Phenylpropanoid biosynthesis                          |                              |
|                                       | Structural proteins of the cell wall                  |                              |
|                                       | Cell wall growth/extension                            |                              |
|                                       | Cell wall differentiation                             |                              |
| Vitamin and Cofactor metabolism       | Thiamine metabolism                                   |                              |
|                                       | Riboflavin metabolism                                 |                              |
|                                       | Vitamin B6 metabolism                                 |                              |
|                                       | Nicotinate and nicotinamide metabolism                |                              |
|                                       | Pantothenate and CoA biosynthesis                     |                              |
|                                       | Biotin metabolism                                     |                              |
|                                       | Lipoic acid metabolism                                |                              |
|                                       | Folate biosynthesis                                   |                              |
|                                       | One carbon pool by folate                             |                              |
|                                       | Retinol metabolism                                    |                              |
|                                       | Ubiquinone and other terpenoid-quinone biosynthesis   |                              |
| Phorphyrin and chlorophyll metabolism |                                                       |                              |
| Hormone biosynthesis                  | Auxin synthesis and degradation                       | Tryptophane metabolism       |
|                                       | ABA synthesis and degradation                         | Carotenoid byosynthesis      |
|                                       | Ethylene synthesis and degradation                    |                              |
|                                       | Cytokinin synthesis and degradation                   | Zeatin biosynthesis          |
|                                       | Brassinosteroid synthesis and degradation             | Brassinosteroid biosynthesis |
|                                       | Gibberellin synthesis and degradation                 | Diterpenoid biosynthesis     |
|                                       | Salicylic acid synthesis and degradation              |                              |
|                                       | Methyl jasmonate                                      |                              |
| Carotenoid Metabolism                 |                                                       |                              |
| Other terpenoids metabolism           | Terpenoid backbone biosynthesis                       |                              |
|                                       | Monoterpenoid biosynthesis                            |                              |
|                                       | Sesquiterpenoid biosynthesis                          |                              |
|                                       | Limonene and pinene degradation                       |                              |
|                                       | Polyketide sugar unit biosynthesis                    |                              |
| Flavonoid and anthocyanin metabolism  | Isoflavonoid biosynthesis                             |                              |
|                                       | Anthocyanin biosynthesis                              |                              |
|                                       | Flavonoid biosynthesis                                |                              |

|                                             |                                                                                                                                                                                                                                                                                                                                                                                                                                                                                  |                                                                                                                                                                                                                                                                                                                                                |
|---------------------------------------------|----------------------------------------------------------------------------------------------------------------------------------------------------------------------------------------------------------------------------------------------------------------------------------------------------------------------------------------------------------------------------------------------------------------------------------------------------------------------------------|------------------------------------------------------------------------------------------------------------------------------------------------------------------------------------------------------------------------------------------------------------------------------------------------------------------------------------------------|
| Biosynthesis of other Secondary Metabolites | <ul style="list-style-type: none"> <li>Stilbenoid, diarylheptanoid and gingerol biosynthesis</li> <li>Flavone and flavonol biosynthesis</li> <li>Indole alkaloid biosynthesis</li> <li>Isoquinoline alkaloid biosynthesis</li> <li>Tropane, piperidine and pyridine alkaloid biosynthesis</li> <li>Acridone alkaloid biosynthesis</li> <li>Caffeine metabolism</li> <li>Betalain biosynthesis</li> <li>Glucosinolate biosynthesis</li> <li>Benzoxazinoid biosynthesis</li> </ul> |                                                                                                                                                                                                                                                                                                                                                |
| Sulphur metabolism                          |                                                                                                                                                                                                                                                                                                                                                                                                                                                                                  |                                                                                                                                                                                                                                                                                                                                                |
| DNA metabolism                              | <ul style="list-style-type: none"> <li>Replication/repair</li> <li>Histones and associated proteins</li> <li>Methylation and acetylation</li> <li>Telomere maintenance</li> </ul>                                                                                                                                                                                                                                                                                                |                                                                                                                                                                                                                                                                                                                                                |
| RNA metabolism                              | <ul style="list-style-type: none"> <li>Transcription</li> <li>RNA binding proteins</li> </ul>                                                                                                                                                                                                                                                                                                                                                                                    |                                                                                                                                                                                                                                                                                                                                                |
| Protein Metabolism                          | <ul style="list-style-type: none"> <li>Translation</li> <li>Chaperones</li> <li>Degradation</li> <li>Modification</li> </ul>                                                                                                                                                                                                                                                                                                                                                     |                                                                                                                                                                                                                                                                                                                                                |
| Signal Transduction                         | <ul style="list-style-type: none"> <li>Biotic stress signal transduction</li> <li>Abiotic stress signal transduction</li> <li>Internal signal transduction</li> <li>Signal transduction - general</li> </ul>                                                                                                                                                                                                                                                                     | <ul style="list-style-type: none"> <li>ABA</li> <li>Drought</li> <li>Cold</li> <li>Light</li> <li>Heat</li> <li>Jasmonic acid</li> <li>Salicylates</li> <li>Auxin</li> <li>Cytokinin</li> <li>Ethylene</li> <li>Brassinosteroid</li> <li>Some Kinases and phosphates</li> <li>Some Transcription Factors</li> <li>Calcium signaling</li> </ul> |
| Cell cycle                                  | <ul style="list-style-type: none"> <li>Meiosis</li> <li>Mitosis</li> <li>Cell cycle control</li> </ul>                                                                                                                                                                                                                                                                                                                                                                           |                                                                                                                                                                                                                                                                                                                                                |
| Circadian Clock                             |                                                                                                                                                                                                                                                                                                                                                                                                                                                                                  |                                                                                                                                                                                                                                                                                                                                                |
| Development                                 | <ul style="list-style-type: none"> <li>Differentiation</li> <li>Speciation</li> </ul>                                                                                                                                                                                                                                                                                                                                                                                            |                                                                                                                                                                                                                                                                                                                                                |

Transporters

Simporters

Antiporters

Aquaporin

Membrane transporters

Pumps

Channels

Carriers

Senescence and cell death

Cytoskeleton and vesicle trafficking

Secretory pathways

Endocytic pathway

Protein sorting

Pathogen Resistance

Redox Metabolism

Transposable element-related

Transposase

Reverse transcriptase

Others

Unknown

---
