# Supplementary material for: Identification of sense and antisense transcripts regulated by drought in sugarcane
Source: PubMed Central journal article supplement (PMC3369129; doi:10.1007/s11103-012-9922-1), 2012-05-19
Supplement: 11103_2012_9922_MOESM3_ESM.pdf [file 11103_2012_9922_MOESM3_ESM.pdf]

**IDENTIFICATION OF SENSE AND ANTISENSE TRANSCRIPTS REGULATED BY DROUGHT IN SUGARCANE**

**Plant Molecular Biology**

Carolina Gimiliani Lembke<sup>1</sup>, Milton Yutaka Nishiyama Jr<sup>1</sup>, Paloma Mieko Sato<sup>1</sup>, Rodrigo Fandiño de Andrade<sup>1</sup>, Glauca Mendes Souza<sup>1#</sup>

<sup>1</sup>Laboratório de Transdução de Sinal, Departamento de Bioquímica, Instituto de Química, Universidade de São Paulo.

#Corresponding author e-mail address: glmsouza@iq.usp.br

| transcript_name | probe_name         | function_category    | structural_category | category                | sub_category1                                                                                                                                                                     | sub_category2                                                                                                                                                                                                               | 24h drought | 72h drought            | 120h drought           | Up freq. | Down freq. | Inside freq. | Total freq. |
|-----------------|--------------------|----------------------|---------------------|-------------------------|-----------------------------------------------------------------------------------------------------------------------------------------------------------------------------------|-----------------------------------------------------------------------------------------------------------------------------------------------------------------------------------------------------------------------------|-------------|------------------------|------------------------|----------|------------|--------------|-------------|
| SCEQLR1093E06.g | GS1_SS_06392_03925 | AminoAcid metabolism | aminotransferase    |                         | Alanine-glyoxylate aminotransferase 2 homolog 3, mitochondrial; Beta-alanine-pyruvate aminotransferase 3;                                                                         | unknown [Zea mays]                                                                                                                                                                                                          |             |                        | up (4.5300,5.2100)     | 1        | 0          | 0            | 1           |
| SCRFLR1034F03.g | GS1_SS_08899_20441 | AminoAcid metabolism | aminotransferase    | Amino acid metabolism   | alanine-glyoxylate aminotransferase                                                                                                                                               | hypothetical protein OsJ_018143 [Oryza sativa (japonica cultivar-group)]                                                                                                                                                    |             |                        | up (4.7400,5.7300)     | 1        | 0          | 0            | 1           |
| SCJLLR1011C10.g | GS1_SS_00118_18846 | AminoAcid metabolism | aminotransferase    | Carbohydrate metabolism | Carbon fixation                                                                                                                                                                   | Aspartate transaminase EC 2.6.1.1                                                                                                                                                                                           |             |                        | up (4.2300,4.3100)     | 1        | 0          | 0            | 1           |
| SCUTAM2010C11.g | GS1_SS_05426_12819 | AminoAcid metabolism | carboxylase         |                         | Methylcrotonoyl-CoA carboxylase subunit alpha, mitochondrial; 3-methylcrotonyl-CoA carboxylase 1; MCCase subunit alpha; 3-methylcrotonyl-CoA:carbon dioxide ligase subunit alpha; | unknown [Zea mays]                                                                                                                                                                                                          |             |                        | up (2.9900,3.3200)     | 1        | 0          | 0            | 1           |
| SCJFRZ2007C01.g | GS1_SS_14783_16054 | AminoAcid metabolism | Cysteine metabolism | Amino acid metabolism   | Cysteine synthase (EC 4.2.99.8)                                                                                                                                                   | Os06g0149900 [Oryza sativa (japonica cultivar-group)] putative cysteine synthase [Oryza sativa Japonica Group] Os06g0149900 [Oryza sativa (japonica cultivar-group)]                                                        |             | down (-3.0300,-4.1900) | 0                      | 1        | 0          | 1            |             |
| SCEQRT1029F09.g | GS1_SS_11796_19381 | AminoAcid metabolism | decarboxylase       | Amino acid metabolism   | Glutamate decarboxylase (EC 4.1.1.15)                                                                                                                                             | unknown [Zea mays]                                                                                                                                                                                                          |             | up (2.0400,3.1800)     | 1                      | 0        | 0          | 1            |             |
| SCJLRT1020D01.g | GS1_SS_12558_17983 | AminoAcid metabolism | decarboxylase       | Amino acid metabolism   | serine decarboxylase                                                                                                                                                              | retrotransposon protein, putative, unclassified [Oryza sativa (japonica cultivar-group)]                                                                                                                                    |             |                        | up (4.6500,4.5200)     | 1        | 0          | 0            | 1           |
| SCVPCL6046C06.g | GS1_SS_05641_02503 | AminoAcid metabolism | dehydrogenase       |                         | Glutamate dehydrogenase: GDH                                                                                                                                                      | hypothetical protein LOC100193614 [Zea mays] unknown [Zea mays]                                                                                                                                                             |             |                        | up (4.7600,4.8900)     | 1        | 0          | 0            | 1           |
| SCVPRT2076C02.g | GS1_SS_11765_09739 | AminoAcid metabolism | dehydrogenase       |                         | Isovaleryl-CoA dehydrogenase, mitochondrial; IVD;                                                                                                                                 | unknown [Zea mays]                                                                                                                                                                                                          |             | up (3.3700,4.1500)     | up (5.3000,5.8600)     | 2        | 0          | 0            | 2           |
| SCQSRT1036B03.g | GS1_SS_12504_13385 | AminoAcid metabolism | dehydrogenase       |                         | Alpha-amino adipic semialdehyde synthase; cAt-LKR/SDH; LKR/SDH; Includes: Lysine ketoglutarate reductase; LKR; Includes: Saccharopine dehydrogenase; cAt-SDH; SDH                 | lysine-ketoglutarate reductase/saccharopine dehydr [Zea mays] lysine ketoglutarate reductase/saccharopine dehydrogenase [Zea mays] lysine-ketoglutarate reductase/saccharopine dehydrogenase bifunctional enzyme [Zea mays] |             | up (5.3700,5.5200)     | up (7.0600,6.8600)     | 2        | 0          | 0            | 2           |
| SCAGLR2011G09.g | GS1_SS_11372_16920 | AminoAcid metabolism | hydrolase           | Secondary metabolism    | putrescine biosynthesis                                                                                                                                                           | Agmatinase, mitochondrial precursor (EC 3.5.3.11) (Agmatine ureohydrolase) (AUH)                                                                                                                                            |             |                        | up (2.2100,2.5200)     | 1        | 0          | 0            | 1           |
| SCJFLR1073D03.g | GS1_SS_09817_18375 | AminoAcid metabolism | isomerase           | Secondary metabolism    | Glutamate-1-semialdehyde 2,1-aminomutase, chloroplast precursor (GSA)                                                                                                             | unknown [Zea mays]                                                                                                                                                                                                          |             | down (-2.8400,-2.8100) | 0                      | 1        | 0          | 1            |             |
| SCSGAM1094D07.g | GS1_SS_21852_21710 | AminoAcid metabolism | kinase/phosphatase  | Amino acid metabolism   | aspartate kinase                                                                                                                                                                  | monofunctional aspartate kinase 1 [Zea mays]                                                                                                                                                                                |             | down (-3.1500,-4.7000) | down (-4.7600,-5.3400) | 0        | 2          | 0            | 2           |
| SCSGAM1094D07.g | GS1_AS_21852_21709 | AminoAcid metabolism | kinase/phosphatase  | Amino acid metabolism   | aspartate kinase                                                                                                                                                                  | monofunctional aspartate kinase 1 [Zea mays]                                                                                                                                                                                |             |                        | down (-3.6400,-3.6900) | 0        | 1          | 0            | 1           |
| SCCART1002D04.g | GS1_AS_04538_19991 | AminoAcid metabolism | lyase               | Amino acid metabolism   | hydroxymethylglutaryl-CoA lyase                                                                                                                                                   | unknown [Zea mays]                                                                                                                                                                                                          |             | down (-2.6600,-4.1000) |                        | 0        | 1          | 0            | 1           |
| SCCART1002D04.g | GS1_SS_04538_19992 | AminoAcid metabolism | lyase               | Amino acid metabolism   | hydroxymethylglutaryl-CoA lyase                                                                                                                                                   | unknown [Zea mays]                                                                                                                                                                                                          |             |                        | up (4.7500,3.8200)     | 1        | 0          | 0            | 1           |
| SCRFLB1054G09.g | GS1_SS_09389_18091 | AminoAcid metabolism | lyase               | Amino acid metabolism   | homogentisate 1,2-dioxygenase                                                                                                                                                     | hypothetical protein OsI_020541 [Oryza sativa (indica cultivar-group)]                                                                                                                                                      |             |                        | up (4.2700,4.4900)     | 1        | 0          | 0            | 1           |
| SCEPRT2043A05.g | GS1_SS_04882_15060 | AminoAcid metabolism | oxidoreductase      | Amino acid metabolism   | dihydrodipicolinate reductase                                                                                                                                                     | hypothetical protein LOC100194039 [Zea mays] unknown [Zea mays]                                                                                                                                                             |             | down (-2.3500,-3.5400) |                        | 0        | 1          | 0            | 1           |

|                 |                    |                                             |                                   |                         |                                                                                                     |                                                                                                                                                                                                                                               |                        |                        |   |   |   |   |
|-----------------|--------------------|---------------------------------------------|-----------------------------------|-------------------------|-----------------------------------------------------------------------------------------------------|-----------------------------------------------------------------------------------------------------------------------------------------------------------------------------------------------------------------------------------------------|------------------------|------------------------|---|---|---|---|
| SCQGLR1041H02.g | GS1_SS_25524_14233 | AminoAcid metabolism                        | oxidoreductase                    |                         | Copper methylamine oxidase; Primary amine oxidase; MAOXII;                                          | hypothetical protein OsJ_014565 [Oryza sativa (japonica cultivar-group)]                                                                                                                                                                      |                        | up (3.7100,3.9800)     | 1 | 0 | 0 | 1 |
| SCCCLR2C03D07.g | GS1_SS_11323_12949 | AminoAcid metabolism                        | oxygenase                         |                         |                                                                                                     | unknown [Zea mays]                                                                                                                                                                                                                            | down (-1.8400,-1.6500) | up (3.1200,4.3500)     | 1 | 1 | 0 | 2 |
| SCRFRZ3056G09.g | GS1_SS_16192_16179 | AminoAcid metabolism                        | Reductase                         | Carbohydrate metabolism | nitrate reductase                                                                                   | nitrate reductase [Zea mays]                                                                                                                                                                                                                  |                        | down (-4.2600,-5.8500) | 0 | 1 | 0 | 1 |
| SCEZLB1013C10.g | GS1_SS_08139_00976 | AminoAcid metabolism                        | synthase                          |                         | Non-specific lipid-transfer protein-like protein At5g64080;                                         | unknown [Zea mays]                                                                                                                                                                                                                            |                        | up (4.1200,6.5400)     | 1 | 0 | 0 | 1 |
| SCBFRZ2016H04.g | GS1_SS_23025_03030 | AminoAcid metabolism                        | synthase                          |                         | Proline synthetase co-transcribed bacterial homolog protein                                         | unknown [Zea mays]                                                                                                                                                                                                                            |                        | down (-3.3700,-3.4000) | 0 | 1 | 0 | 1 |
| SCAGLR1021D07.g | GS1_SS_21790_21400 | AminoAcid metabolism                        | synthase                          | Amino acid metabolism   | Acetohydroxyacid synthase                                                                           | Acetolactate synthase 2, chloroplastic; Acetohydroxy-acid synthase 2; acetohydroxyacid synthase [Zea mays]                                                                                                                                    | down (-3.7000,-4.0900) |                        | 0 | 1 | 0 | 1 |
| SCAGLR2033D10.g | GS1_SS_17194_20403 | AminoAcid metabolism                        | Transferase family                | Stress                  | Water stress                                                                                        | repressed                                                                                                                                                                                                                                     |                        | down (-3.3600,-3.4400) | 0 | 1 | 0 | 1 |
| SCEPRZ1010D11.g | GS1_SS_09749_16325 | AminoAcid metabolism                        | transporter                       | Transporters            | Transmembrane amino acid transporter protein (Aa_trans)                                             | unknown [Zea mays]                                                                                                                                                                                                                            |                        | down (-3.6400,-4.5000) | 0 | 1 | 0 | 1 |
| SCCCFL5058C04.g | GS1_SS_23749_13229 | AminoAcid metabolism                        | Transporters                      |                         |                                                                                                     | hypothetical protein [Vitis vinifera]                                                                                                                                                                                                         |                        | down (-3.4800,-3.7800) | 0 | 1 | 0 | 1 |
| SCVPST1062B05.g | GS1_SS_00738_19752 | AminoAcid metabolism                        | uncharacterized                   | Amino acid metabolism   | Serpin                                                                                              | Os05g0511800 [Oryza sativa (japonica cultivar-group)]<br>Os05g0511800 [Oryza sativa (japonica cultivar-group)]                                                                                                                                | down (-2.7700,-2.9800) |                        | 0 | 1 | 0 | 1 |
| SCBGST3111B12.g | GS1_SS_18535_09005 | AminoAcid metabolism                        |                                   |                         | Aspartokinase 1, chloroplastic; Aspartate kinase 1;                                                 | monofunctional aspartate kinase 1 [Zea mays]                                                                                                                                                                                                  | down (-2.7800,-4.2700) | down (-5.3700,-5.2800) | 0 | 2 | 0 | 2 |
| SCAGLR1043B10.g | GS1_SS_18416_17211 | Biosynthesis of other Secondary Metabolites | Flavone and flavonol biosynthesis | Cell wall               | putative flavonoid 3 hydroxylase (F3H)                                                              | CYP75A5 (flavonoid 3-monoxygenase / flavonoid 3-hydroxylase)                                                                                                                                                                                  | down (-2.1700,-5.0700) | down (-3.8900,-5.5500) | 0 | 2 | 0 | 2 |
| SCCCCL3003H07.b | GS1_SS_05810_08429 | Biosynthesis of other Secondary Metabolites | lyase                             |                         |                                                                                                     | unknown [Zea mays]                                                                                                                                                                                                                            |                        | up (4.3200,5.0900)     | 1 | 0 | 0 | 1 |
| SCCCLR1022F07.g | GS1_SS_08126_19540 | Biosynthesis of other Secondary Metabolites | oxidoreductase                    | Secondary metabolism    | putative short chain alcohol dehydrogenase                                                          | unknown [Zea mays]                                                                                                                                                                                                                            | down (-2.0400,-3.1700) | down (-4.7500,-4.6100) | 0 | 2 | 0 | 2 |
| SCCCRZ1C01E09.g | GS1_SS_10514_16646 | Biosynthesis of other Secondary Metabolites | transferase                       | Secondary metabolism    | putative steroid sulfotransferase                                                                   | unknown [Zea mays]                                                                                                                                                                                                                            | down (-3.8100,-4.7600) | down (-4.7600,-5.5600) | 0 | 2 | 0 | 2 |
| SCSBSB1096D03.g | GS1_SS_19516_18083 | Carbohydrate metabolism                     | aldolase                          | Bioenergetics           | glycolysis                                                                                          | Fructose-bisphosphate aldolase chloroplast precursor (EC 4.1.2.13) (ALDP)                                                                                                                                                                     | down (-3.4900,-4.7100) | down (-6.3400,-6.3200) | 0 | 2 | 0 | 2 |
| SCRULR1020D11.g | GS1_SS_16825_18372 | Carbohydrate metabolism                     | aldolase                          | Carbohydrate metabolism | glycolysis                                                                                          | Fructose-bisphosphate aldolase                                                                                                                                                                                                                |                        | down (-4.8100,-8.7800) | 0 | 1 | 0 | 1 |
| SCQSLR1018D02.g | GS1_SS_18505_19852 | Carbohydrate metabolism                     | aldolase                          | Bioenergetics           | glycolysis                                                                                          | Aldolase                                                                                                                                                                                                                                      | down (-3.0900,-3.9800) | down (-6.2400,-6.2400) | 0 | 2 | 0 | 2 |
| SCCCLR1001E04.g | GS1_SS_09575_15878 | Carbohydrate metabolism                     | carboxylase                       | Carbohydrate metabolism | photosynthesis (Calvin cycle)                                                                       | RUBISCO - small subunit                                                                                                                                                                                                                       | down (-3.1300,-3.3800) | down (-5.1100,-8.4700) | 0 | 2 | 0 | 2 |
| SCCCLR1048B08.g | GS1_SS_10105_14869 | Carbohydrate metabolism                     | carboxylase                       | Carbohydrate metabolism | Fructose and Mannose Metabolism                                                                     | Triose-phosphate isomerase                                                                                                                                                                                                                    |                        | down (-4.0300,-5.5900) | 0 | 1 | 0 | 1 |
| SCRFLR1012B07.g | GS1_SS_13556_16301 | Carbohydrate metabolism                     | dehydrogenase                     | Carbohydrate metabolism | Citrate cycle (TCA cycle)                                                                           | Succinate dehydrogenase EC 1.3.99.1                                                                                                                                                                                                           |                        | up (2.8400,3.6400)     | 1 | 0 | 0 | 1 |
| SCEPAM2056A01.g | GS1_SS_04079_03112 | Carbohydrate metabolism                     | dehydrogenase                     |                         |                                                                                                     | unknown [Zea mays]                                                                                                                                                                                                                            | down (-3.7900,-6.0700) |                        | 0 | 1 | 0 | 1 |
| SCJFRT1009B10.g | GS1_SS_12181_09892 | Carbohydrate metabolism                     | dehydrogenase                     |                         | Acyl-coenzyme A oxidase 4, peroxisomal; AOX 4; Short-chain acyl-CoA oxidase; SAOX; AtCX4; AtG6; G6p | unknown [Zea mays]                                                                                                                                                                                                                            |                        | up (3.9100,4.9500)     | 1 | 0 | 0 | 1 |
| SCSBSB1052D07.g | GS1_SS_21449_18655 | Carbohydrate metabolism                     | dehydrogenase                     | Carbohydrate metabolism | Glycolysis/Gluconeogenesis                                                                          | Glyceraldehyde-3-phosphate dehydrogenase EC 1.2.1.12                                                                                                                                                                                          |                        | down (-4.7300,-7.7700) | 0 | 1 | 0 | 1 |
| SCVPRZ2037A02.g | GS1_SS_02328_19965 | Carbohydrate metabolism                     | Fructose/Mannose/Galactose        | Cell wall               | Beta-galactosidase                                                                                  | Os03g0165400 [Oryza sativa (japonica cultivar-group)]<br>Beta-galactosidase 5; Lactase 5; Beta-galactosidase precursor, putative, expressed [Oryza sativa (japonica cultivar-group)]<br>Os03g0165400 [Oryza sativa (japonica cultivar-group)] |                        | down (-3.5600,-4.3800) | 0 | 1 | 0 | 1 |
| SCEPAM1022E11.g | GS1_SS_01796_14727 | Carbohydrate metabolism                     | Fructose/Mannose/Galactose        | Cell wall               | Beta-galactosidase                                                                                  | unknown [Zea mays]                                                                                                                                                                                                                            |                        | up (3.5600,3.6300)     | 1 | 0 | 0 | 1 |
| SCJLFL3014G04.g | GS1_SS_25944_16171 | Carbohydrate metabolism                     | Fructose/Mannose/Galactose        | Cell wall               | Beta-galactosidase                                                                                  | hypothetical protein OsI_002513 [Oryza sativa (indica cultivar-group)]                                                                                                                                                                        | down (-3.1100,-3.8300) | down (-4.7800,-5.1600) | 0 | 2 | 0 | 2 |

|                 |                    |                         |                                                      |                         |                                                                                                                   |                                                                                                                                                                                      |                        |                        |   |   |   |   |
|-----------------|--------------------|-------------------------|------------------------------------------------------|-------------------------|-------------------------------------------------------------------------------------------------------------------|--------------------------------------------------------------------------------------------------------------------------------------------------------------------------------------|------------------------|------------------------|---|---|---|---|
| SCCCCL4009F05.g | GS1_AS_21374_15488 | Carbohydrate metabolism | Glyco-Hydro                                          | Cell wall               | Beta-xylosidase/alpha-L-arabinofuranosidase (GH family 3)                                                         | Xylan 1,4-beta-xylosidase EC 3.2.1.37                                                                                                                                                |                        | up (4.7400,4.6500)     | 1 | 0 | 0 | 1 |
| SCCCCL4009F05.g | GS1_SS_21374_15489 | Carbohydrate metabolism | Glyco-Hydro                                          | Cell wall               | Beta-xylosidase/alpha-L-arabinofuranosidase (GH family 3)                                                         | Xylan 1,4-beta-xylosidase EC 3.2.1.37                                                                                                                                                | down (-2.7200,-3.9900) |                        | 0 | 1 | 0 | 1 |
| SCCCCL7C02F04.g | GS1_AS_21108_19494 | Carbohydrate metabolism | glycosyltransferases                                 | Carbohydrate metabolism | Putative 4-alpha-glucanotransferase                                                                               | disproportionating enzyme [Aegilops tauschii]                                                                                                                                        |                        | up (3.7900,3.1300)     | 1 | 0 | 0 | 1 |
| SCACAD1037B06.g | GS1_SS_00142_20039 | Carbohydrate metabolism | Hydratase                                            | Bioenergetics           | glyoxylate cycle                                                                                                  | Aconitate hydratase cytoplasmic (EC 4.2.1.3)(Citrate hydrolyase)(Aconitase)(Aconitase)                                                                                               | up (2.3400,2.5900)     |                        | 1 | 0 | 0 | 1 |
| SCJLLR1107D06.g | GS1_SS_11621_09365 | Carbohydrate metabolism | hydrolase                                            | .                       | .                                                                                                                 | unknown [Zea mays]                                                                                                                                                                   | up (7.1400,3.6800)     | up (3.7600,7.5500)     | 2 | 0 | 0 | 2 |
| SCEPAM2053H08.g | GS1_SS_04043_15271 | Carbohydrate metabolism | hydrolase                                            | Carbohydrate metabolism | Starch and sucrose metabolism                                                                                     | 1,4-alpha-glucan branching enzyme EC 2.4.1.18                                                                                                                                        | down (-2.8600,-3.6000) |                        | 0 | 1 | 0 | 1 |
| SCCCST1C02D05.g | GS1_SS_17710_19657 | Carbohydrate metabolism | hydrolase                                            | Carbohydrate metabolism | Aminosugars metabolism                                                                                            | beta-N-Acetylhexosaminidase EC 3.2.1.52                                                                                                                                              | down (-6.0000,-5.2600) | down (-3.4800,-4.1900) | 0 | 2 | 0 | 2 |
| SCCCCL3002B11.b | GS1_SS_05765_17065 | Carbohydrate metabolism | hydrolase                                            | Carbohydrate metabolism | Starch and sucrose metabolism                                                                                     | Alpha amylase EC 3.2.1.1                                                                                                                                                             |                        | up (3.4800,4.4500)     | 1 | 0 | 0 | 1 |
| SCMCRT2086D03.g | GS1_SS_11933_07426 | Carbohydrate metabolism | kinase/phosphatase                                   | .                       | Hexokinase-7; Hexokinase-6                                                                                        | unknown [Zea mays]                                                                                                                                                                   |                        | up (4.7100,2.9100)     | 1 | 0 | 0 | 1 |
| SCJFRZ2007A03.g | GS1_SS_11611_11276 | Carbohydrate metabolism | kinase/phosphatase                                   | Protein kinase          | other                                                                                                             | canePEPC kinase-1 (Phosphoenolpyruvate carboxylase kinase)                                                                                                                           | down (-1.4900,-2.0700) | up (3.9500,2.8300)     | 1 | 1 | 0 | 2 |
| SCJFRT1060F11.g | GS1_SS_12311_21183 | Carbohydrate metabolism | kinase/phosphatase                                   | Carbohydrate metabolism | Photosynthesis                                                                                                    | Pyruvate,orthophosphate dikinase                                                                                                                                                     |                        | down (-3.3500,-4.2200) | 0 | 1 | 0 | 1 |
| SCBGST3105A06.g | GS1_AS_18508_15469 | Carbohydrate metabolism | kinase/phosphatase                                   | Carbohydrate metabolism | Pentose phosphate pathway                                                                                         | Fructose-bisphosphatase Hexosediphosphatase EC 3.1.3.11                                                                                                                              |                        | down (-2.7300,-3.1200) | 0 | 1 | 0 | 1 |
| SCBGLR1115H04.g | GS1_SS_17458_16314 | Carbohydrate metabolism | kinase/phosphatase                                   | Carbohydrate metabolism | Carbon fixation                                                                                                   | Sedoheptulose bisphosphatase EC 3.1.3.37                                                                                                                                             |                        | down (-2.9700,-4.2500) | 0 | 1 | 0 | 1 |
| SCCCLR1048E03.g | GS1_SS_17069_03411 | Carbohydrate metabolism | kinase/phosphatase                                   | .                       | Alpha-glucan water dikinase, chloroplastic; Starch-related R1 protein;                                            | Os06g0498400 [Oryza sativa (japonica cultivar-group)]<br>Os06g0498400 [Oryza sativa (japonica cultivar-group)]                                                                       | down (-3.2100,-3.1500) |                        | 0 | 1 | 0 | 1 |
| SCEZLB1006F11.g | GS1_SS_17085_18093 | Carbohydrate metabolism | kinase/phosphatase                                   | Carbohydrate metabolism | Glycolysis/Gluconeogenesis                                                                                        | Phosphoglycerate kinase EC 2.7.2.3                                                                                                                                                   |                        | down (-4.5300,-6.1600) | 0 | 1 | 0 | 1 |
| SCBGST3105A06.g | GS1_SS_18508_15468 | Carbohydrate metabolism | kinase/phosphatase                                   | Carbohydrate metabolism | Pentose phosphate pathway                                                                                         | Fructose-bisphosphatase Hexosediphosphatase EC 3.1.3.11                                                                                                                              |                        | down (-3.2400,-5.1400) | 0 | 1 | 0 | 1 |
| SCEPRT2048D06.g | GS1_SS_06461_16032 | Carbohydrate metabolism | kinase/phosphatase                                   | Carbohydrate metabolism | Fructose and Mannose Metabolism                                                                                   | 6-Phosphofructokinase EC 2.7.1.11                                                                                                                                                    |                        | down (-5.0900,-4.5200) | 0 | 1 | 0 | 1 |
| SCEPAM1015F07.g | GS1_SS_04314_15179 | Carbohydrate metabolism | kinase/phosphatase                                   | Carbohydrate metabolism | Alpha-glucan phosphorylase (starch phosphorylase)                                                                 | starch phosphorylase 1 precursor [Zea mays]                                                                                                                                          | down (-2.7200,-4.7600) |                        | 0 | 1 | 0 | 1 |
| SCUTAM2089E05.g | GS1_SS_05498_17977 | Carbohydrate metabolism | lyase                                                | Carbohydrate metabolism | Starch and sucrose metabolism                                                                                     | Beta-Amylase EC 3.2.1.2                                                                                                                                                              | down (-4.4800,-7.4300) | down (-5.5500,-5.8500) | 0 | 2 | 0 | 2 |
| SCUTLR2030E06.g | GS1_SS_11655_20223 | Carbohydrate metabolism | lyase                                                | Carbohydrate metabolism | Starch and sucrose metabolism                                                                                     | Amylophosphorylase, alpha-glucan phosphorylase EC 2.4.1.1                                                                                                                            | down (-3.8200,-4.5000) |                        | 0 | 1 | 0 | 1 |
| SCCCST2002A09.g | GS1_SS_07635_18343 | Carbohydrate metabolism | mutase                                               | Bioenergetics           | glycolysis                                                                                                        | 23-bisphosphoglycerate-independent phosphoglycerate mutase (EC 5.4.2.1) (Phosphoglyceromut                                                                                           | up (4.5300,4.3300)     | up (3.4400,4.4800)     | 2 | 0 | 0 | 2 |
| SCCCLR1C02C02.g | GS1_SS_05575_08561 | Carbohydrate metabolism | Nucleotide sugar synthesis, conversion and transport | Cell wall               | UDP-glucuronate 4-epimerase                                                                                       | unknown [Zea mays]                                                                                                                                                                   | down (-4.2800,-3.2200) |                        | 0 | 1 | 0 | 1 |
| SCCCT1C05A07.g  | GS1_SS_24436_08415 | Carbohydrate metabolism | others                                               | .                       | Beta-hexosaminidase subunit B2; N-acetyl-beta-glucosaminidase subunit B2; Beta-N-acetylhexosaminidase subunit B2; | Os01g0891000 [Oryza sativa (japonica cultivar-group)]<br>putative beta-N-acetylhexosaminidase [Oryza sativa Japonica Group]<br>Os01g0891000 [Oryza sativa (japonica cultivar-group)] | down (-5.8500,-6.3900) | down (-4.2500,-4.7100) | 0 | 2 | 0 | 2 |
| SCCCLR1048E04.g | GS1_SS_07122_06922 | Carbohydrate metabolism | others                                               | .                       | Uncharacterized protein YKL128C                                                                                   | OSIGBa0123D13.3 [Oryza sativa (indica cultivar-group)]                                                                                                                               | up (1.9600,4.3000)     | up (4.8000,4.1600)     | 2 | 0 | 0 | 2 |
| SCACSB1117A12.g | GS1_SS_20946_16760 | Carbohydrate metabolism | others                                               | Carbohydrate metabolism | Alpha-glucan phosphorylase (starch phosphorylase)                                                                 | starch phosphorylase 1 precursor [Zea mays]                                                                                                                                          | down (-3.2500,-5.5500) |                        | 0 | 1 | 0 | 1 |
| SCCCCL6C03G01.g | GS1_SS_06606_16330 | Carbohydrate metabolism | others                                               | Pathogenicity           | Protease inhibitors                                                                                               | Kunitz                                                                                                                                                                               |                        | up (4.2000,4.5400)     | 1 | 0 | 0 | 1 |
| SCEPRT2048D07.g | GS1_SS_12960_09973 | Carbohydrate metabolism | oxidoreductase                                       | .                       | Probable NAD(P)H-dependent oxidoreductase 1                                                                       | unknown [Zea mays]                                                                                                                                                                   | up (3.0400,3.0200)     |                        | 1 | 0 | 0 | 1 |
| SCJLLR1103A10.g | GS1_SS_20438_20605 | Carbohydrate metabolism | protein-protein interaction                          | Carbohydrate metabolism | Putative 32.7 kDa jasmonate-induced protein                                                                       | hypothetical protein Osl_036610 [Oryza sativa (indica cultivar-group)]                                                                                                               | down (-3.6600,-7.6000) |                        | 0 | 1 | 0 | 1 |
| SCEQLR1094C07.g | GS1_SS_10405_10135 | Carbohydrate metabolism | Reductase                                            | .                       | Uncharacterized oxidoreductase At1g06690, chloroplastic;                                                          | unknown [Zea mays]                                                                                                                                                                   |                        | down (-3.3300,-3.2700) | 0 | 1 | 0 | 1 |

|                 |                    |                         |                                                         |                         |                                                                                        |                                                                                                                                                                                        |  |                        |                        |   |   |   |   |
|-----------------|--------------------|-------------------------|---------------------------------------------------------|-------------------------|----------------------------------------------------------------------------------------|----------------------------------------------------------------------------------------------------------------------------------------------------------------------------------------|--|------------------------|------------------------|---|---|---|---|
| SCEQAM1036A06.g | GS1_SS_02122_15843 | Carbohydrate metabolism | Sacrose/trealose/sorbitol e outros mono-oligosacarídeos | Cell wall               | sucrose-phosphate synthase                                                             | Sucrose phosphate synthase EC 2.4.1.14                                                                                                                                                 |  | down (-2.8500,-4.8600) | 0                      | 1 | 0 | 1 |   |
| SCJFRZ2029F03.g | GS1_SS_11586_15029 | Carbohydrate metabolism | several pathways (several putative substrates)          | Cell wall               | Glycoside hydrolase family 31 (alpha-glucosidase or alpha-xylosidase)                  | Alpha-Glucosidase EC 3.2.1.20                                                                                                                                                          |  | down (-3.2900,-4.0200) | 0                      | 1 | 0 | 1 |   |
| SCPIRT3021H05.g | GS1_SS_24492_21541 | Carbohydrate metabolism | several pathways (several putative substrates)          | Cell wall               | glucosyltransferase                                                                    | ref NP_910035.1  putative UDP-glucosyltransferase [Oryza sativa (japonica cultivar-group)]<br>gb AAO18436.1  putative UDP-glucosyltransferase [Oryza sativa (japonica cultivar-group)] |  | down (-4.7200,-5.9200) | down (-6.1400,-7.0600) | 0 | 2 | 0 | 2 |
| SCMCRT2103F09.g | GS1_SS_13619_18216 | Carbohydrate metabolism | several pathways (several putative substrates)          | Cell wall               | UDP- glucosyltransferase                                                               | gb AAF17077.1  UDP-glucose glucosyltransferase [Sorghum bicolor]                                                                                                                       |  | down (-2.4300,-4.3000) | down (-4.6000,-5.4100) | 0 | 2 | 0 | 2 |
| SCBGSB1026A09.g | GS1_SS_33513_19414 | Carbohydrate metabolism | several pathways (several putative substrates)          | Cell wall               | Glycosyl hydrolase family 1                                                            | Os01g0508000 [Oryza sativa (japonica cultivar-group)]<br>putative beta-glucosidase [Oryza sativa Japonica Group]<br>Os01g0508000 [Oryza sativa (japonica cultivar-group)]              |  |                        | down (-3.4200,-3.9000) | 0 | 1 | 0 | 1 |
| SCEQHR1082B01.g | GS1_SS_14031_15728 | Carbohydrate metabolism | several pathways (several putative substrates)          | Cell wall               | Glycosyl hydrolase family 1                                                            | hypothetical protein Osl_030804 [Oryza sativa (indica cultivar-group)]                                                                                                                 |  | down (-4.4400,-7.3600) | down (-6.0200,-7.2500) | 0 | 2 | 0 | 2 |
| SCSBSB1057E03.g | GS1_SS_17065_21024 | Carbohydrate metabolism | several pathways (several putative substrates)          | Cell wall               | Glycosyl hydrolase family 1                                                            | hypothetical protein Osl_002091 [Oryza sativa (indica cultivar-group)]                                                                                                                 |  |                        | down (-4.5700,-4.5300) | 0 | 1 | 0 | 1 |
| SCSGAM2105D04.g | GS1_SS_23663_18537 | Carbohydrate metabolism | several pathways (several putative substrates)          | Cell wall               | UDP- glucosyltransferase                                                               | induced                                                                                                                                                                                |  |                        | down (-4.9100,-6.0400) | 0 | 1 | 0 | 1 |
| SCMCRZ3068G10.g | GS1_SS_16085_12578 | Carbohydrate metabolism | several pathways (several putative substrates)          | Cell wall               | Galactosyltransferase                                                                  | unknown [Zea mays]                                                                                                                                                                     |  |                        | up (3.9400,5.4800)     | 1 | 0 | 0 | 1 |
| SCAGST3140F06.g | GS1_SS_12529_20983 | Carbohydrate metabolism | several pathways (several putative substrates)          | Cell wall               | UDP- glucosyltransferase                                                               | hypothetical protein Osl_021002 [Oryza sativa (japonica cultivar-group)]                                                                                                               |  | up (2.2400,2.4900)     |                        | 1 | 0 | 0 | 1 |
| SCJFHR1C03E12.b | GS1_SS_07966_02619 | Carbohydrate metabolism | several pathways (several putative substrates)          | Cell wall               | Glycosyl hydrolase family 1                                                            | unknown [Zea mays]                                                                                                                                                                     |  | up (2.8200,3.1500)     |                        | 1 | 0 | 0 | 1 |
| SCBFAM2022B05.g | GS1_SS_20357_15309 | Carbohydrate metabolism | several pathways (several putative substrates)          | Cell wall               | Galactosyltransferase                                                                  | unknown [Zea mays] unknown [Zea mays]                                                                                                                                                  |  |                        | down (-3.3800,-4.1100) | 0 | 1 | 0 | 1 |
| SCCCLB1021E06.g | GS1_SS_18463_21827 | Carbohydrate metabolism | Starch synthase EC 2.4.1.21                             | Carbohydrate metabolism | Starch and sucrose metabolism                                                          | Starch synthase EC 2.4.1.21                                                                                                                                                            |  |                        | down (-6.4200,-5.9800) | 0 | 1 | 0 | 1 |
| SCEPCL6023F02.g | GS1_SS_00431_19531 | Carbohydrate metabolism | sucrose methabolism                                     | Cell wall               | sucrose synthase                                                                       | Sucrose synthase EC 2.4.1.13                                                                                                                                                           |  | up (4.3300,3.2800)     |                        | 1 | 0 | 0 | 1 |
| SCJFLR1017E09.g | GS1_AS_08724_06084 | Carbohydrate metabolism | synthase                                                |                         | Uncharacterized glycosyltransferase At1g55740                                          | unknown [Zea mays]                                                                                                                                                                     |  |                        | up (3.9600,4.4900)     | 1 | 0 | 0 | 1 |
| SCJLRT2052C09.g | GS1_SS_13522_14567 | Carbohydrate metabolism | synthase                                                | Carbohydrate metabolism | chalcone synthase                                                                      | unknown [Zea mays]                                                                                                                                                                     |  |                        | up (5.8600,4.8800)     | 1 | 0 | 0 | 1 |
| SCJFLR1017E09.g | GS1_SS_08724_06083 | Carbohydrate metabolism | synthase                                                |                         | Uncharacterized glycosyltransferase At1g55740                                          | unknown [Zea mays]                                                                                                                                                                     |  | up (4.6700,2.3600)     |                        | 1 | 0 | 0 | 1 |
| SCCCAD1004H06.g | GS1_SS_00075_12059 | Carbohydrate metabolism | synthase                                                |                         | Inositol-3-phosphate synthase; Myo-inositol-1-phosphate synthase; MI-1-P synthase; IPS | unknown [Zea mays]                                                                                                                                                                     |  | up (6.4900,4.1600)     |                        | 1 | 0 | 0 | 1 |
| SCCCCL4001F08.g | GS1_SS_05956_20395 | Carbohydrate metabolism | synthase                                                | Carbohydrate metabolism | Glyoxylate cycle                                                                       | malate synthase                                                                                                                                                                        |  | up (6.8900,9.1600)     | up (8.3500,8.3000)     | 2 | 0 | 0 | 2 |
| SCAGCL6016B11.g | GS1_SS_06470_14954 | Carbohydrate metabolism | synthase                                                | Carbohydrate metabolism | Trehalose 6-phosphate synthase                                                         | unknown [Zea mays]                                                                                                                                                                     |  | up (2.0800,5.3500)     | up (5.0500,4.8700)     | 2 | 0 | 0 | 2 |
| SCBFLR1039F10.g | GS1_SS_19267_20380 | Carbohydrate metabolism | transferase                                             | Carbohydrate metabolism | Starch and sucrose metabolism                                                          | Glucose 1-phosphate adenyltransferase EC 2.7.7.27                                                                                                                                      |  |                        | down (-3.1300,-2.4800) | 0 | 1 | 0 | 1 |
| SCCCFL4002D04.g | GS1_SS_19851_18640 | Carbohydrate metabolism | transferase                                             | Carbohydrate metabolism | Starch and sucrose metabolism                                                          | Glucose 1-phosphate adenyltransferase EC 2.7.7.27                                                                                                                                      |  |                        | down (-3.3100,-3.7000) | 0 | 1 | 0 | 1 |
| SCSBSB1057D05.g | GS1_SS_16966_14693 | Carbohydrate metabolism | transferase                                             | Carbohydrate metabolism | Alpha-glucan phosphorylase (starch phosphorylase)                                      | starch phosphorylase 1 precursor [Zea mays]                                                                                                                                            |  | down (-2.6900,-5.2400) |                        | 0 | 1 | 0 | 1 |
| SCCCLR1C01F04.g | GS1_SS_12391_12149 | Carbohydrate metabolism | Transferase family                                      |                         | Probable UDP-glucosyl transferase At1g05670                                            | hypothetical protein Osl_028867 [Oryza sativa (japonica cultivar-group)]                                                                                                               |  |                        | up (3.2500,3.7100)     | 1 | 0 | 0 | 1 |
| SCCCLR1048C12.g | GS1_SS_10109_00767 | Carbohydrate metabolism | Transferase family                                      |                         | Uncharacterized glycosyltransferase At1g55740                                          | unknown [Zea mays]                                                                                                                                                                     |  |                        | up (4.5400,4.1000)     | 1 | 0 | 0 | 1 |

|                 |                    |                         |                            |                                             |                                                                                                              |                                                                                                                                                                                      |  |                        |                        |   |   |   |   |
|-----------------|--------------------|-------------------------|----------------------------|---------------------------------------------|--------------------------------------------------------------------------------------------------------------|--------------------------------------------------------------------------------------------------------------------------------------------------------------------------------------|--|------------------------|------------------------|---|---|---|---|
| SCVPCL6061A06.g | GS1_SS_23499_16674 | Carbohydrate metabolism | Transferase family         | Carbohydrate metabolism                     | Glucose 1-phosphate adenyltransferase (large subunit)                                                        | putative glucose-1-phosphate adenyltransferase large subunit 4 precursor [Zea mays]                                                                                                  |  |                        | down (-2.8800,-3.9900) | 0 | 1 | 0 | 1 |
| SCUTST3085B04.g | GS1_SS_34834_14615 | Carbohydrate metabolism | Transferase family         | Carbohydrate metabolism                     | Phosphoglucomutase                                                                                           | unknown [Zea mays]                                                                                                                                                                   |  |                        | down (-3.7900,-6.1200) | 0 | 1 | 0 | 1 |
| SCCCLR1072D05.g | GS1_SS_10125_06806 | Carbohydrate metabolism | translocator               |                                             | Protein RUPTURED POLLEN GRAIN 1                                                                              | unknown [Zea mays]                                                                                                                                                                   |  | up (3.5100,3.0500)     | up (4.4600,4.2600)     | 2 | 0 | 0 | 2 |
| SCSFRT2067F07.g | GS1_SS_16058_18459 | Carbohydrate metabolism | transporter                | Transporters                                | Sugar transporters                                                                                           | putative sugar transporter type 2a [Saccharum hybrid cultivar]                                                                                                                       |  |                        | down (-5.0000,-3.3000) | 0 | 1 | 0 | 1 |
| SCRRLR3043D02.g | GS1_SS_23626_18022 | Carbohydrate metabolism | Transporters               | Transporters                                | Sugar transporters                                                                                           | putative monosaccharide transporter [Oryza sativa (japonica)]                                                                                                                        |  |                        | down (-4.8200,-5.2900) | 0 | 1 | 0 | 1 |
| SCBFRT1064F09.g | GS1_SS_11766_12374 | Carbohydrate metabolism | Trehalose metabolism       |                                             | Probable alpha, alpha-trehalose-phosphate synthase [UDP-forming] 9; Trehalose-6-phosphate synthase 9; AtTPS9 | hypothetical protein LOC100191265 [Zea mays] unknown [Zea mays]                                                                                                                      |  |                        | up (4.2300,5.2800)     | 1 | 0 | 0 | 1 |
| SCSGSB1009B08.b | GS1_SS_17356_10984 | Carbohydrate metabolism |                            |                                             | Soluble starch synthase 2-2, chloroplastic/amyloplastic; Soluble starch synthase II-2;                       | starch synthase IIb-2 precursor [Zea mays] starch synthase IIb-2 precursor [Zea mays]                                                                                                |  |                        | down (-4.4000,-7.0500) | 0 | 1 | 0 | 1 |
| SCEQRT2092D05.g | GS1_SS_06885_18778 | Carbohydrate metabolism |                            | Carbohydrate metabolism                     | Glycolysis/Gluconeogenesis                                                                                   | Pyruvate decarboxylase EC 4.1.1.1                                                                                                                                                    |  |                        | up (2.9200,3.9500)     | 1 | 0 | 0 | 1 |
| SCSGFL4196D07.b | GS1_SS_24381_01934 | Carotenoid Metabolism   | synthase                   |                                             | Phytoene synthase, chloroplastic;                                                                            | chloroplast phytoene synthase 1 [Sorghum bicolor]                                                                                                                                    |  |                        | down (-3.0400,-5.1200) | 0 | 1 | 0 | 1 |
| SCACAM2044B11.g | GS1_SS_22983_21250 | Carotenoid Metabolism   | synthase                   | Lipid, fatty-acid and isoprenoid metabolism | Phytoene synthase, chloroplast precursor (EC 2.5.1.-)                                                        | chloroplast phytoene synthase 1 [Sorghum bicolor]                                                                                                                                    |  |                        | down (-3.6800,-5.2200) | 0 | 1 | 0 | 1 |
| SCEPCL6029D04.g | GS1_SS_06635_14709 | Cell cycle              | cyclin                     | Cell cycle                                  | cyclin                                                                                                       | Cyclin type B-like                                                                                                                                                                   |  | up (2.7300,3.5500)     | up (3.5500,4.3500)     | 2 | 0 | 0 | 2 |
| SCCCRZ1C01E03.g | GS1_SS_00247_17909 | Cell cycle              | DNA replication factor     | Cell cycle                                  | CDC                                                                                                          | replication licensing factor MCM4                                                                                                                                                    |  |                        | down (-3.0700,-5.7000) | 0 | 1 | 0 | 1 |
| SCCCLR1C05C04.g | GS1_SS_14930_16317 | Cell cycle              | DNA replication factor     | Cell cycle                                  | PROLIFERA protein                                                                                            | replication licensing factor MCM7 homologue [Zea mays] replication licensing factor MCM7 homologue [Zea mays]                                                                        |  |                        | down (-3.0800,-5.6900) | 0 | 1 | 0 | 1 |
| SCEPCL6029A03.g | GS1_SS_00447_18841 | Cell cycle              | DNA replication factor     | Cell cycle                                  | DNA replication licensing factor mcm6 (Minichromosome maintenance protein 6)                                 | minichromosome maintenance protein [Zea mays] minichromosome maintenance protein [Zea mays]                                                                                          |  |                        | down (-2.4800,-4.5100) | 0 | 1 | 0 | 1 |
| SCCCLR1072B11.g | GS1_SS_02556_20202 | Cell cycle              | DNA replication factor     | Cell cycle                                  | DNA replication licensing factor MCM3 homologue (Replication origin activator) (ROA protein)                 | replication origin activator 2 [Zea mays] DNA replication licensing factor MCM3 homologue 2; Replication origin activator 2; ROA protein 2 replication origin activator 2 [Zea mays] |  |                        | down (-3.9700,-4.8000) | 0 | 1 | 0 | 1 |
| SCBFSB1047G04.g | GS1_SS_16748_10326 | Cell cycle              | others                     |                                             | Cyclin-P4-1; CypP4;1                                                                                         | unknown [Zea mays]                                                                                                                                                                   |  | down (-2.8800,-4.8700) | down (-6.5000,-6.9300) | 0 | 2 | 0 | 2 |
| SCJFRZ2011A04.g | GS1_AS_14041_19022 | Cell cycle              | kinase                     | Protein kinase                              | cell cycle-related                                                                                           | caneCDC2-5                                                                                                                                                                           |  | up (2.5500,3.2700)     |                        | 1 | 0 | 0 | 1 |
| SCVPLR1049E05.g | GS1_SS_21231_17810 | Cell cycle              |                            | Cell cycle                                  | cyclin                                                                                                       | Cyclin Ia                                                                                                                                                                            |  |                        | down (-4.8100,-3.7600) | 0 | 1 | 0 | 1 |
| SCCCRT1002G03.g | GS1_SS_26188_15792 | Cell wall metabolism    | cell wall differentiation  | Cell wall                                   | Glycosyl hydrolase family 3 protein (Xylosidase)                                                             | Xylan 1,4-beta-xylosidase EC 3.2.1.37                                                                                                                                                |  | up (3.5200,3.5300)     |                        | 1 | 0 | 0 | 1 |
| SCCCLR1C06D03.g | GS1_SS_12746_10371 | Cell wall metabolism    | cell wall differentiation  | Cell wall                                   | alpha-L-fucosidase                                                                                           | unknown [Zea mays]                                                                                                                                                                   |  |                        | down (-4.2100,-3.4900) | 0 | 1 | 0 | 1 |
| SCCCRT1002F03.g | GS1_SS_11715_16904 | Cell wall metabolism    | cell wall differentiation  | Cell wall                                   | Xyloglucan endotransglycosylase/hydrolase (XTH)                                                              | unknown [Zea mays]                                                                                                                                                                   |  | down (-4.1600,-3.9500) | down (-3.6400,-6.1000) | 0 | 2 | 0 | 2 |
| SCCCLB1024D03.g | GS1_SS_08994_10758 | Cell wall metabolism    | cell wall differentiation  | Cell wall                                   | Pectinacetylesterase family protein                                                                          | unknown [Zea mays]                                                                                                                                                                   |  | down (-4.2900,-4.1500) | down (-4.2800,-3.8400) | 0 | 2 | 0 | 2 |
| SCCCCL7038A01.g | GS1_SS_07217_18359 | Cell wall metabolism    | cell wall differentiation  | Cell wall                                   | Mannan endo-1,4-beta-mannosidase                                                                             | hypothetical protein LOC100191416 [Zea mays] unknown [Zea mays]                                                                                                                      |  | down (-2.8400,-7.5700) | down (-7.9700,-6.9600) | 0 | 2 | 0 | 2 |
| SCCCLB1023H08.g | GS1_SS_21848_03892 | Cell wall metabolism    | Cell wall growth/extension | Cell wall                                   | Expansin                                                                                                     | unknown [Zea mays]                                                                                                                                                                   |  | down (-4.6900,-5.2800) | down (-5.6200,-5.7600) | 0 | 2 | 0 | 2 |
| SCCCLR1065A10.g | GS1_SS_15508_08491 | Cell wall metabolism    | Cell wall growth/extension | Cell wall                                   | Expansin                                                                                                     | unknown [Zea mays]                                                                                                                                                                   |  | down (-3.2200,-4.5800) | down (-4.8100,-4.6100) | 0 | 2 | 0 | 2 |
| SCCST1004C07.g  | GS1_SS_17511_10748 | Cell wall metabolism    | cell wall growth/extension | Cell wall                                   | Expansin                                                                                                     | unknown [Zea mays]                                                                                                                                                                   |  | up (5.9500,3.8600)     | up (4.8600,7.0500)     | 2 | 0 | 0 | 2 |
| SCEQRT2026A06.g | GS1_SS_12709_16322 | Cell wall metabolism    | Cell wall growth/extension | Cell wall                                   | Expansin                                                                                                     | Putative selT-like protein F28H7.4 precursor                                                                                                                                         |  |                        | up (8.8100,5.3500)     | 1 | 0 | 0 | 1 |
| SCCCL4006H09.g  | GS1_SS_07367_19801 | Cell wall metabolism    | Cell wall growth/extension | Cell wall                                   | Expansin                                                                                                     | unknown [Zea mays]                                                                                                                                                                   |  | down (-3.8900,-6.5400) | down (-4.8300,-5.6100) | 0 | 2 | 0 | 2 |
| SCEQRT2027A10.g | GS1_SS_09271_13480 | Cell wall metabolism    | Cell wall growth/extension | Cell wall                                   | Expansin                                                                                                     | alpha-expansin1 [Zea mays] unknown [Zea mays]                                                                                                                                        |  | down (-5.9700,-7.1600) | down (-6.0100,-8.0600) | 0 | 2 | 0 | 2 |
| SCEPRT2043B01.g | GS1_SS_12904_00991 | Cell wall metabolism    | Cell wall growth/extension | Cell wall                                   | Expansin                                                                                                     | unknown [Zea mays]                                                                                                                                                                   |  |                        | down (-3.2300,-6.2500) | 0 | 1 | 0 | 1 |

|                 |                    |                      |                              |                         |                                                                                                                 |                                                                                                                                                                                                                                                            |  |                        |                        |   |   |   |   |
|-----------------|--------------------|----------------------|------------------------------|-------------------------|-----------------------------------------------------------------------------------------------------------------|------------------------------------------------------------------------------------------------------------------------------------------------------------------------------------------------------------------------------------------------------------|--|------------------------|------------------------|---|---|---|---|
| SCCCLR1C06D07.g | GS1_SS_02595_16779 | Cell wall metabolism | dehydrogenase                | Amino acid metabolism   | betaine-aldehyde dehydrogenase                                                                                  | putative cytosolic aldehyde dehydrogenase [Oryza sativa Japonica Group] hypothetical protein OsJ_020998 [Oryza sativa (japonica cultivar-group)]                                                                                                           |  | down (-3.7000,-5.6100) | 0                      | 1 | 0 | 1 |   |
| SCMCS1062A02.g  | GS1_SS_25899_16947 | Cell wall metabolism | Lignin metabolism            | Cell wall               | dirigent-like protein                                                                                           | Disease resistance response protein-related                                                                                                                                                                                                                |  | up (4.5100,3.9400)     | 1                      | 0 | 0 | 1 |   |
| SCCCLR1066B10.g | GS1_SS_13278_17807 | Cell wall metabolism | N-Glycan biosynthesis        | Cell wall               | Cellulose synthase (CesA)                                                                                       | hypothetical protein Osl_024417 [Oryza sativa (indica cultivar-group)]                                                                                                                                                                                     |  | down (-2.4100,-4.5200) | 0                      | 1 | 0 | 1 |   |
| SCCCR22002G07.g | GS1_SS_12360_09060 | Cell wall metabolism | N-Glycan biosynthesis        | Cell wall               | Cellulose synthase (CesA)                                                                                       | cellulose synthase7 [Zea mays] cellulose synthase-7 [Zea mays]                                                                                                                                                                                             |  | down (-3.4000,-5.6600) | 0                      | 1 | 0 | 1 |   |
| SCEQLB1066G04.g | GS1_SS_00806_21326 | Cell wall metabolism | N-Glycan biosynthesis        | Cell wall               | Cellulose synthase like (CSL)                                                                                   | Cellulose synthase (UDP-forming) EC 2.4.1.12                                                                                                                                                                                                               |  | down (-3.2300,-5.0000) | 0                      | 1 | 0 | 1 |   |
| SCCCLR2C02H01.g | GS1_SS_01270_18061 | Cell wall metabolism | N-Glycan biosynthesis        | Cell wall               | Cellulose synthase (CesA)                                                                                       | Cellulose synthase (UDP-forming) EC 2.4.1.12                                                                                                                                                                                                               |  | down (-4.1300,-9.0700) | down (-4.0900,-9.1200) | 0 | 2 | 0 | 2 |
| SCQGR1044A07.g  | GS1_SS_12699_09207 | Cell wall metabolism | N-Glycan biosynthesis        | Cell wall               | Cellulose synthase                                                                                              | hypothetical protein LOC100193757 [Zea mays] unknown [Zea mays]                                                                                                                                                                                            |  | down (-4.7600,-5.5500) | down (-4.7200,-6.6900) | 0 | 2 | 0 | 2 |
| SCJLLR1106H06.g | GS1_SS_16877_07928 | Cell wall metabolism | N-Glycan biosynthesis        | Cell wall               | Cellulose synthase (CesA)                                                                                       | cellulose synthase catalytic subunit 10 [Zea mays]                                                                                                                                                                                                         |  | down (-3.7200,-8.3200) | down (-3.8900,-8.6900) | 0 | 2 | 0 | 2 |
| SCJLFL3019G10.g | GS1_SS_22523_09248 | Cell wall metabolism | N-Glycan biosynthesis        | Cell wall               | cellulose synthase like (CSL)                                                                                   | unknown [Zea mays]                                                                                                                                                                                                                                         |  | down (-2.6900,-4.3500) | down (-7.2200,-7.4400) | 0 | 2 | 0 | 2 |
| SCJFRT1008G05.g | GS1_SS_13327_19746 | Cell wall metabolism | Other glycan degradation     | Cell wall               | beta-1,3-glucanase Glycosyl hydrolases family 17                                                                | unknown [Zea mays]                                                                                                                                                                                                                                         |  | up (2.6400,4.3600)     |                        | 1 | 0 | 0 | 1 |
| SCUTLR2030G02.g | GS1_SS_00752_15697 | Cell wall metabolism | Other glycan degradation     | Cell wall               | endo-1,4-beta-glucanase Glycosyl hydrolase family 9                                                             | Cellulase, Endo-1,4-beta-glucanase EC 3.2.1.4                                                                                                                                                                                                              |  |                        | down (-3.5900,-5.1600) | 0 | 1 | 0 | 1 |
| SCEQRT2028G11.g | GS1_SS_07850_21784 | Cell wall metabolism | Other glycan degradation     | Cell wall               | beta-1,3-glucanase Glycosyl hydrolases family 17                                                                | unknown [Zea mays]                                                                                                                                                                                                                                         |  | up (3.3300,4.2900)     | up (3.9700,3.9500)     | 2 | 0 | 0 | 2 |
| SCCCLB2007D02.g | GS1_SS_40273_17948 | Cell wall metabolism | Other glycan degradation     | Cell wall               | pectinesterase family protein                                                                                   | hypothetical protein Osl_024553 [Oryza sativa (japonica cultivar-group)]                                                                                                                                                                                   |  |                        | down (-4.0600,-5.3200) | 0 | 1 | 0 | 1 |
| SCJFAM1069C01.g | GS1_SS_02484_19499 | Cell wall metabolism | Other glycan degradation     | Cell wall               | Glycoside hydrolase family 28 protein (polygalacturonase)                                                       | hypothetical protein Osl_006479 [Oryza sativa (indica cultivar-group)]                                                                                                                                                                                     |  |                        | down (-3.2400,-3.9500) | 0 | 1 | 0 | 1 |
| SCJLAM2093B10.g | GS1_SS_22322_21316 | Cell wall metabolism | Other glycan degradation     | Cell wall               | beta-1,3-glucanase Glycosyl hydrolases family 17                                                                | induced                                                                                                                                                                                                                                                    |  | down (-3.4000,-5.1300) | down (-5.7900,-5.9900) | 0 | 2 | 0 | 2 |
| SCJLRT1023E06.g | GS1_SS_12580_08945 | Cell wall metabolism | Other glycan degradation     | Cell wall               | beta-1,3-glucanase Glycosyl hydrolases family 17                                                                | pathogenesis-related protein 6 [Zea mays subsp. parviglumis]                                                                                                                                                                                               |  |                        | up (8.4100,6.2400)     | 1 | 0 | 0 | 1 |
| SCEQRT1026E05.g | GS1_SS_00904_10764 | Cell wall metabolism | Other glycan degradation     | Cell wall               | beta-1,3-glucanase Glycosyl hydrolases family 17                                                                | hypothetical protein Osl_005053 [Oryza sativa (indica cultivar-group)]                                                                                                                                                                                     |  |                        | up (5.7500,3.2900)     | 1 | 0 | 0 | 1 |
| SCEPRZ1009D10.g | GS1_SS_23462_16559 | Cell wall metabolism | Other glycan degradation     | Cell wall               | pectinesterase family protein                                                                                   | Os06g0193200 [Oryza sativa (japonica cultivar-group)] putative pectin methylesterase [Oryza sativa Japonica Group] Os06g0193200 [Oryza sativa (japonica cultivar-group)]                                                                                   |  | down (-3.8400,-3.9800) |                        | 0 | 1 | 0 | 1 |
| SCBGLR1113B02.g | GS1_SS_09971_00713 | Cell wall metabolism | others                       |                         | COBRA-like protein 2; Protein BRITTLE CULM1-like 2; 1,4-alpha-glucan branching enzyme (starch branching enzyme) | hypothetical protein Osl_010812 [Oryza sativa (japonica cultivar-group)]                                                                                                                                                                                   |  | up (4.1600,4.2200)     | up (3.3100,4.8300)     | 2 | 0 | 0 | 2 |
| SCCCLR1078D02.g | GS1_SS_16898_19287 | Cell wall metabolism | others                       | Carbohydrate metabolism | starch branching enzyme IIa [Zea mays]                                                                          | starch branching enzyme IIa [Zea mays]                                                                                                                                                                                                                     |  | down (-3.3600,-3.5400) |                        | 0 | 1 | 0 | 1 |
| SCCCL4015F12.g  | GS1_SS_24513_00878 | Cell wall metabolism | peptidase                    |                         | Basic 7S globulin; SBg7S; Bg; Basic 7S globulin high kDa subunit; Basic 7S globulin low kDa subunit;            | unknown [Zea mays]                                                                                                                                                                                                                                         |  |                        | up (3.8700,3.1600)     | 1 | 0 | 0 | 1 |
| SCEQLR1029E05.g | GS1_SS_15544_17574 | Cell wall metabolism | Phenylpropanoid biosynthesis | Cell wall               | Cinnamyl alcohol dehydrogenase (CAD)                                                                            | Mannitol dehydrogenase EC 1.1.2.2                                                                                                                                                                                                                          |  | down (-2.7700,-4.3300) | down (-3.6900,-3.1100) | 0 | 2 | 0 | 2 |
| SCCCL6024F07.g  | GS1_AS_25287_16689 | Cell wall metabolism | Phenylpropanoid biosynthesis | Cell wall               | Cinnamoyl-coA reductase (CCR)                                                                                   | Os02g0808800 [Oryza sativa (japonica cultivar-group)] cinnamoyl CoA reductase [Oryza sativa Japonica Group] cinnamoyl CoA reductase [Oryza sativa Japonica Group] Os02g0808800 [Oryza sativa (japonica cultivar-group)] hypothetical protein Osl_008505 [O |  | up (3.8100,4.0300)     |                        | 1 | 0 | 0 | 1 |

|                 |                    |                                      |                                      |                       |                                                                                                                                                                                                                                            |                                                                                                                                                                                                                                                            |                        |                        |   |   |   |   |
|-----------------|--------------------|--------------------------------------|--------------------------------------|-----------------------|--------------------------------------------------------------------------------------------------------------------------------------------------------------------------------------------------------------------------------------------|------------------------------------------------------------------------------------------------------------------------------------------------------------------------------------------------------------------------------------------------------------|------------------------|------------------------|---|---|---|---|
| SCCCL6024F07.g  | GS1_SS_25287_16690 | Cell wall metabolism                 | Phenylpropanoid biosynthesis         | Cell wall             | Cinnamoyl-coA reductase (CCR)                                                                                                                                                                                                              | Os02g0808800 [Oryza sativa (japonica cultivar-group)] cinnamoyl CoA reductase [Oryza sativa Japonica Group] cinnamoyl CoA reductase [Oryza sativa Japonica Group] Os02g0808800 [Oryza sativa (japonica cultivar-group)] hypothetical protein Osl_008505 [O | up (7.2400,5.5100)     | up (7.8300,7.3000)     | 2 | 0 | 0 | 2 |
| SCEQSB1C06D05.g | GS1_SS_36256_18097 | Cell wall metabolism                 | Phenylpropanoid biosynthesis         | Cell wall             | Cinnamoyl-coA reductase (CCR)                                                                                                                                                                                                              | cinnamoyl-CoA reductase [Saccharum officinarum]                                                                                                                                                                                                            | down (-2.4900,-6.8500) | down (-3.2800,-7.4200) | 0 | 2 | 0 | 2 |
| SCSGAM1094D05.g | GS1_SS_16141_17170 | Cell wall metabolism                 | Phenylpropanoid biosynthesis         | Cell wall             | phenylalanine ammonia-lyase (PAL)                                                                                                                                                                                                          | Phenylalanine ammonia-lyase                                                                                                                                                                                                                                | down (-2.0100,-2.8300) |                        | 0 | 1 | 0 | 1 |
| SCRUAD1064C10.g | GS1_SS_20738_18502 | Cell wall metabolism                 | Phenylpropanoid biosynthesis         | Cell wall             | putative ferulate 5 hydroxylase (F5H); flavonoid 3 hydroxylase (F3H)                                                                                                                                                                       | CYP75A6 (flavonoid 3l 5l-hydroxylase)                                                                                                                                                                                                                      | down (-2.6400,-4.2400) |                        | 0 | 1 | 0 | 1 |
| SCACHR1038E08.g | GS1_SS_24520_21449 | Cell wall metabolism                 | Phenylpropanoid biosynthesis         | Cell wall             | Cinnamyl alcohol dehydrogenase (CAD)                                                                                                                                                                                                       | Mannitol dehydrogenase (cytochrome) EC 1.1.2.2                                                                                                                                                                                                             |                        | down (-4.7000,-4.5900) | 0 | 1 | 0 | 1 |
| SCRFLR1034D04.g | GS1_SS_15437_21186 | Cell wall metabolism                 | Structural proteins of the cell wall | Cell wall             | Fasciclin-like arabinogalactan protein                                                                                                                                                                                                     | hypothetical protein LOC100192072 [Zea mays] unknown [Zea mays]                                                                                                                                                                                            | down (-2.0500,-5.4300) | down (-3.0000,-4.3100) | 0 | 2 | 0 | 2 |
| SCJLRZ3077F12.g | GS1_SS_16018_00210 | Cell wall metabolism                 | synthase                             |                       | Dehydrolchyl diphosphate synthase 2 (Dedol-PP synthase 2)                                                                                                                                                                                  | unknown [Zea mays]                                                                                                                                                                                                                                         | up (6.0000,4.9000)     | up (5.5200,4.8100)     | 2 | 0 | 0 | 2 |
| SCCCLR1048E10.g | GS1_SS_10115_00001 | Circadian Clock                      | nucleic acid binding                 | Transcription Factor  | MYB                                                                                                                                                                                                                                        | LHV/CCA1                                                                                                                                                                                                                                                   | up (4.5300,3.1300)     |                        | 1 | 0 | 0 | 1 |
| SCCCLR1066D01.g | GS1_SS_20048_09290 | Cytoskeleton and vesicle transport   | others                               |                       |                                                                                                                                                                                                                                            | hypothetical protein Osl_027041 [Oryza sativa (japonica cultivar-group)]                                                                                                                                                                                   |                        | down (-4.1800,-5.1800) | 0 | 1 | 0 | 1 |
| SCACLR2014H03.g | GS1_SS_18482_16104 | Cytoskeleton and vesicle transport   | SNARE                                | Stress                |                                                                                                                                                                                                                                            | ST3>ST1                                                                                                                                                                                                                                                    | down (-3.3000,-5.5900) |                        | 0 | 1 | 0 | 1 |
| SCACSD2018E08.g | GS1_SS_25481_14374 | Development                          | others                               |                       | Stem 28 kDa glycoprotein precursor (Vegetative storage protein A)                                                                                                                                                                          | unknown [Zea mays]                                                                                                                                                                                                                                         | down (-3.1500,-5.9000) | down (-5.9000,-5.7400) | 0 | 2 | 0 | 2 |
| SCBFSD2035E11.g | GS1_SS_25518_18146 | Development                          | others                               | Protein kinase        | undefined                                                                                                                                                                                                                                  | ZCN14 protein [Zea mays] ZCN14 [Zea mays] ZCN14 [Zea mays]                                                                                                                                                                                                 | up (3.1500,4.3300)     |                        | 1 | 0 | 0 | 1 |
| SCCCLR1080F11.g | GS1_SS_10285_01760 | Development                          | synthase                             | Secondary metabolism  | Acyl-CoA synthetases (AMP-forming)/AMP-acid ligases II                                                                                                                                                                                     | unknown [Zea mays]                                                                                                                                                                                                                                         | up (5.1700,5.1000)     | up (3.6200,5.7100)     | 2 | 0 | 0 | 2 |
| SCRUAD1132D09.g | GS1_SS_21620_12252 | Development                          | Uncharacterized                      | Stress                | cytochrome P450                                                                                                                                                                                                                            | CYP75A5 (flavonoid 3-monooxygenase / flavonoid 3-hydroxylase)                                                                                                                                                                                              |                        | up (3.5900,3.1800)     | 1 | 0 | 0 | 1 |
| SCUTRZ3071H01.g | GS1_SS_16511_04168 | DNA metabolism                       | helicase                             |                       | DEAD-box ATP-dependent RNA helicase 3                                                                                                                                                                                                      | unknown [Zea mays]                                                                                                                                                                                                                                         |                        | down (-4.3500,-3.5800) | 0 | 1 | 0 | 1 |
| SCCCRZ2C03C04.g | GS1_SS_09916_17814 | DNA metabolism                       | histone                              | Amino acid metabolism | Glutamine synthetase (Glutamate--ammonia ligase)                                                                                                                                                                                           | ST3>ST1                                                                                                                                                                                                                                                    | down (-2.8000,-3.6800) | down (-3.9500,-4.1900) | 0 | 2 | 0 | 2 |
| SCRURT2005G01.g | GS1_SS_03591_13833 | DNA metabolism                       | kinase/phosphatase                   |                       | Deoxycytidine kinase: dCK                                                                                                                                                                                                                  | unknown [Zea mays]                                                                                                                                                                                                                                         | down (-1.4600,-2.1200) | down (-2.3400,-7.6000) | 0 | 2 | 0 | 2 |
| SCQGL3050B07.g  | GS1_SS_22415_09054 | DNA metabolism                       | methyltransferase                    |                       | N(6)-adenine-specific DNA methyltransferase 2                                                                                                                                                                                              | unknown [Zea mays]                                                                                                                                                                                                                                         | down (-2.9800,-3.4000) |                        | 0 | 1 | 0 | 1 |
| SCJFRZ2014D06.g | GS1_SS_12278_15377 | DNA metabolism                       | transcription factor                 | Stress                | Water stress                                                                                                                                                                                                                               | induced                                                                                                                                                                                                                                                    | up (4.2300,3.9100)     | up (5.1200,3.6400)     | 2 | 0 | 0 | 2 |
| SCJFRT1058F06.g | GS1_AS_12277_00181 | DNA metabolism                       | transcription factor                 |                       | Protein ariadne-1 homolog; ARI-1; Ubiquitin-conjugating enzyme E2-binding protein 1; UbcH7-binding protein; UbcM4-interacting protein; HHAR1; H7-AP2; Monocyte protein 6; MOP-6                                                            | Os03g0233500 [Oryza sativa (japonica cultivar-group)] IBR domain containing protein, expressed [Oryza sativa (japonica cultivar-group)] Os03g0233500 [Oryza sativa (japonica cultivar-group)]                                                              | up (1.4700,1.6300)     |                        | 1 | 0 | 0 | 1 |
| SCJFRZ2014D06.g | GS1_AS_12278_15378 | DNA metabolism                       | transcription factor                 | Stress                | Water stress                                                                                                                                                                                                                               | induced                                                                                                                                                                                                                                                    | up (3.7500,3.0200)     |                        | 1 | 0 | 0 | 1 |
| SCJFLR1013E10.g | GS1_SS_03567_07008 | DNA metabolism                       | transcription factor                 |                       | RING finger and CHY zinc finger domain-containing protein 1; Zinc finger protein 363; CH-rich-interacting match with PLAG1; Androgen receptor N-terminal-interacting protein; p53-induced RING-H2 protein; hPirh2; RING finger protein 199 | unknown [Zea mays]                                                                                                                                                                                                                                         |                        | up (3.9200,5.3100)     | 1 | 0 | 0 | 1 |
| SCEPRT2048G05.g | GS1_SS_12965_16894 | DNA metabolism                       | transcription factor                 | Transcription Factor  | NAM                                                                                                                                                                                                                                        | NAC                                                                                                                                                                                                                                                        | up (2.7000,6.2900)     | up (2.9300,6.3600)     | 2 | 0 | 0 | 2 |
| SCSGFL1078F07.g | GS1_SS_20499_17914 | Flavonoid and anthocyanin metabolism | Reductase                            | Secondary metabolism  | TPA: putative anthocyanidin reductase                                                                                                                                                                                                      | hypothetical protein LOC100191338 [Zea mays] unknown [Zea mays]                                                                                                                                                                                            | down (-4.0500,-4.0700) |                        | 0 | 1 | 0 | 1 |
| SCBFRZ2017F11.g | GS1_SS_14694_03476 | Flavonoid and anthocyanin metabolism | Reductase                            |                       | Putative dihydroflavonol-4-reductase; DFR; Dihydrokaempferol 4-reductase                                                                                                                                                                   | unknown [Zea mays]                                                                                                                                                                                                                                         | up (2.5700,4.1800)     | up (5.0600,6.2700)     | 2 | 0 | 0 | 2 |

|                 |                    |                      |                       |                         |                                                                                                                                                                                                       |                                                                                                                                                                                       |  |                        |                        |   |   |   |   |
|-----------------|--------------------|----------------------|-----------------------|-------------------------|-------------------------------------------------------------------------------------------------------------------------------------------------------------------------------------------------------|---------------------------------------------------------------------------------------------------------------------------------------------------------------------------------------|--|------------------------|------------------------|---|---|---|---|
| SCACFL5031E06.g | GS1_SS_12320_13147 | Hormone biosynthesis | monooxygenase         |                         | Thiol-specific monooxygenase (Flavin-dependent monooxygenase)                                                                                                                                         | unknown [Zea mays]                                                                                                                                                                    |  |                        | down (-4.0000,-4.8000) | 0 | 1 | 0 | 1 |
| SCSFRT2070A10.g | GS1_SS_13887_16812 | Hormone biosynthesis | oxidoreductase        | Hormone biosynthesis    | Gibberellin                                                                                                                                                                                           | oxidases                                                                                                                                                                              |  |                        | down (-3.0300,-2.8500) | 0 | 1 | 0 | 1 |
| SCCCCL7C03G05.g | GS1_SS_21236_03669 | Hormone biosynthesis | oxygenase             |                         | Gibberellin 2-beta-dioxygenase; Gibberellin 2-beta-hydroxylase; Gibberellin 2-oxidase; GA 2-oxidase                                                                                                   | hypothetical protein Osl_003721 [Oryza sativa (indica cultivar-group)]                                                                                                                |  | up (5.9000,3.3200)     | up (3.9500,4.3100)     | 2 | 0 | 0 | 2 |
| SCCCCL7C03G05.g | GS1_AS_21236_03670 | Hormone biosynthesis | oxygenase             |                         | Gibberellin 2-beta-dioxygenase; Gibberellin 2-beta-hydroxylase; Gibberellin 2-oxidase; GA 2-oxidase                                                                                                   | hypothetical protein Osl_003721 [Oryza sativa (indica cultivar-group)]                                                                                                                |  | up (3.0800,3.5000)     |                        | 1 | 0 | 0 | 1 |
| SCVPRZ2041G12.g | GS1_SS_06726_11141 | Hormone biosynthesis | synthase              |                         | Probable indole-3-acetic acid-amido synthetase GH3.8; Auxin-responsive GH3-like protein 8; OsGH3-8 Probable indole-3-acetic acid-amido synthetase GH3.8; Auxin-responsive GH3-like protein 8; OsGH3-8 | indole-3-acetic acid amido synthetase [Zea mays]                                                                                                                                      |  | up (5.5300,3.2200)     |                        | 1 | 0 | 0 | 1 |
| SCAGFL8013F03.g | GS1_AS_25999_17044 | Hormone biosynthesis | synthase              | Hormone biosynthesis    | Gibberellin                                                                                                                                                                                           | synthases                                                                                                                                                                             |  |                        | down (-3.3600,-3.9200) | 0 | 1 | 0 | 1 |
| SCAGFL8013F03.g | GS1_SS_25999_17043 | Hormone biosynthesis | synthase              | Hormone biosynthesis    | Gibberellin                                                                                                                                                                                           | synthases                                                                                                                                                                             |  |                        | down (-3.2200,-3.6400) | 0 | 1 | 0 | 1 |
| SCCCCL3080B09.b | GS1_SS_05864_20064 | Hormone biosynthesis | synthase              | Transporters            | ABC transporter (ABC_tran)                                                                                                                                                                            | unknown [Zea mays]                                                                                                                                                                    |  |                        | up (8.1400,7.9100)     | 1 | 0 | 0 | 1 |
| SCCCCL3002B05.b | GS1_SS_05762_18529 | Hormone biosynthesis | synthase              | Hormone related         | auxin                                                                                                                                                                                                 | auxin-responsive GH3 family protein                                                                                                                                                   |  |                        | up (3.7900,4.2000)     | 1 | 0 | 0 | 1 |
| SCCST1002F06.g  | GS1_SS_24272_20208 | Light harvesting     | chlorophyll binding   | Carbohydrate metabolism | chlorophyll a/b binding protein (CAB)                                                                                                                                                                 | unknown [Zea mays]                                                                                                                                                                    |  |                        | down (-4.4200,-6.6400) | 0 | 1 | 0 | 1 |
| SCEZLR1031G02.g | GS1_SS_10424_20078 | Light harvesting     | chlorophyll binding   | Carbohydrate metabolism | chlorophyll a/b binding protein (CAB)                                                                                                                                                                 | unknown [Zea mays]                                                                                                                                                                    |  |                        | down (-4.6800,-5.9100) | 0 | 1 | 0 | 1 |
| SCJLST1022G06.g | GS1_SS_17806_20038 | Light harvesting     | chlorophyll binding   | Carbohydrate metabolism | chlorophyll a/b binding protein (CAB)                                                                                                                                                                 | photosystem II subunit29 [Zea mays] Chlorophyll a/b-binding protein CP29 precursor [Zea mays] unknown [Zea mays]                                                                      |  |                        | down (-4.4700,-5.5300) | 0 | 1 | 0 | 1 |
| SCBGLR1114G09.g | GS1_SS_08436_17742 | Light harvesting     | others                | Photosynthesis          | (O41048) Oxygen-evolving enhancer protein 3-1, chloroplast precursor (OEE3) (16 kDa subunit of oxyge                                                                                                  | Water stress repressed                                                                                                                                                                |  |                        | down (-4.6700,-6.9700) | 0 | 1 | 0 | 1 |
| SCJFAD1013H02.g | GS1_SS_17135_14149 | Light harvesting     | photosystem I subunit |                         |                                                                                                                                                                                                       | unknown [Zea mays] unknown [Zea mays]                                                                                                                                                 |  | down (-2.5900,-4.5900) | down (-4.3300,-5.8800) | 0 | 2 | 0 | 2 |
| SCQGLR1085G01.g | GS1_SS_25636_20097 | Light harvesting     | photosystem I subunit | Photosynthesis          | (O00327) Photosystem I reaction center subunit V, chloroplast precursor (PSI-G) (Photosystem I 9 kDa                                                                                                  | unknown [Zea mays]                                                                                                                                                                    |  |                        | down (-5.2400,-6.8900) | 0 | 1 | 0 | 1 |
| SCQGLR1085G01.g | GS1_AS_25636_20096 | Light harvesting     | photosystem I subunit | Photosynthesis          | (O00327) Photosystem I reaction center subunit V, chloroplast precursor (PSI-G) (Photosystem I 9 kDa                                                                                                  | unknown [Zea mays]                                                                                                                                                                    |  |                        | down (-4.2400,-3.9900) | 0 | 1 | 0 | 1 |
| SCQGLR2025B12.g | GS1_SS_07917_21846 | Light harvesting     | PSI reaction center   | Photosynthesis          | (P23993) Photosystem I reaction center subunit XI, chloroplast precursor (PSI-L) (PSI subunit V)                                                                                                      | Water stress repressed                                                                                                                                                                |  |                        | down (-4.2100,-4.8800) | 0 | 1 | 0 | 1 |
| SCUTLR2008B06.g | GS1_SS_25626_19632 | Light harvesting     | PSI reaction center   | Photosynthesis          | (O84PB5) Photosystem I protein-like protein                                                                                                                                                           | Water stress repressed                                                                                                                                                                |  |                        | down (-3.8100,-4.3900) | 0 | 1 | 0 | 1 |
| SCSBS2029H02.g  | GS1_SS_26118_19348 | Light harvesting     | rubredoxin            | Bioenergetics           | Ferredoxin-1, chloroplastic; Ferredoxin I; Fd I;                                                                                                                                                      | Ferredoxin I, chloroplast precursor (Fd I) pir     T03286 ferredoxin [2Fe-2S] - maize gb   AAA33459.1   ferredoxin gb   AAA33460.1   ferredoxin prf     1907324B ferredoxin:ISOTYPE=I |  |                        | down (-3.6900,-7.4400) | 0 | 1 | 0 | 1 |
| SCSGAM2078C07.g | GS1_AS_05162_06150 | Light harvesting     | rubredoxin            |                         | Ferredoxin                                                                                                                                                                                            | putative ferredoxin [Zea mays] unknown [Zea mays]                                                                                                                                     |  | down (-2.9100,-2.9400) | down (-5.9300,-6.4400) | 0 | 2 | 0 | 2 |
| SCRFHR1006G03.g | GS1_SS_04426_12879 | Light harvesting     | uncharacterized       |                         | Chemocyanin precursor (Basic blue protein) (Plantacyanin)                                                                                                                                             | unknown [Zea mays]                                                                                                                                                                    |  |                        | up (4.2100,3.6400)     | 1 | 0 | 0 | 1 |
| SCSFLR2031F07.g | GS1_AS_15904_05746 | Light harvesting     | Uncharacterized       |                         | PsbP-like protein 1, chloroplastic; PsbP-related thylakoid luminal protein 2; OEC23-like protein 4;                                                                                                   | unknown [Zea mays]                                                                                                                                                                    |  | up (2.8900,2.6900)     | up (3.7200,3.8100)     | 2 | 0 | 0 | 2 |
| SCUTSB1076D12.g | GS1_SS_17469_11499 | Light harvesting     | uncharacterized       |                         | Thylakoid luminal protein At1g03610, chloroplastic;                                                                                                                                                   | unknown [Zea mays]                                                                                                                                                                    |  |                        | down (-3.9900,-5.4900) | 0 | 1 | 0 | 1 |
| SCRFLL5043E04.g | GS1_SS_23199_16513 | Light harvesting     | Uncharacterized       | Photosynthesis          | (O7YJV0) PSII T protein                                                                                                                                                                               | PSII T-protein [Vitis vinifera]                                                                                                                                                       |  |                        | down (-2.9700,-3.5200) | 0 | 1 | 0 | 1 |



|                 |                    |                  |                   |                                             |                                                                                                                                                                                             |                                                                                                                                                                                                            |  |                        |                        |   |   |   |   |
|-----------------|--------------------|------------------|-------------------|---------------------------------------------|---------------------------------------------------------------------------------------------------------------------------------------------------------------------------------------------|------------------------------------------------------------------------------------------------------------------------------------------------------------------------------------------------------------|--|------------------------|------------------------|---|---|---|---|
| SCVPLR2005B02.g | GS1_SS_09568_10302 | Light harvesting | Uncharacterized   |                                             | PsbP domain-containing protein 1, chloroplastic; PsbP-related thylakoid lumenal protein 1; OEC23-like protein 3;                                                                            | unknown [Zea mays]                                                                                                                                                                                         |  | down (-2.5600,-2.6200) | down (-3.1600,-3.0200) | 0 | 2 | 0 | 2 |
| SCRLAM1006E01.g | GS1_SS_03023_14908 | Light harvesting | Uncharacterized   | Stress                                      |                                                                                                                                                                                             | repressed                                                                                                                                                                                                  |  | down (-3.7400,-3.0900) | down (-4.5300,-5.1700) | 0 | 2 | 0 | 2 |
| SCEZSD1083H01.g | GS1_SS_25828_08824 | Lipid metabolism | acyltransferase   |                                             | 3-ketoacyl-CoA synthase 11; KCS-11; Very long-chain fatty acid condensing enzyme 11; VLCFA condensing enzyme 11                                                                             | unknown [Zea mays]                                                                                                                                                                                         |  |                        | up (3.1600,3.8400)     | 1 | 0 | 0 | 1 |
| SCCCL7038A10.g  | GS1_AS_26014_04520 | Lipid metabolism | acyltransferase   |                                             | 1-acylglycerophosphocholine O-acyltransferase 1; Acyltransferase-like 2                                                                                                                     | unknown [Zea mays]                                                                                                                                                                                         |  |                        | up (3.6000,3.7000)     | 1 | 0 | 0 | 1 |
| SCEPSB1136F09.g | GS1_SS_21332_12694 | Lipid metabolism | acyltransferase   |                                             | Glycerol-3-phosphate acyltransferase 1; AtGPAT1                                                                                                                                             | hypothetical protein Osl_002910 [Oryza sativa (indica cultivar-group)]                                                                                                                                     |  |                        | up (6.5600,4.6000)     | 1 | 0 | 0 | 1 |
| SCRLF1011A02.g  | GS1_SS_19918_18280 | Lipid metabolism | acyltransferase   | Lipid, fatty-acid and isoprenoid metabolism |                                                                                                                                                                                             | unknown [Zea mays]                                                                                                                                                                                         |  | up (5.0200,4.2700)     | up (5.4600,4.5900)     | 2 | 0 | 0 | 2 |
| SCEZAM2058C09.g | GS1_SS_04238_10821 | Lipid metabolism | acyltransferase   |                                             | 2-acylglycerol O-acyltransferase 1; Monoacylglycerol O-acyltransferase 1; Acyl CoA:monoacylglycerol acyltransferase 1; MGAT1                                                                | hypothetical protein Osl_021982 [Oryza sativa (indica cultivar-group)]                                                                                                                                     |  |                        | up (5.2000,4.2000)     | 1 | 0 | 0 | 1 |
| SCEZFL5089C05.g | GS1_SS_23691_13712 | Lipid metabolism | Acyltransferases  |                                             | Glycerol-3-phosphate acyltransferase 1; AtGPAT1                                                                                                                                             | hypothetical protein Osl_001483 [Oryza sativa (indica cultivar-group)] hypothetical protein Osl_001387 [Oryza sativa (japonica cultivar-group)]                                                            |  |                        | up (5.9600,5.3000)     | 1 | 0 | 0 | 1 |
| SCVPAM1059B02.g | GS1_SS_03228_16743 | Lipid metabolism | dehydrogenase     | Hormone biosynthesis                        | jasmonic acid                                                                                                                                                                               | Omega-6 fatty acid desaturase                                                                                                                                                                              |  |                        | down (-3.1000,-4.0400) | 0 | 1 | 0 | 1 |
| SCJFRT1005C01.g | GS1_SS_19690_19234 | Lipid metabolism | dehydrogenase     | Lipid, fatty-acid and isoprenoid metabolism | Putative 3-hydroxybutyryl-CoA dehydrogenase                                                                                                                                                 | unknown [Zea mays]                                                                                                                                                                                         |  |                        | up (2.9100,3.5100)     | 1 | 0 | 0 | 1 |
| SCSGHR1072E12.g | GS1_SS_20554_02815 | Lipid metabolism | hydrolase         |                                             | Abhydrolase domain-containing protein 6-A                                                                                                                                                   | unknown [Zea mays]                                                                                                                                                                                         |  |                        | up (4.5700,5.0500)     | 1 | 0 | 0 | 1 |
| SCJFRT1009B01.g | GS1_SS_12614_15929 | Lipid metabolism | hydrolase         | Carbohydrate metabolism                     | patatin-like protein                                                                                                                                                                        | unknown [Zea mays]                                                                                                                                                                                         |  | down (-2.6100,-3.8800) |                        | 0 | 1 | 0 | 1 |
| SCQSRT1035D04.g | GS1_SS_12740_19911 | Lipid metabolism | ligase            | Lipid, fatty-acid and isoprenoid metabolism | Long-chain-fatty-acid-CoA ligase 5 (EC 6.2.1.3) (Long-chain acyl-CoA synthetase 5) (LACS 5)                                                                                                 | unknown [Zea mays]                                                                                                                                                                                         |  |                        | up (4.0700,3.4600)     | 1 | 0 | 0 | 1 |
| SCCCLR2004B05.g | GS1_SS_11262_13810 | Lipid metabolism | lipase            |                                             | Non-specific lipid-transfer protein 2; nsLTP2; 7 kDa lipid transfer protein;                                                                                                                | unknown [Zea mays]                                                                                                                                                                                         |  |                        | down (-3.5500,-3.8500) | 0 | 1 | 0 | 1 |
| SCCCR22C03B01.g | GS1_SS_22871_13852 | Lipid metabolism | lipase            |                                             | Anther-specific proline-rich protein APG; Protein CEX                                                                                                                                       | unknown [Zea mays]                                                                                                                                                                                         |  |                        | up (3.2300,4.5300)     | 1 | 0 | 0 | 1 |
| SCJFRT1007H07.g | GS1_SS_20498_19027 | Lipid metabolism | lipoygenase       | Hormone biosynthesis                        | jasmonic acid                                                                                                                                                                               | Lipoxygenase                                                                                                                                                                                               |  |                        | down (-3.1100,-6.3100) | 0 | 1 | 0 | 1 |
| SCBFRZ2045A12.g | GS1_SS_14710_13413 | Lipid metabolism | methyltransferase |                                             | Phosphoethanolamine N-methyltransferase 1; PEAMT 1; AtNMT1                                                                                                                                  | S-adenosyl-L-methionine: phosphoethanolamine N-methyltransferase [Zea mays]                                                                                                                                |  |                        | down (-4.7200,-5.2100) | 0 | 1 | 0 | 1 |
| SCCCRT1002E01.g | GS1_SS_08457_17376 | Lipid metabolism | others            | Lipid, fatty-acid and isoprenoid metabolism | Putative stearoyl-acyl carrier protein desaturase                                                                                                                                           | unknown [Zea mays]                                                                                                                                                                                         |  |                        | up (2.9100,6.2700)     | 1 | 0 | 0 | 1 |
| SCCCRT1001E01.g | GS1_SS_21695_20802 | Lipid metabolism | others            | Hormone biosynthesis                        | jasmonic acid                                                                                                                                                                               | Lipoxygenase                                                                                                                                                                                               |  | down (-4.2700,-6.7100) |                        | 0 | 1 | 0 | 1 |
| SCCCRT1001E01.g | GS1_AS_21695_20801 | Lipid metabolism | others            | Hormone biosynthesis                        | jasmonic acid                                                                                                                                                                               | Lipoxygenase                                                                                                                                                                                               |  | down (-1.9300,-2.8500) |                        | 0 | 1 | 0 | 1 |
| SCSBAM1085B06.g | GS1_SS_15769_16971 | Lipid metabolism | oxidoreductase    | lipid metabolism                            | Omega-3 fatty acid desaturase, chloroplastic;                                                                                                                                               | Omega-3 fatty acid desaturase                                                                                                                                                                              |  | down (-2.6600,-4.3600) |                        | 0 | 1 | 0 | 1 |
| SCCCLR1024H09.g | GS1_SS_05820_20315 | Lipid metabolism | Reductase         | Lipid, fatty-acid and isoprenoid metabolism | Enoyl-[acyl-carrier protein] reductase [NADH], chloroplast precursor (EC 1.3.1.9) (NADH-dep                                                                                                 | unknown [Zea mays]                                                                                                                                                                                         |  | down (-2.8600,-4.1000) |                        | 0 | 1 | 0 | 1 |
| SCACRZ3109F05.g | GS1_SS_15295_16602 | Lipid metabolism | synthase          | Lipid, fatty-acid and isoprenoid metabolism |                                                                                                                                                                                             | unknown [Zea mays]                                                                                                                                                                                         |  |                        | down (-3.6500,-4.2400) | 0 | 1 | 0 | 1 |
| SCRFAM2070B12.g | GS1_SS_04825_11625 | Lipid metabolism | synthase          |                                             | Cyclopropane-fatty-acyl-phospholipid synthase; Cyclopropane fatty acid synthase; CFA synthase Cyclopropane-fatty-acyl-phospholipid synthase; Cyclopropane fatty acid synthase; CFA synthase | Os12g0267200 [Oryza sativa (japonica cultivar-group)] cyclopropane fatty acid synthase, putative, expressed [Oryza sativa (japonica cultivar-group)] Os12g0267200 [Oryza sativa (japonica cultivar-group)] |  | up (3.3900,6.9200)     | up (5.1800,5.8600)     | 2 | 0 | 0 | 2 |
| SCAGAM2016B02.g | GS1_SS_02699_02548 | Lipid metabolism | synthase          |                                             | Dehydrololichyl diphosphate synthase 2 (Dedol-PP synthase 2)                                                                                                                                | unknown [Zea mays]                                                                                                                                                                                         |  | down (-2.9900,-4.1900) |                        | 0 | 1 | 0 | 1 |
| SCVPLR2005H09.g | GS1_SS_11666_17875 | Lipid metabolism | synthase          | Lipid, fatty-acid and isoprenoid metabolism | 3-oxoacyl-[acyl-carrier-protein] synthase I                                                                                                                                                 | hypothetical protein LOC100193451 [Zea mays] unknown [Zea mays]                                                                                                                                            |  |                        | down (-4.9900,-4.7700) | 0 | 1 | 0 | 1 |

|                 |                    |                                      |                              |                                             |                                                                                                                        |                                                                                                                                                                                                           |                        |                                                  |  |   |   |   |   |
|-----------------|--------------------|--------------------------------------|------------------------------|---------------------------------------------|------------------------------------------------------------------------------------------------------------------------|-----------------------------------------------------------------------------------------------------------------------------------------------------------------------------------------------------------|------------------------|--------------------------------------------------|--|---|---|---|---|
| SCCCLR1C07E01.g | GS1_SS_00496_16485 | Lipid metabolism                     | transferase                  | Lipid, fatty-acid and isoprenoid metabolism | putative sulfolipid synthase                                                                                           | unknown [Zea mays]                                                                                                                                                                                        | down (-2.9200,-1.6700) |                                                  |  | 0 | 1 | 0 | 1 |
| SCMCLR1123C11.g | GS1_SS_10812_04628 | Lipid metabolism                     | translocon                   |                                             | Transmembrane protein 56-B                                                                                             | hypothetical protein LOC100194195 [Zea mays]<br>unknown [Zea mays]                                                                                                                                        |                        | up (3.1800,3.9600)                               |  | 1 | 0 | 0 | 1 |
| SCUTLR1037G02.g | GS1_SS_24077_16084 | Maintenance of genetic material      | DNA methylase                | Chromatin regulation                        | chromomethylase CMT3 (cytosine methyltransferase)                                                                      | DNA (cytosine-5)-methyltransferase 3; Chromomethylase 3; DNA methyltransferase 105 DNA methyltransferase 105 [Zea mays]                                                                                   |                        | down (-5.5700,-5.6900)                           |  | 0 | 1 | 0 | 1 |
| SCQGAM1048F02.g | GS1_SS_02913_06742 | Maintenance of genetic material      | Helicase                     |                                             | DEAD-box ATP-dependent RNA helicase 25                                                                                 | Os01g0618400 [Oryza sativa (japonica cultivar-group)] DEAD-box ATP-dependent RNA helicase 25 putative RNA helicase [Oryza sativa Japonica Group]<br>Os01g0618400 [Oryza sativa (japonica cultivar-group)] |                        | down (-4.6100,-4.4000)<br>down (-4.8400,-4.1900) |  | 0 | 2 | 0 | 2 |
| SCVPRT2075A05.g | GS1_SS_05292_13126 | Maintenance of genetic material      | Replication / Helicase       |                                             |                                                                                                                        | hypothetical protein Osl_032804 [Oryza sativa (japonica cultivar-group)]                                                                                                                                  |                        | down (-2.8100,-5.0300)                           |  | 0 | 1 | 0 | 1 |
| SCACLR1036A01.g | GS1_SS_25218_11290 | Maintenance of genetic material      | Ribosomal Protein            |                                             | H/ACA ribonucleoprotein complex subunit 2-like protein; Nhp2-like protein                                              | unknown [Zea mays]                                                                                                                                                                                        |                        | down (-2.5300,-3.3200)                           |  | 0 | 1 | 0 | 1 |
| SCEQLR1007G09.g | GS1_SS_09074_09344 | Maintenance of genetic material      | SSB                          |                                             | Single-stranded DNA-binding protein; SSB; Helix-destabilizing protein                                                  | unknown [Zea mays]                                                                                                                                                                                        |                        | down (-2.8200,-3.8500)                           |  | 0 | 1 | 0 | 1 |
| SCCCCL5004A02.g | GS1_SS_05548_12185 | Maintenance of genetic material      |                              |                                             | Transcription factor bHLH47 OS=Arabidopsis thaliana GN=BHLH47 PE=2 SV=1                                                | unknown [Zea mays]                                                                                                                                                                                        |                        | up (4.0700,3.4300)                               |  | 1 | 0 | 0 | 1 |
| SCCCST1008B08.g | GS1_SS_03268_18427 | Maintenance of genetic material      |                              | Nucleic acid metabolism                     | mRNA processing                                                                                                        | Probable splicing factor 3B subunit 5 (SF3b5) (Pre-mRNA splicing factor SF3b 10 kDa subunit                                                                                                               |                        | down (-4.7600,-7.7500)                           |  | 0 | 1 | 0 | 1 |
| SCBFRZ2050A05.g | GS1_SS_23457_16388 | Maintenance of genetic material      |                              | Nucleic acid metabolism                     | regulation of transcription, DNA-dependent                                                                             | Probable WRKY transcription factor 19 (WRKY DNA-binding protein 19)                                                                                                                                       |                        | down (-2.2100,-3.6400)                           |  | 0 | 1 | 0 | 1 |
| SCMCRT2087B02.g | GS1_SS_07198_13237 | Modification and protein degradation | cysteine protease inhibitors |                                             | Cysteine proteinase inhibitor 8; Oryzacystatin-8; Oryzacystatin VIII; OC-VIII;                                         | putative cystatin [Zea mays] IPA; putative cystatin [Zea mays] putative cystatin [Zea mays] unknown [Zea mays]                                                                                            |                        | up (6.1200,5.2400)                               |  | 1 | 0 | 0 | 1 |
| SCCCCL4005G05.g | GS1_SS_18344_01636 | Modification and protein degradation | histone                      |                                             | Small heat shock protein, chloroplastic; Heat shock protein 26.6;                                                      | heat shock protein26 [Zea mays] heat shock protein 26 [Zea mays] unknown [Zea mays] unknown [Zea mays] heat shock protein 26                                                                              |                        | up (2.8700,6.3900)                               |  | 1 | 0 | 0 | 1 |
| SCCCLB1023F09.g | GS1_SS_23196_15971 | Modification and protein degradation | peptidase                    | Protein metabolism                          | Cathepsin B (Fragment)                                                                                                 | unknown [Zea mays]                                                                                                                                                                                        |                        | up (4.0900,4.9300)                               |  | 1 | 0 | 0 | 1 |
| SCMCRZ3068D09.g | GS1_SS_16077_11938 | Modification and protein degradation | ubiquitin                    |                                             | FAS-associated factor 2-A; UBX domain-containing protein 8-A                                                           | unknown [Zea mays]                                                                                                                                                                                        |                        | down (-4.5200,-3.7500)                           |  | 0 | 1 | 0 | 1 |
| SCACST3159D04.g | GS1_SS_18393_15001 | Nucleotide metabolism                | dehydrogenase                | Nucleic acid metabolism                     | Nucleotide metabolism                                                                                                  | Inosine monophosphate dehydrogenase                                                                                                                                                                       |                        | up (3.4600,4.7700)                               |  | 1 | 0 | 0 | 1 |
| SCSGLV1007A08.g | GS1_SS_26112_06519 | Nucleotide metabolism                | hydrolase                    |                                             | Guanosine-3',5'-bis(diphosphate) 3'-pyrophosphohydrolase; Pentaphosphate guanosine-3'-pyrophosphohydrolase; (ppGpp)ase | unknown [Zea mays]                                                                                                                                                                                        |                        | up (2.3900,3.0000)                               |  | 1 | 0 | 0 | 1 |
| SCCCCL4003D09.g | GS1_SS_05986_00413 | Nucleotide metabolism                | hydrolase                    |                                             | Probable AMP deaminase                                                                                                 | hypothetical protein Osl_026471 [Oryza sativa (indica cultivar-group)]                                                                                                                                    |                        | up (3.6900,3.3100)                               |  | 1 | 0 | 0 | 1 |
| SCJFFL3C07G04.g | GS1_SS_22696_12722 | Nucleotide metabolism                | kinase/phosphatase           |                                             | Uridylate kinase; UK; Uridine monophosphate kinase; UMP kinase; UMP/CMP kinase                                         | unknown [Zea mays]                                                                                                                                                                                        |                        | up (2.5300,3.0200)<br>up (3.2700,3.2000)         |  | 2 | 0 | 0 | 2 |
| SCCCRZ2C03C09.g | GS1_SS_03914_01548 | Nucleotide metabolism                | others                       |                                             | Probable AMP deaminase                                                                                                 | Os05g0349200 [Oryza sativa (japonica cultivar-group)]<br>Os05g0349200 [Oryza sativa (japonica cultivar-group)]                                                                                            |                        | down (-3.7100,-3.9800)                           |  | 0 | 1 | 0 | 1 |
| SCJFHR1C05B12.b | GS1_SS_08020_12067 | Nucleotide metabolism                | Reductase                    |                                             |                                                                                                                        |                                                                                                                                                                                                           |                        | up (7.1400,6.9300)<br>up (5.9500,6.9600)         |  | 2 | 0 | 0 | 2 |
| SCSFLR2024H10.g | GS1_SS_11606_14655 | Nucleotide metabolism                | Transferase family           | Nucleic acid metabolism                     | regulation of transcription, DNA-dependent                                                                             | Transcription factor IIIC102                                                                                                                                                                              |                        | down (-3.2600,-3.3400)                           |  | 0 | 1 | 0 | 1 |
| SCQGST1034G07.g | GS1_SS_23697_16335 | Nucleotide metabolism                | Transporters                 | Nucleic acid metabolism                     | regulation of transcription, DNA-dependent                                                                             | Glycine-rich protein 2                                                                                                                                                                                    |                        | down (-2.2900,-3.3200)                           |  | 0 | 1 | 0 | 1 |

|                 |                    |        |                                |           |                                                                                                                              |                                                                                                                |                                                                                                                                                                                                                                                            |                    |                        |   |   |   |   |
|-----------------|--------------------|--------|--------------------------------|-----------|------------------------------------------------------------------------------------------------------------------------------|----------------------------------------------------------------------------------------------------------------|------------------------------------------------------------------------------------------------------------------------------------------------------------------------------------------------------------------------------------------------------------|--------------------|------------------------|---|---|---|---|
| SCEZRT2015F08.g | GS1_SS_19147_05948 | Others | acetyl-CoA synthetase          |           | Fatty acyl-CoA synthetase; Long-chain-fatty-acid--CoA synthetase 1; Long chain fatty acyl coenzyme A-synthetase 1; LC-FACS 1 | Os01g0655800 [Oryza sativa (japonica cultivar-group)]<br>Os01g0655800 [Oryza sativa (japonica cultivar-group)] |                                                                                                                                                                                                                                                            | up (2.1200,2.3900) |                        | 1 | 0 | 0 | 1 |
| SCCST2003C12.g  | GS1_SS_08764_21659 | Others | Alcohol dehydrogenase          | Cell wall | Carbohydrate metabolism                                                                                                      | Pentose and Glucuronate interconversions                                                                       | Alcohol dehydrogenase(NADP+) EC 1.1.1.2                                                                                                                                                                                                                    |                    | up (3.6500,3.4500)     | 1 | 0 | 0 | 1 |
| SCCCL2001H01.b  | GS1_SS_05710_02918 | Others | amidotransferase               |           |                                                                                                                              | Stem-specific protein TSJT1                                                                                    | expressed protein [Oryza sativa (japonica cultivar-group)] Stem-specific protein TSJT1, putative, expressed [Oryza sativa (japonica cultivar-group)]                                                                                                       |                    | up (2.8600,6.2500)     | 1 | 0 | 0 | 1 |
| SCCCLR1075B06.g | GS1_SS_10234_14797 | Others | bacteria                       |           | Photosynthesis                                                                                                               | (Q40070) Photosystem II 10 kDa polypeptide, chloroplast precursor                                              | putative Photosystem II 10 kDa polypeptide, chloroplast precursor [Oryza sativa Japonica Group]                                                                                                                                                            |                    | up (8.2300,5.4000)     | 1 | 0 | 0 | 1 |
| SCCCLR1075B06.g | GS1_AS_10234_14796 | Others | bacteria                       |           | Photosynthesis                                                                                                               | (Q40070) Photosystem II 10 kDa polypeptide, chloroplast precursor                                              | putative Photosystem II 10 kDa polypeptide, chloroplast precursor [Oryza sativa Japonica Group]                                                                                                                                                            |                    | up (3.1500,3.7500)     | 1 | 0 | 0 | 1 |
| SCAGAM2126B01.g | GS1_SS_03766_02179 | Others | chaperon                       |           |                                                                                                                              | Probable mitochondrial chaperone bcs1 (BCS1-like protein)                                                      | putative AAA-type ATPase [Oryza sativa (japonica cultivar-group)] hypothetical protein Osl_018939 [Oryza sativa (japonica cultivar-group)]                                                                                                                 |                    | up (4.6300,4.3400)     | 1 | 0 | 0 | 1 |
| SCQHR1013B08.g  | GS1_SS_07579_19807 | Others | copper ion binding             |           | Bioenergetics                                                                                                                | Blue copper protein;                                                                                           | dbj BAD03078.1  putative blue copper binding protein [Oryza sativa (japonica cultivar-group)]                                                                                                                                                              |                    | down (-2.5900,-4.0500) | 0 | 1 | 0 | 1 |
| SCEPRZ1008H10.g | GS1_SS_21614_21828 | Others | cytochrome                     |           | Stress                                                                                                                       | Cytochrome P450                                                                                                | Cyp only                                                                                                                                                                                                                                                   |                    | up (3.0800,3.3300)     | 1 | 0 | 0 | 1 |
| SCJLRT1022A05.g | GS1_SS_31358_16707 | Others | cytochrome P450 family protein |           | Stress                                                                                                                       | Cytochrome P450                                                                                                | Cyp only                                                                                                                                                                                                                                                   |                    | down (-2.4400,-3.1700) | 0 | 1 | 0 | 1 |
| SCEQRT1025C04.g | GS1_SS_11924_18787 | Others | cytochrome P450 family protein |           | Stress                                                                                                                       | Cytochrome P450                                                                                                | Cyp only                                                                                                                                                                                                                                                   |                    | up (6.2600,5.8700)     | 1 | 0 | 0 | 1 |
| SCRFAD1024F09.g | GS1_SS_11822_15203 | Others | cytochrome P450 family protein |           | Stress                                                                                                                       | Cytochrome P450                                                                                                | Cyp only                                                                                                                                                                                                                                                   |                    | up (3.6700,5.1100)     | 1 | 0 | 0 | 1 |
| SCEPSD1071E01.g | GS1_SS_25562_18811 | Others | cytochrome P450 family protein |           | Stress                                                                                                                       | cytochrome P450                                                                                                | CYP81B1                                                                                                                                                                                                                                                    |                    | up (4.1700,3.1200)     | 1 | 0 | 0 | 1 |
| SCSBSD2029E08.g | GS1_SS_25567_05330 | Others | cytochrome P450 family protein |           |                                                                                                                              | Tyrosine N-monoxygenase; Cytochrome P450Tyr; Cytochrome P450 79A1                                              | unknown [Zea mays]                                                                                                                                                                                                                                         |                    | up (6.2800,5.4600)     | 1 | 0 | 0 | 1 |
| SCCCLB1C06G11.g | GS1_SS_08946_07668 | Others | cytochrome P450 family protein |           |                                                                                                                              | O-methyltransferase ZRP4 (OMT)                                                                                 | hypothetical protein Osl_035164 [Oryza sativa (indica cultivar-group)]                                                                                                                                                                                     |                    | down (-2.9300,-3.2800) | 0 | 1 | 0 | 1 |
| SCJFRZ2030D03.g | GS1_SS_14939_21284 | Others | cytochrome P450 family protein | Cell wall | Stress                                                                                                                       | Cytochrome P450                                                                                                | Cyp only                                                                                                                                                                                                                                                   |                    | up (4.7300,4.9000)     | 1 | 0 | 0 | 1 |
| SCVPRZ3030D01.g | GS1_SS_18238_16749 | Others | cytochrome P450 family protein | Cell wall | Stress                                                                                                                       | Cytochrome P450                                                                                                | Cyp only                                                                                                                                                                                                                                                   |                    | down (-3.2300,-3.2600) | 0 | 1 | 0 | 1 |
| SCCCLR2003C05.g | GS1_SS_10887_09804 | Others | cytochrome P450 family protein | Cell wall |                                                                                                                              | Cytochrome P450 87A3                                                                                           | OSIGBa0111L12.4 [Oryza sativa (indica cultivar-group)]                                                                                                                                                                                                     |                    | down (-6.8400,-6.0600) | 0 | 1 | 0 | 1 |
| SCSFRT2067G11.g | GS1_SS_13860_18733 | Others | cytochrome P450 family protein | Cell wall | Development                                                                                                                  | ripening                                                                                                       | Cytochrome P450 71A1 (EC 1.14.-.-) (CYPLXXIA1) (ARP-2)                                                                                                                                                                                                     |                    | down (-3.7500,-3.8200) | 0 | 1 | 0 | 1 |
| SCBFLR1005H06.g | GS1_SS_16572_16695 | Others | cytochrome P450 family protein | Cell wall | Stress                                                                                                                       | Cytochrome P450                                                                                                | Cyp only                                                                                                                                                                                                                                                   |                    | down (-5.8300,-4.6500) | 0 | 1 | 0 | 1 |
| SCCCL3003H04.b  | GS1_SS_05809_16045 | Others | cytochrome P450 family protein | Cell wall | Stress                                                                                                                       | Cytochrome P450                                                                                                | Cyp only                                                                                                                                                                                                                                                   |                    | up (3.7100,4.2500)     | 1 | 0 | 0 | 1 |
| SCQGLR1087A09.g | GS1_SS_10900_18569 | Others | dehydrogenase                  |           | Secondary metabolism                                                                                                         | steroid 5 alpha-reductase 2-like; H5AR gene; steroid 5 alpha-reductase 2 like                                  | Os04g0576800 [Oryza sativa (japonica cultivar-group)] OSJNBa0020J04.7 [Oryza sativa (japonica cultivar-group)] Os04g0576800 [Oryza sativa (japonica cultivar-group)] hypothetical protein Osl_016479 [Oryza sativa (indica cultivar-group)] hypothetical p |                    | up (3.9600,3.8600)     | 1 | 0 | 0 | 1 |

|                 |                    |        |                      |                         |                                                                                                                                                                                                                                           |                                                                                                                                                                                                                                                          |  |                        |                        |   |   |   |   |
|-----------------|--------------------|--------|----------------------|-------------------------|-------------------------------------------------------------------------------------------------------------------------------------------------------------------------------------------------------------------------------------------|----------------------------------------------------------------------------------------------------------------------------------------------------------------------------------------------------------------------------------------------------------|--|------------------------|------------------------|---|---|---|---|
| SCQGAM2108C06.g | GS1_SS_04628_10900 | Others | dehydrogenase        |                         | Lipoamide acyltransferase component of branched-chain alpha-keto acid dehydrogenase complex, mitochondrial; Dihydrolipoylysine-residue (2-methylpropanoyl)transferase; Dihydroipoamide branched chain transacylase; BCKAD E2 subunit; E2; | unknown [Zea mays]                                                                                                                                                                                                                                       |  |                        | up (5.5800,4.9800)     | 1 | 0 | 0 | 1 |
| SCEQLR1092B06.g | GS1_SS_00037_14514 | Others | electron carrier     |                         | Rubredoxin 1; Rd-1                                                                                                                                                                                                                        | unknown [Zea mays]                                                                                                                                                                                                                                       |  |                        | down (-4.0100,-5.1200) | 0 | 1 | 0 | 1 |
| SCJFRT2054F10.b | GS1_SS_13329_08859 | Others | Flavonoides          |                         | 3-ketoacyl-CoA synthase 11; KCS-11; Very long-chain fatty acid condensing enzyme 11; VLCFA condensing enzyme 11                                                                                                                           | unknown [Zea mays]                                                                                                                                                                                                                                       |  |                        | up (3.9500,5.1000)     | 1 | 0 | 0 | 1 |
| SCSGAD1006B03.g | GS1_SS_21331_10483 | Others | Glicosil-transferase | Cell wall               | glucosyltransferase                                                                                                                                                                                                                       | unknown [Zea mays]                                                                                                                                                                                                                                       |  | down (-2.7200,-4.9800) |                        | 0 | 1 | 0 | 1 |
| SCJLST1020H07.g | GS1_SS_01085_16738 | Others | Glycosyltransferase  | Cell wall               | Xyloglucan endotransglycosylase/hydrolase (XTH)                                                                                                                                                                                           | unknown [Zea mays]                                                                                                                                                                                                                                       |  | down (-2.3100,-5.4300) | down (-3.8200,-5.9600) | 0 | 2 | 0 | 2 |
| SCRUFL3067H08.g | GS1_SS_22685_20741 | Others | glycosyltransferases | Secondary metabolism    | glucosyltransferase-9                                                                                                                                                                                                                     | unknown [Zea mays]                                                                                                                                                                                                                                       |  |                        | down (-6.1200,-7.0200) | 0 | 1 | 0 | 1 |
| SCCCLR2004G11.g | GS1_SS_02400_12430 | Others | hydrolase            |                         | Putative lipase ROG1; Revertant of glycogen synthase kinase mutation protein 1                                                                                                                                                            | unknown [Zea mays]                                                                                                                                                                                                                                       |  |                        | up (1.9200,2.7100)     | 1 | 0 | 0 | 1 |
| SCRURT3063D02.g | GS1_SS_25008_05086 | Others | hydrolase            |                         |                                                                                                                                                                                                                                           | hypothetical protein Osl_017815 [Oryza sativa (japonica cultivar-group)]                                                                                                                                                                                 |  |                        | down (-3.2500,-3.8600) | 0 | 1 | 0 | 1 |
| SCACLR1057A09.g | GS1_SS_21649_10221 | Others | hydrolase            |                         | Putative copper-transporting ATPase 3                                                                                                                                                                                                     | putative copper-exporting ATPase [Sorghum bicolor]                                                                                                                                                                                                       |  |                        | up (2.2600,5.1600)     | 1 | 0 | 0 | 1 |
| SCCCSD1003E06.g | GS1_SS_25375_14237 | Others | inhibitor            | Pathogenicity           | Protease inhibitor                                                                                                                                                                                                                        | thaumatin                                                                                                                                                                                                                                                |  |                        | up (7.4900,4.1700)     | 1 | 0 | 0 | 1 |
| SCCCSD2001E05.g | GS1_SS_25669_19204 | Others | inhibitor            | Pathogenicity           | protease inhibitor                                                                                                                                                                                                                        | Pathogenesis-related protein 5/thaumatin related                                                                                                                                                                                                         |  |                        | up (3.1600,5.9900)     | 1 | 0 | 0 | 1 |
| SCJLLR1102C07.g | GS1_SS_10657_10822 | Others | ion binding          |                         | PsbP-like protein 2, chloroplastic; Probable FKBP-type peptidyl-prolyl cis-trans isomerase 2, chloroplast precursor (PPLase) (Rotamase)                                                                                                   | hypothetical protein Osl_009954 [Oryza sativa (japonica cultivar-group)]                                                                                                                                                                                 |  |                        | down (-4.2700,-6.5100) | 0 | 1 | 0 | 1 |
| SCEQLB1064H09.g | GS1_SS_09110_10359 | Others | isomerase            |                         |                                                                                                                                                                                                                                           | hypothetical protein Osl_029064 [Oryza sativa (indica cultivar-group)]                                                                                                                                                                                   |  |                        | down (-3.2700,-7.3300) | 0 | 2 | 0 | 2 |
| SCJLST1021E11.g | GS1_SS_02949_13718 | Others | isomerase            | Transcription Factor    | AP2/EREBP                                                                                                                                                                                                                                 | Tiny                                                                                                                                                                                                                                                     |  |                        | down (-4.1800,-4.6100) | 0 | 1 | 0 | 1 |
| SCMCSB1115D10.g | GS1_AS_24110_17334 | Others | kinase/phosphatase   | Transporters            | ABC1 family (ABC1)                                                                                                                                                                                                                        | Os09g0250700 [Oryza sativa (japonica cultivar-group)] ABC1 family protein-like [Oryza sativa Japonica Group] Os09g0250700 [Oryza sativa (japonica cultivar-group)]                                                                                       |  |                        | up (3.6200,3.3200)     | 1 | 0 | 0 | 1 |
| SCEPSD2008F06.g | GS1_SS_25775_17841 | Others | kinase/phosphatase   | Carbohydrate metabolism | Carbon fixation                                                                                                                                                                                                                           | Phosphoribulokinase EC 2.7.1.19                                                                                                                                                                                                                          |  |                        | down (-3.2400,-4.3200) | 0 | 2 | 0 | 2 |
| SCCCLR1C01D07.g | GS1_SS_00808_05136 | Others | kinase/phosphatase   |                         | Soluble inorganic pyrophosphatase (Pyrophosphate phosphohydrolase) (PPase) Soluble inorganic pyrophosphatase (Pyrophosphate phosphohydrolase) (PPase)                                                                                     | Os02g0704900 [Oryza sativa (japonica cultivar-group)] Soluble inorganic pyrophosphatase (Pyrophosphate phosphohydrolase) (PPase) Soluble inorganic pyrophosphatase (Pyrophosphate phosphohydrolase) (PPase) inorganic pyrophosphatase [Oryza sativa Japo |  |                        | down (-2.8700,-4.2300) | 0 | 1 | 0 | 1 |
| SCQGRZ3010C10.g | GS1_SS_08191_08901 | Others | kinase/phosphatase   |                         | Protein phosphatase PTC7 homolog                                                                                                                                                                                                          | unknown [Zea mays]                                                                                                                                                                                                                                       |  |                        | down (-2.5400,-2.5500) | 0 | 2 | 0 | 2 |
| SCQSHR1024G09.g | GS1_SS_08308_10681 | Others | kinase/phosphatase   | Receptors               | Receptor Ser/Thr kinase                                                                                                                                                                                                                   | cane S-receptor-43                                                                                                                                                                                                                                       |  |                        | down (-3.2000,-5.9000) | 0 | 1 | 0 | 1 |
| SCJLRT1017C01.g | GS1_SS_12493_03509 | Others | kinase/phosphatase   |                         | CTD small phosphatase-like protein 2; CTDSP-like 2                                                                                                                                                                                        | hypothetical protein Osl_019593 [Oryza sativa (indica cultivar-group)]                                                                                                                                                                                   |  |                        | up (2.6600,2.7500)     | 1 | 0 | 0 | 1 |
| SCMCSD2061D05.g | GS1_SS_25565_17459 | Others | kinase/phosphatase   | Protein kinase          | undefined unclassified                                                                                                                                                                                                                    | caneUPK-46 (CBL-interacting protein kinase - CIPK)                                                                                                                                                                                                       |  |                        | up (3.2400,7.4800)     | 1 | 0 | 0 | 1 |
| SCMCST1051F08.g | GS1_SS_15048_17158 | Others | kinase/phosphatase   | Protein phosphatase     |                                                                                                                                                                                                                                           | Tyrosine Specific Protein Phosphatases (PTP)                                                                                                                                                                                                             |  |                        | down (-2.6800,-4.3100) | 0 | 1 | 0 | 1 |
| SCCCLB1001E04.g | GS1_SS_03025_20848 | Others | kinase/phosphatase   | Carbohydrate metabolism | vegetative storage protein (acid phosphatase)                                                                                                                                                                                             | unknown [Zea mays]                                                                                                                                                                                                                                       |  |                        | down (-3.1400,-5.8600) | 0 | 2 | 0 | 2 |

|                 |                    |        |                                                                                                                  |                         |                                                                                                                                                                                                                                         |                                                                                                                                                                    |  |                        |                        |   |   |   |   |
|-----------------|--------------------|--------|------------------------------------------------------------------------------------------------------------------|-------------------------|-----------------------------------------------------------------------------------------------------------------------------------------------------------------------------------------------------------------------------------------|--------------------------------------------------------------------------------------------------------------------------------------------------------------------|--|------------------------|------------------------|---|---|---|---|
| SCMCSB1115D10.g | GS1_SS_24110_17333 | Others | kinase/phosphatase                                                                                               | Transporters            | ABC1 family (ABC1)                                                                                                                                                                                                                      | Os09g0250700 [Oryza sativa (japonica cultivar-group)] ABC1 family protein-like [Oryza sativa Japonica Group] Os09g0250700 [Oryza sativa (japonica cultivar-group)] |  | up (2.2000,3.0300)     |                        | 1 | 0 | 0 | 1 |
| SCJLHR1028E06.g | GS1_SS_08176_19578 | Others | methyltransferase                                                                                                | Hormone biosynthesis    | Jasmonate                                                                                                                                                                                                                               | carboxyl methyltransferase                                                                                                                                         |  | up (3.1900,4.5500)     | up (4.9100,4.9200)     | 2 | 0 | 0 | 2 |
| SCAGSB1089E04.g | GS1_AS_21758_03851 | Others | NAD dependent epimerase/dehydratase family putative dihydroflavonol-4-reductase or Cinnamoyl-coA reductase (CCR) | Cell wall               | Dihydroflavonol-4-reductase; DFR; Dihydrokaempferol 4-reductase                                                                                                                                                                         | unknown [Zea mays]                                                                                                                                                 |  |                        | down (-2.8000,-3.6700) | 0 | 1 | 0 | 1 |
| SCAGSB1089E04.g | GS1_SS_21758_03852 | Others | NAD dependent epimerase/dehydratase family putative dihydroflavonol-4-reductase or Cinnamoyl-coA reductase (CCR) | Cell wall               | Dihydroflavonol-4-reductase; DFR; Dihydrokaempferol 4-reductase                                                                                                                                                                         | unknown [Zea mays]                                                                                                                                                 |  |                        | down (-3.3500,-4.0400) | 0 | 1 | 0 | 1 |
| SCCCAM1C01F03.g | GS1_SS_01828_19341 | Others | O-methyltransferase (OMT)                                                                                        | Cell wall               | Inositol                                                                                                                                                                                                                                | inositol o-methyltransferase                                                                                                                                       |  | down (-5.2200,-5.6900) | down (-4.8000,-6.5500) | 0 | 2 | 0 | 2 |
| SCAGAM2018H09.g | GS1_SS_03687_06940 | Others | others                                                                                                           |                         | Senescence-associated protein DIN1                                                                                                                                                                                                      | unknown [Zea mays]                                                                                                                                                 |  |                        | down (-5.7800,-3.6800) | 0 | 1 | 0 | 1 |
| SCCART2C08E12.g | GS1_SS_07813_09729 | Others | others                                                                                                           |                         | UPF0497 membrane protein At4g03540                                                                                                                                                                                                      | unknown [Zea mays]                                                                                                                                                 |  |                        | up (4.6800,4.4800)     | 1 | 0 | 0 | 1 |
| SCBFSD1037G05.g | GS1_SS_25364_10919 | Others | others                                                                                                           |                         | Desiccation-related protein PCC13-62;                                                                                                                                                                                                   | unknown [Zea mays]                                                                                                                                                 |  |                        | up (8.0400,7.3100)     | 1 | 0 | 0 | 1 |
| SCCCL3004A08.b  | GS1_SS_05812_10057 | Others | others                                                                                                           |                         | Early nodulin 93; N-93                                                                                                                                                                                                                  | unknown [Zea mays]                                                                                                                                                 |  |                        | up (4.9700,4.0600)     | 1 | 0 | 0 | 1 |
| SCBFSD1034C06.g | GS1_SS_26225_05201 | Others | oxidase                                                                                                          |                         | Polyphenol oxidase, chloroplastic; PPO; Catechol oxidase;                                                                                                                                                                               | polyphenol oxidase [Triticum aestivum]                                                                                                                             |  | up (2.2700,5.5400)     | up (7.0300,6.4000)     | 2 | 0 | 0 | 2 |
| SCQGLR2025H03.g | GS1_SS_08026_15032 | Others | oxidoreductase                                                                                                   | Photosynthesis          | (Q55087) Geranylgeranyl hydrogenase                                                                                                                                                                                                     | unknown [Zea mays]                                                                                                                                                 |  |                        | down (-4.1900,-5.3100) | 0 | 1 | 0 | 1 |
| SCEQRT1033E11.g | GS1_SS_00870_06146 | Others | oxygenase                                                                                                        |                         | 2-nitropropane dioxygenase; 2-NPD; Nitroalkane oxidase;                                                                                                                                                                                 | hypothetical protein LOC100191301 [Zea mays] unknown [Zea mays]                                                                                                    |  | up (2.4400,2.8600)     |                        | 1 | 0 | 0 | 1 |
| SCEPSD1005H05.g | GS1_SS_26217_01541 | Others | oxygenase                                                                                                        |                         | Hyoscyamine 6-dioxygenase; Hyoscyamine 6-beta-hydroxylase                                                                                                                                                                               | ids2 [Hordeum vulgare subsp. vulgare]                                                                                                                              |  |                        | down (-4.2300,-5.4500) | 0 | 1 | 0 | 1 |
| SCJFRT1010D11.g | GS1_SS_12203_08593 | Others | oxygenase                                                                                                        |                         |                                                                                                                                                                                                                                         | unknown [Zea mays]                                                                                                                                                 |  |                        | up (3.2200,4.0200)     | 1 | 0 | 0 | 1 |
| SCQGR10344B11.g | GS1_SS_26250_03614 | Others | peptidase                                                                                                        |                         | Serine carboxypeptidase-like 18; Aspartic proteinase-like protein 2;                                                                                                                                                                    | unknown [Zea mays]                                                                                                                                                 |  | up (2.5400,3.6700)     |                        | 1 | 0 | 0 | 1 |
| SCQGLV1018H09.g | GS1_SS_26173_02086 | Others | protease                                                                                                         |                         |                                                                                                                                                                                                                                         | unknown [Zea mays]                                                                                                                                                 |  |                        | up (3.2800,3.4300)     | 1 | 0 | 0 | 1 |
| SCEPAM1051H04.g | GS1_SS_02069_13254 | Others | protein-protein interaction                                                                                      |                         | Thylakoid membrane phosphoprotein 14 kDa, chloroplastic;                                                                                                                                                                                | Os01g0761000 [Oryza sativa (japonica cultivar-group)] Os01g0761000 [Oryza sativa (japonica cultivar-group)]                                                        |  |                        | down (-2.7300,-3.4900) | 0 | 1 | 0 | 1 |
| SCQSR2034D09.g  | GS1_SS_06805_06778 | Others | Redutase                                                                                                         |                         | Short-chain dehydrogenase/reductase 2; AtSDR2                                                                                                                                                                                           | unknown [Zea mays] unknown [Zea mays]                                                                                                                              |  |                        | up (3.9600,3.9600)     | 1 | 0 | 0 | 1 |
| SCJFHR1C01B11.g | GS1_SS_07914_11991 | Others | Ribosomal protein                                                                                                |                         | 30S ribosomal protein S5, chloroplastic;                                                                                                                                                                                                | unknown [Zea mays]                                                                                                                                                 |  | down (-2.7900,-2.7700) | down (-3.3300,-3.1700) | 0 | 2 | 0 | 2 |
| SCQSLR1018D09.g | GS1_SS_03133_00292 | Others | serine and sphingolipid biosynthesis                                                                             |                         | Probable serine incorporator                                                                                                                                                                                                            | unknown [Zea mays]                                                                                                                                                 |  |                        | down (-3.6200,-2.8100) | 0 | 1 | 0 | 1 |
| SCCSD2003H04.g  | GS1_SS_25824_10702 | Others | storage protein                                                                                                  | Library-specific        | By domain                                                                                                                                                                                                                               | Tryp_alpha_amyl                                                                                                                                                    |  | down (-3.6700,-3.1700) |                        | 0 | 1 | 0 | 1 |
| SCCCLB1025A11.g | GS1_SS_03575_06174 | Others | Structural protein                                                                                               |                         | Remorin; DNA-binding protein                                                                                                                                                                                                            | hypothetical protein LOC100191495 [Zea mays] unknown [Zea mays]                                                                                                    |  |                        | down (-4.8300,-4.6900) | 0 | 1 | 0 | 1 |
| SCEPRZ3047C10.g | GS1_SS_15387_20175 | Others | synthase                                                                                                         | Carbohydrate metabolism | Photosynthesis                                                                                                                                                                                                                          | ATP synthase delta chain (atp-delta-thylakoid ATPase)                                                                                                              |  |                        | down (-3.8600,-4.1000) | 0 | 1 | 0 | 1 |
| SCQGL4071E04.g  | GS1_SS_19281_20818 | Others | synthase                                                                                                         | Carbohydrate metabolism | N metabolism                                                                                                                                                                                                                            | glutamine synthetase                                                                                                                                               |  |                        | down (-4.0700,-7.3100) | 0 | 1 | 0 | 1 |
| SCCFL6002C02.g  | GS1_SS_22161_12137 | Others | synthase                                                                                                         |                         | phosphoadenosine 5-phosphosulfate synthetase 2; PAPS synthetase 2; PAPSS 2; Sulfurylase kinase 2; SK 2; SK2; Includes: Sulfate adenyltransferase; Sulfate adenylate transferase; SAT; ATP-sulfurylase; Includes: Adenylyl-sulfate kinas | unknown [Zea mays]                                                                                                                                                 |  | down (-2.1600,-2.7500) | down (-3.1600,-4.3900) | 0 | 2 | 0 | 2 |

|                 |                    |        |                                     |                      |                                                                                                                                                                                                               |                                                                                                                                                                                                                                                            |  |                        |                        |   |   |   |   |
|-----------------|--------------------|--------|-------------------------------------|----------------------|---------------------------------------------------------------------------------------------------------------------------------------------------------------------------------------------------------------|------------------------------------------------------------------------------------------------------------------------------------------------------------------------------------------------------------------------------------------------------------|--|------------------------|------------------------|---|---|---|---|
| SCCCAM1C09G11.g | GS1_SS_22185_09919 | Others | transcription factor                |                      | Homeobox-leucine zipper protein HOX29; Homeodomain transcription factor HOX29; HD-ZIP protein HOX29; OsHox29                                                                                                  | TPA: TPA_inf: class III HD-Zip III protein HB8 [Zea mays]                                                                                                                                                                                                  |  | up (4.3400,3.1100)     |                        | 1 | 0 | 0 | 1 |
| SCQSAD1056E03.b | GS1_SS_00803_18820 | Others | Transferase family                  | Secondary metabolism | hydroxycinnamoyl CoA quinate transferase                                                                                                                                                                      | unknown [Zea mays]                                                                                                                                                                                                                                         |  | up (2.5800,4.2700)     | up (3.5000,4.9200)     | 2 | 0 | 0 | 2 |
| SCBFSD2037A07.g | GS1_SS_25527_20012 | Others | Transferase family                  | Photosynthesis       | (P31171) Prenyl transferase (EC 2.5.1.-)                                                                                                                                                                      | Os05g0582300 [Oryza sativa (japonica cultivar-group)] putative polyprenyl diphosphate synthase [Oryza sativa (japonica cultivar-group)] putative polyprenyl diphosphate synthase [Oryza sativa (japonica cultivar-group)] Os05g0582300 [Oryza sativa (japo |  |                        | down (-4.5800,-5.0600) | 0 | 1 | 0 | 1 |
| SCSBHR1052F05.g | GS1_SS_08432_01884 | Others | Transferase family proteinCell wall |                      | Uncharacterized acetyltransferase At3g50280                                                                                                                                                                   | unknown [Zea mays]                                                                                                                                                                                                                                         |  |                        | down (-4.1400,-4.3700) | 0 | 1 | 0 | 1 |
| SCVPRZ2044C07.g | GS1_SS_15182_02683 | Others | Transporters                        |                      | Putative copper-transporting ATPase 3                                                                                                                                                                         | unknown [Zea mays]                                                                                                                                                                                                                                         |  |                        | up (4.3400,4.7000)     | 1 | 0 | 0 | 1 |
| SCQSAD1055C01.g | GS1_SS_24242_09754 | Others | ubiquitination                      |                      | Probable ubiquitin carrier protein E2 25                                                                                                                                                                      | hypothetical protein LOC100194284 [Zea mays]<br>unknown [Zea mays]                                                                                                                                                                                         |  | up (2.3500,3.9500)     | up (4.0700,3.7800)     | 2 | 0 | 0 | 2 |
| SCOGRT1041D10.g | GS1_SS_31422_20960 | Others | Uncharacterized                     | Protein metabolism   | ClpC ATPase                                                                                                                                                                                                   | ATP-dependent Clp protease ATP-binding subunit precursor [Oryza sativa (indica cultivar-group)]                                                                                                                                                            |  |                        | up (5.0500,5.0500)     | 1 | 0 | 0 | 1 |
| SCCCRZ1003C02.g | GS1_SS_11060_08972 | Others | Uncharacterized                     |                      |                                                                                                                                                                                                               | unknown [Zea mays]                                                                                                                                                                                                                                         |  | down (-1.9800,-3.0100) |                        | 0 | 1 | 0 | 1 |
| SCRFLR1012G08.g | GS1_SS_10963_08117 | Others | uncharacterized                     |                      | Pentatricopeptide repeat-containing protein At1g31920                                                                                                                                                         | hypothetical protein OsJ_007760 [Oryza sativa (japonica cultivar-group)]                                                                                                                                                                                   |  |                        | down (-6.2400,-7.5900) | 0 | 1 | 0 | 1 |
| SCRUFL1114B10.b | GS1_SS_23953_10139 | Others | uncharacterized                     |                      | Uncharacterized protein ycf39; ORF319                                                                                                                                                                         | unknown [Zea mays]                                                                                                                                                                                                                                         |  |                        | down (-3.6700,-5.9800) | 0 | 1 | 0 | 1 |
| SCOGRT1041G07.g | GS1_SS_12676_06000 | Others | Uncharacterized                     |                      | F-box/Kelch-repeat protein At2g02870                                                                                                                                                                          | hypothetical protein OsJ_033090 [Oryza sativa (japonica cultivar-group)]                                                                                                                                                                                   |  |                        | up (3.6400,4.9500)     | 1 | 0 | 0 | 1 |
| SCRFLR1012G08.g | GS1_AS_10963_08118 | Others | uncharacterized                     |                      | Pentatricopeptide repeat-containing protein At1g31920                                                                                                                                                         | hypothetical protein OsJ_007760 [Oryza sativa (japonica cultivar-group)]                                                                                                                                                                                   |  |                        | down (-4.9200,-5.0500) | 0 | 1 | 0 | 1 |
| SCCCLR1066D07.g | GS1_SS_10164_00356 | Others | Uncharacterized                     |                      |                                                                                                                                                                                                               | unknown [Zea mays]                                                                                                                                                                                                                                         |  |                        | down (-2.9400,-5.8500) | 0 | 1 | 0 | 1 |
| SCRUFL1016D08.g | GS1_SS_22085_02163 | Others | Uncharacterized                     |                      | Uncharacterized protein At4g01050                                                                                                                                                                             | unknown [Zea mays]                                                                                                                                                                                                                                         |  | down (-2.0500,-2.8900) | down (-3.3900,-3.6400) | 0 | 2 | 0 | 2 |
| SCJFAM1065H10.g | GS1_SS_02355_01484 | Others | uncharacterized                     |                      | Protein brittle-1, chloroplastic/amyloplastic;                                                                                                                                                                | Os08g0520000 [Oryza sativa (japonica cultivar-group)] putative mitochondrial energy transfer protein [Oryza sativa Japonica Group] putative mitochondrial energy transfer protein [Oryza sativa Japonica Group] Os08g0520000 [Oryza sativa (japonica culti |  |                        | up (3.6700,3.6200)     | 1 | 0 | 0 | 1 |
| SCRFLR1055G04.g | GS1_SS_03206_04746 | Others | zinc-binding protein                |                      | E3 ubiquitin-protein ligase CHFR; Checkpoint with forkhead and RING finger domains protein                                                                                                                    | Os11g0175500 [Oryza sativa (japonica cultivar-group)] At1g47570 [Oryza sativa (japonica cultivar-group)] Zinc finger, C3HC4 type family protein, expressed [Oryza sativa (japonica cultivar-group)] Os11g0175500 [Oryza sativa (japonica cultivar-group)]  |  | up (2.6500,2.7800)     | up (4.6800,5.2900)     | 2 | 0 | 0 | 2 |
| SCEPLR1051B04.g | GS1_SS_13317_12515 | Others |                                     | Cell wall            | Fasciclin-like arabinogalactan protein                                                                                                                                                                        | unknown [Zea mays]                                                                                                                                                                                                                                         |  | down (-2.3100,-4.1700) |                        | 0 | 1 | 0 | 1 |
| SCRFLB1056D05.g | GS1_AS_24218_01518 | Others |                                     |                      | E3 ubiquitin-protein ligase MARCH8; Membrane-associated RING finger protein 8; Membrane-associated RING-CH protein VIII; MARCH-VIII; RING finger protein 178; Cellular modulator of immune recognition; c-MIR | unknown [Zea mays]                                                                                                                                                                                                                                         |  | up (6.9300,2.7900)     | up (3.7300,6.2000)     | 2 | 0 | 0 | 2 |
| SCCCST1003D04.g | GS1_SS_04384_10182 | Others |                                     | Stress               | drought and cold response                                                                                                                                                                                     | early-responsive to dehydration stress protein (erd3-like)                                                                                                                                                                                                 |  |                        | up (3.0500,3.2100)     | 1 | 0 | 0 | 1 |

|                 |                    |                           |                                                  |                         |                                                                                                                                                                                                                                         |                                                                                                                                                                                                                                                             |                        |                        |   |   |   |   |
|-----------------|--------------------|---------------------------|--------------------------------------------------|-------------------------|-----------------------------------------------------------------------------------------------------------------------------------------------------------------------------------------------------------------------------------------|-------------------------------------------------------------------------------------------------------------------------------------------------------------------------------------------------------------------------------------------------------------|------------------------|------------------------|---|---|---|---|
| SCCCRZ1004G06.g | GS1_SS_14493_11369 | Others                    |                                                  |                         | Probable protein arginine N-methyltransferase 4.2                                                                                                                                                                                       | Os06g0142800 [Oryza sativa (japonica cultivar-group)] Probable protein arginine N-methyltransferase 4.2 protein arginine N-methyltransferase protein-like [Oryza sativa Japonica Group] Os06g0142800 [Oryza sativa (japonica cultivar-group)] hypotheticala | down (-2.9300,-4.2800) |                        | 0 | 1 | 0 | 1 |
| SCRLSB1044E01.g | GS1_SS_21526_15823 | Others                    |                                                  | Nucleic acid metabolism | Nucleotide metabolism                                                                                                                                                                                                                   | AAA-type ATPase family protein                                                                                                                                                                                                                              | up (3.3300,3.0400)     | up (2.7400,4.0600)     | 2 | 0 | 0 | 2 |
| SCOSLR1089D04.g | GS1_SS_07456_16851 | Others                    |                                                  | Carbohydrate metabolism |                                                                                                                                                                                                                                         | Isocitrate dehydrogenase EC 1.1.1.42                                                                                                                                                                                                                        |                        | down (-6.6900,-5.8300) | 0 | 1 | 0 | 1 |
| SCEZLB1008G11.g | GS1_SS_17362_08695 | Others                    |                                                  |                         | Protein IQ-DOMAIN 31                                                                                                                                                                                                                    | unknown [Zea mays]                                                                                                                                                                                                                                          | down (-3.8900,-4.3800) | down (-4.7000,-5.8000) | 0 | 2 | 0 | 2 |
| SCCCLB1C06D11.g | GS1_SS_04112_13280 | Others                    |                                                  |                         | FK506-binding protein 39 kDa (Peptidyl-prolyl cis-trans isomerase) (PPIase) (Rotamase)                                                                                                                                                  | unknown [Zea mays]                                                                                                                                                                                                                                          | down (-2.8100,-3.4800) |                        | 0 | 1 | 0 | 1 |
| SCEZLB1013B06.g | GS1_SS_17150_17496 | Others                    |                                                  | Nitrogen metabolism     | Myosin heavy chain                                                                                                                                                                                                                      | With LRR domain                                                                                                                                                                                                                                             | down (-2.7900,-4.4300) |                        | 0 | 1 | 0 | 1 |
| SCEZRZ1012E01.g | GS1_SS_23177_13976 | Others                    |                                                  |                         | UPF0557 protein C10orf119 homolog                                                                                                                                                                                                       | Os01g0166800 [Oryza sativa (japonica cultivar-group)] unknown protein [Oryza sativa Japonica Group] Os01g0166800 [Oryza sativa (japonica cultivar-group)]                                                                                                   |                        | down (-3.6000,-4.6700) | 0 | 1 | 0 | 1 |
| SCAGLR1021F10.g | GS1_SS_07364_07335 | Others                    |                                                  |                         |                                                                                                                                                                                                                                         | unknown [Zea mays]                                                                                                                                                                                                                                          | down (-3.6900,-5.5200) | down (-5.9800,-4.8300) | 0 | 2 | 0 | 2 |
| SCAGLR2011E12.g | GS1_SS_11370_11622 | Others                    |                                                  |                         | Uncharacterized protein At2g39795, mitochondrial precursor                                                                                                                                                                              | unknown [Zea mays]                                                                                                                                                                                                                                          | down (-1.5000,-1.2100) | down (-3.6100,-5.0100) | 0 | 2 | 0 | 2 |
| SCACLR1128D05.g | GS1_SS_09754_10442 | Others                    |                                                  |                         |                                                                                                                                                                                                                                         | unknown [Zea mays]                                                                                                                                                                                                                                          |                        | down (-5.1400,-3.9100) | 0 | 1 | 0 | 1 |
| SCRURT2013H02.g | GS1_SS_13840_03777 | Others                    |                                                  |                         | UPF0301 protein CT0663                                                                                                                                                                                                                  | unknown [Zea mays]                                                                                                                                                                                                                                          |                        | down (-2.7800,-4.7100) | 0 | 1 | 0 | 1 |
| SCSBFL1039F08.g | GS1_SS_20403_19091 | Others                    |                                                  | Transcription Factor    | NAM (no apical meristem) Oleosin Zm-1 (Oleosin 16 kDa) (Lipid body-associated major protein) (Lipid body-associated protein L3)                                                                                                         | YZ1 (CBS domain-containing protein)                                                                                                                                                                                                                         | up (7.2400,4.5800)     | up (3.9900,5.2300)     | 2 | 0 | 0 | 2 |
| SCCCL3001C02.b  | GS1_SS_05720_06578 | Others                    |                                                  |                         |                                                                                                                                                                                                                                         | unknown [Zea mays] unknown [Zea mays] unknown [Zea mays]                                                                                                                                                                                                    | up (6.5700,3.2000)     |                        | 1 | 0 | 0 | 1 |
| SCBGSB1025F02.g | GS1_SS_24192_03990 | Others                    |                                                  | Cell wall               | beta-1,3-glucanase Glycosyl hydrolases family 17                                                                                                                                                                                        | unknown [Zea mays]                                                                                                                                                                                                                                          | down (-4.4300,-5.1200) | down (-4.8800,-5.0100) | 0 | 2 | 0 | 2 |
| SCCCL5004D07.g  | GS1_SS_24563_04818 | Others                    |                                                  |                         |                                                                                                                                                                                                                                         | unknown [Zea mays]                                                                                                                                                                                                                                          |                        | down (-5.8200,-5.2100) | 0 | 1 | 0 | 1 |
| SCEQAM1044G07.g | GS1_SS_24070_09926 | Others                    |                                                  |                         | Pentatricopeptide repeat-containing protein At1g74750                                                                                                                                                                                   | hypothetical protein Osl_027103 [Oryza sativa (indica cultivar-group)]                                                                                                                                                                                      | down (-2.1900,-5.0200) |                        | 0 | 1 | 0 | 1 |
| SCAGAM2126G09.g | GS1_SS_20067_01031 | Oxidative phosphorylation | dehydrogenase                                    |                         |                                                                                                                                                                                                                                         | unknown [Zea mays]                                                                                                                                                                                                                                          | down (-2.4000,-3.8300) | down (-4.7300,-5.8700) | 0 | 2 | 0 | 2 |
| SCRLFL3007A08.g | GS1_SS_22596_08519 | Oxidative phosphorylation | dehydrogenase                                    |                         | NAD(P)H-quinone oxidoreductase subunit L; NAD(P)H dehydrogenase I subunit L; NDH-1 subunit L; NDH-L                                                                                                                                     | unknown [Zea mays]                                                                                                                                                                                                                                          |                        | down (-3.6600,-5.5800) | 0 | 1 | 0 | 1 |
| SCAGLR2018C03.g | GS1_SS_08201_08606 | Oxidative phosphorylation | others                                           |                         | Blue copper protein;                                                                                                                                                                                                                    | unknown [Zea mays]                                                                                                                                                                                                                                          | down (-2.3900,-1.6400) | down (-2.7300,-3.6900) | 0 | 2 | 0 | 2 |
| SCBFSD1037F06.g | GS1_SS_25361_09160 | Oxidative phosphorylation | others                                           |                         |                                                                                                                                                                                                                                         | unknown [Zea mays]                                                                                                                                                                                                                                          |                        | down (-4.1000,-5.2900) | 0 | 1 | 0 | 1 |
| SCEPSD2005D11.g | GS1_SS_25416_00588 | Oxidative phosphorylation | oxidoreductase                                   |                         | NAD(P)H-quinone oxidoreductase subunit M, chloroplastic; NAD(P)H dehydrogenase I subunit M; NDH-1 subunit M; NDH-M; NAD(P)H-quinone oxidoreductase subunit M, chloroplastic; NAD(P)H dehydrogenase I subunit M; NDH-1 subunit M; NDH-M; | unknown [Zea mays]                                                                                                                                                                                                                                          |                        | down (-3.6100,-5.1700) | 0 | 1 | 0 | 1 |
| SCSGAD1009E08.g | GS1_SS_01426_21879 | Oxidative phosphorylation | synthase                                         | Carbohydrate metabolism | Photosynthesis                                                                                                                                                                                                                          | ATP synthase delta chain (atp-delta-thylakoid ATPase)                                                                                                                                                                                                       |                        | down (-2.7400,-5.5100) | 0 | 1 | 0 | 1 |
| SCSGAD1009E08.b | GS1_SS_01448_08558 | Oxidative phosphorylation | synthase                                         |                         | ATP synthase delta chain, chloroplastic; F-ATPase delta chain; H(+)-transporting ATP synthase [Sorghum bicolor]                                                                                                                         |                                                                                                                                                                                                                                                             |                        | down (-3.7000,-6.1000) | 0 | 1 | 0 | 1 |
| SCJLRT2051G07.g | GS1_SS_25693_18364 | Pathogen Resistance       | antimicrobial                                    | Pathogenicity           | Protease inhibitors                                                                                                                                                                                                                     | Thaumatococcus                                                                                                                                                                                                                                              | up (2.5400,4.6200)     | up (6.8900,4.5800)     | 2 | 0 | 0 | 2 |
| SCVPLR1028H01.g | GS1_SS_08400_14365 | Pathogen Resistance       | hydrolase                                        | Pathogenicity           | Protease inhibitor                                                                                                                                                                                                                      | thaumatin                                                                                                                                                                                                                                                   | up (5.6000,4.4900)     |                        | 1 | 0 | 0 | 1 |
| SCCST1004F07.g  | GS1_SS_17517_11707 | Pathogen Resistance       | induced by biotic and abiotic stress and hormone | Cell wall               | chitinase                                                                                                                                                                                                                               | hypothetical protein Osl_028911 [Oryza sativa (indica cultivar-group)]                                                                                                                                                                                      | down (-2.0000,-4.1100) |                        | 0 | 1 | 0 | 1 |
| SCCCL3003E07.b  | GS1_SS_06601_18767 | Pathogen Resistance       | induced by biotic and abiotic stress and hormone | Cell wall               | chitinase                                                                                                                                                                                                                               | chitinase B [Saccharum officinarum]                                                                                                                                                                                                                         | up (2.5400,4.7200)     | up (7.0700,7.8300)     | 2 | 0 | 0 | 2 |

|                 |                    |                                      |                                                        |                         |                                                                                                     |                                                                                                                                                                                                                                                            |  |                        |                        |   |   |   |   |
|-----------------|--------------------|--------------------------------------|--------------------------------------------------------|-------------------------|-----------------------------------------------------------------------------------------------------|------------------------------------------------------------------------------------------------------------------------------------------------------------------------------------------------------------------------------------------------------------|--|------------------------|------------------------|---|---|---|---|
| SCQSR1036B10.g  | GS1_SS_25808_17599 | Pathogen Resistance                  | induzida por stress biotico e abiotico e por hormônios | Cell wall               | chitinase                                                                                           | Chitinase EC 3.2.1.14                                                                                                                                                                                                                                      |  |                        | up (5.0500,3.5200)     | 1 | 0 | 0 | 1 |
| SCCCT3001A02.g  | GS1_SS_24414_20650 | Pathogen Resistance                  | induzida por stress biotico e abiotico e por hormônios | Cell wall               | chitinase                                                                                           | Endochitinase A precursor (Seed chitinase A)                                                                                                                                                                                                               |  |                        | up (7.7700,6.3400)     | 1 | 0 | 0 | 1 |
| SCBGR1050A08.g  | GS1_SS_25394_21770 | Pathogen Resistance                  | induzida por stress biotico e abiotico e por hormônios | Cell wall               | chitinase                                                                                           | hypothetical protein Osl_033349 [Oryza sativa (indica cultivar-group)]                                                                                                                                                                                     |  |                        | up (5.0500,4.2300)     | 1 | 0 | 0 | 1 |
| SCCCL1079G06.g  | GS1_SS_14231_14239 | Pathogen Resistance                  | kinase/phosphatase                                     | Protein kinase          | putative RLCK                                                                                       | caneRLCK-AI2                                                                                                                                                                                                                                               |  |                        | down (-2.9300,-6.0900) | 0 | 1 | 0 | 1 |
| SCCCL1024E01.g  | GS1_SS_18865_10717 | Pathogen Resistance                  | others                                                 |                         |                                                                                                     | unknown [Zea mays]                                                                                                                                                                                                                                         |  |                        | down (-3.3900,-4.7300) | 0 | 1 | 0 | 1 |
| SCRFSD2023E07.g | GS1_SS_41756_17921 | Pathogen Resistance                  | peptidase                                              | Pathogenicity           | R-genes transduction                                                                                | PR                                                                                                                                                                                                                                                         |  | up (3.5200,4.1800)     | up (4.5800,4.7600)     | 2 | 0 | 0 | 2 |
| SCEPSD1007C11.g | GS1_SS_25637_17940 | Pathogen Resistance                  | uncharacterized                                        | Pathogenicity           | R-gene transduction                                                                                 | PR                                                                                                                                                                                                                                                         |  |                        | up (6.9300,6.6400)     | 1 | 0 | 0 | 1 |
| SCVPRT2073B08.g | GS1_SS_11812_14889 | Pathogen Resistance                  | Uncharacterized                                        | Pathogenicity           | R-genes transduction                                                                                | PR                                                                                                                                                                                                                                                         |  |                        | up (7.9200,6.1400)     | 1 | 0 | 0 | 1 |
| SCUTFL3074E04.g | GS1_SS_38621_17997 | Pathogen Resistance                  | Uncharacterized                                        | Carbohydrate metabolism |                                                                                                     | beta-glucosidase aggregating factor [Sorghum bicolor]                                                                                                                                                                                                      |  |                        | down (-3.6900,-4.3300) | 0 | 1 | 0 | 1 |
| SCEQRT1024H10.g | GS1_SS_13487_20028 | Pathogen Resistance                  | uncharacterized                                        | Carbohydrate metabolism | Glyoxylate cycle                                                                                    | malate synthase                                                                                                                                                                                                                                            |  |                        | up (7.9800,7.3200)     | 1 | 0 | 0 | 1 |
| SCQSR1035D12.g  | GS1_SS_24797_18959 | Pathogen Resistance                  | uncharacterized                                        | Pathogenicity           | Protease inhibitors                                                                                 | Thaumatococin                                                                                                                                                                                                                                              |  | up (2.6000,4.3300)     | up (8.3600,6.7000)     | 2 | 0 | 0 | 2 |
| SCSFST3077H01.g | GS1_SS_25786_18600 | Photosynthesis                       | Clorofila                                              | Carbohydrate metabolism | chlorophyll a/b binding protein (CAB)                                                               | hypothetical protein LOC100191715 [Zea mays] unknown [Zea mays]                                                                                                                                                                                            |  |                        | down (-3.7800,-6.6700) | 0 | 1 | 0 | 1 |
| SCEQHR1082D05.g | GS1_SS_07606_16073 | Porphyryn and chlorophyll metabolism | chelataze                                              | Secondary metabolism    | protoporphyrin IX magnesium chelataze-like protein                                                  | hypothetical protein Osl_011049 [Oryza sativa (indica cultivar-group)]                                                                                                                                                                                     |  |                        | down (-3.5600,-4.6300) | 0 | 1 | 0 | 1 |
| SCSFCL6068B09.g | GS1_SS_24292_16622 | Porphyryn and chlorophyll metabolism | decarboxylase                                          | Secondary metabolism    | Uroporphyrinogen-III decarboxylase                                                                  | Os01g0622300 [Oryza sativa (japonica cultivar-group)] putative uroporphyrinogen decarboxylase [Oryza sativa Japonica Group] Os01g0622300 [Oryza sativa (japonica cultivar-group)]                                                                          |  | down (-2.8700,-3.0800) |                        | 0 | 1 | 0 | 1 |
| SCEQHR1080F03.g | GS1_SS_24189_12326 | Porphyryn and chlorophyll metabolism | decarboxylase                                          |                         | Uroporphyrinogen decarboxylase, chloroplast; URO-D; UPD;                                            | unknown [Zea mays]                                                                                                                                                                                                                                         |  | down (-2.4800,-3.8100) |                        | 0 | 1 | 0 | 1 |
| SCACLR2014H06.g | GS1_SS_03006_13423 | Porphyryn and chlorophyll metabolism | kinase/phosphatase                                     |                         | Probable NAD kinase 2, chloroplast;                                                                 | hypothetical protein Osl_031917 [Oryza sativa (japonica cultivar-group)]                                                                                                                                                                                   |  | up (2.0600,3.1800)     |                        | 1 | 0 | 0 | 1 |
| SCEZSB1090G04.g | GS1_SS_19469_21692 | Porphyryn and chlorophyll metabolism | ligase                                                 | Photosynthesis          | (P72772) Magnesium-chelataze subunit chID (Mg-protoporphyrin IX chelataze) (Mg-chelataze subunit D) | Os03g0811100 [Oryza sativa (japonica cultivar-group)] putative magnesium chelataze [Oryza sativa (japonica cultivar-group)] magnesium chelataze ATPase subunit D family protein, expressed [Oryza sativa (japonica cultivar-group)] Os03g0811100 [Oryza sa |  | down (-2.7400,-3.7700) | down (-3.5000,-4.8100) | 0 | 2 | 0 | 2 |
| SCACLR1057H07.g | GS1_SS_04477_20876 | Porphyryn and chlorophyll metabolism | others                                                 | Photosynthesis          | (Q94H64) Putative chelataze subunit                                                                 | unknown [Zea mays]                                                                                                                                                                                                                                         |  | down (-3.9200,-7.3600) | down (-7.6200,-8.4000) | 0 | 2 | 0 | 2 |
| SCACLR1057H07.g | GS1_AS_04477_20877 | Porphyryn and chlorophyll metabolism | others                                                 | Photosynthesis          | (Q94H64) Putative chelataze subunit                                                                 | unknown [Zea mays]                                                                                                                                                                                                                                         |  | down (-1.3200,-3.2800) |                        | 0 | 1 | 0 | 1 |
| SCACSB1118D08.g | GS1_SS_20850_18571 | Porphyryn and chlorophyll metabolism | others                                                 | Photosynthesis          | (Q7XZG7) Putative magnesium chelataze subunit chID                                                  | hypothetical protein Osl_013532 [Oryza sativa (indica cultivar-group)] hypothetical protein Osl_012501 [Oryza sativa (japonica cultivar-group)]                                                                                                            |  | down (-2.8000,-3.9700) |                        | 0 | 1 | 0 | 1 |
| SCCCL1021E12.g  | GS1_SS_16038_21347 | Porphyryn and chlorophyll metabolism | oxidase                                                | Protein metabolism      | Protoporphyrinogen IX oxidase (EC 1.3.3.4)                                                          | unknown [Zea mays]                                                                                                                                                                                                                                         |  | down (-3.4700,-4.0800) | down (-4.4100,-4.8200) | 0 | 2 | 0 | 2 |
| SCCCL1022F01.g  | GS1_SS_20645_01924 | Porphyryn and chlorophyll metabolism | Reductase                                              |                         | Carbonyl reductase 4                                                                                | unknown [Zea mays]                                                                                                                                                                                                                                         |  |                        | up (3.1200,3.5600)     | 1 | 0 | 0 | 1 |
| SCCCL4005E12.g  | GS1_SS_09119_19261 | Protein metabolism                   | chaperon                                               | Calcium metabolism      | calmodulin-binding proteins                                                                         | Chaperonin 10                                                                                                                                                                                                                                              |  | down (-3.4400,-4.9400) |                        | 0 | 1 | 0 | 1 |
| SCEQLB1068F08.g | GS1_SS_19091_11764 | Protein metabolism                   | chaperon                                               |                         | Chaperone protein dnaJ 11, chloroplast; AtJ11; AtDJC11;                                             | hypothetical protein Osl_029130 [Oryza sativa (indica cultivar-group)]                                                                                                                                                                                     |  | up (2.7000,3.6200)     |                        | 1 | 0 | 0 | 1 |
| SCCCL1070E06.g  | GS1_SS_17503_14606 | Protein metabolism                   | elongation factor                                      | Protein metabolism      | Eukaryotic translation initiation factor 5A-1/2 (eIF-5A 1/2) (eIF-4D)                               | hypothetical protein LOC100192991 [Zea mays] unknown [Zea mays]                                                                                                                                                                                            |  | down (-2.1900,-3.2800) |                        | 0 | 1 | 0 | 1 |
| SCJFRT1060E10.g | GS1_SS_12310_06740 | Protein metabolism                   | F-box                                                  |                         | F-box/Kelch-repeat protein At1g74510                                                                | hypothetical protein Osl_008102 [Oryza sativa (japonica cultivar-group)]                                                                                                                                                                                   |  |                        | up (7.1000,5.7300)     | 1 | 0 | 0 | 1 |
| SCEZLB1006D01.g | GS1_SS_09165_11095 | Protein metabolism                   | F-box                                                  |                         | F-box protein At2g26160                                                                             | unnamed protein product [Vitis vinifera]                                                                                                                                                                                                                   |  |                        | down (-4.2300,-6.5500) | 0 | 1 | 0 | 1 |



|                 |                    |                    |                         |                         |                                                                                                                                                           |                                                                                            |                        |                        |                        |   |   |   |   |
|-----------------|--------------------|--------------------|-------------------------|-------------------------|-----------------------------------------------------------------------------------------------------------------------------------------------------------|--------------------------------------------------------------------------------------------|------------------------|------------------------|------------------------|---|---|---|---|
| SCSBAD1052A06.g | GS1_SS_01122_02959 | Protein metabolism | isomerase               |                         | FKBP-type peptidyl-prolyl cis-trans isomerase 6, chloroplastic; FKBP20-2; PPIase; Rotamase;                                                               | unknown [Zea mays]                                                                         |                        | down (-3.8500,-3.5600) | down (-5.2800,-3.9700) | 0 | 2 | 0 | 2 |
| SCCCLB1002A09.g | GS1_SS_08831_18370 | Protein metabolism | others                  | Ubiquitination          | E2                                                                                                                                                        | unknown [Zea mays]                                                                         |                        | up (2.7600,3.2700)     |                        | 1 | 0 | 0 | 1 |
| SCCCTR1004E02.g | GS1_SS_18669_08783 | Protein metabolism | others                  |                         |                                                                                                                                                           | unknown [Zea mays]                                                                         |                        | up (3.8900,4.3000)     |                        | 1 | 0 | 0 | 1 |
| SCAQLR1126A09.g | GS1_SS_09611_07688 | Protein metabolism | others                  |                         | Translation initiation factor IF-3                                                                                                                        | hypothetical protein LOC100193325 [Zea mays]                                               |                        |                        | down (-3.5500,-4.8900) | 0 | 1 | 0 | 1 |
| SCCCR22C04C11.g | GS1_SS_01867_08709 | Protein metabolism | others                  |                         |                                                                                                                                                           | unknown [Zea mays]                                                                         |                        | up (3.2400,3.2000)     |                        | 1 | 0 | 0 | 1 |
| SCRFLB2060E04.g | GS1_SS_25725_08917 | Protein metabolism | oxidoreductase          |                         | Nucleoredoxin                                                                                                                                             | hypothetical protein LOC100192725 [Zea mays]                                               |                        | up (7.2400,2.9600)     | up (4.9600,5.0200)     | 2 | 0 | 0 | 2 |
| SCQSLB1049F06.g | GS1_SS_23959_20720 | Protein metabolism | peptidase               | Protein metabolism      | Subtilisin-like serine protease                                                                                                                           | hypothetical protein Osl_028433 [Oryza sativa (indica cultivar-group)]                     |                        |                        | down (-3.2100,-4.1500) | 0 | 1 | 0 | 1 |
| SCCCTR2004D09.g | GS1_SS_12619_17993 | Protein metabolism | peptidase               | Protein metabolism      | Putative serine carboxypeptidase                                                                                                                          | Serine carboxypeptidase family protein, expressed [Oryza sativa (japonica cultivar-group)] |                        |                        | down (-3.5500,-4.6600) | 0 | 1 | 0 | 1 |
| SCEZAM2033B11.g | GS1_SS_04193_03059 | Protein metabolism | peptidase               |                         | Serine carboxypeptidase-like 26; ATP-dependent Clp protease ATP-binding subunit clpA homolog CD4B, chloroplastic;                                         | unknown [Zea mays]                                                                         | down (-2.3100,-3.1500) |                        |                        | 0 | 1 | 0 | 1 |
| SCQGLR1062F08.g | GS1_AS_10809_04863 | Protein metabolism | peptidase               |                         | Aspartic proteinase nepenthesin-2; Nepenthesin-II;                                                                                                        | hypothetical protein Osl_014066 [Oryza sativa (japonica cultivar-group)]                   |                        |                        | up (3.3800,3.9200)     | 1 | 0 | 0 | 1 |
| SCRFLR2038B01.g | GS1_SS_11907_11959 | Protein metabolism | protease                |                         | subtilase family protein                                                                                                                                  | unknown [Zea mays]                                                                         |                        | up (2.8900,3.5100)     | up (2.9500,3.3500)     | 2 | 0 | 0 | 2 |
| SCJFRZ2009E12.g | GS1_SS_24924_16478 | Protein metabolism | protease                | Protein metabolism      | Eukaryotic peptide chain release factor subunit 1-1 (Eukaryotic release factor 1-1) (eRF1-1) (Omnipotent suppressor protein 1 homolog 1) (SUP1 homolog 1) | hypothetical protein Osl_030760 [Oryza sativa (indica cultivar-group)]                     |                        |                        | down (-5.1200,-6.6600) | 0 | 1 | 0 | 1 |
| SCEPRZ3129G09.g | GS1_SS_19353_07185 | Protein metabolism | release factor activity |                         | 50S ribosomal protein L24, chloroplast precursor (CL24)                                                                                                   | unknown [Zea mays]                                                                         |                        | up (3.9000,2.9100)     | up (4.2000,5.1900)     | 2 | 0 | 0 | 2 |
| SCRUHR1076E02.g | GS1_SS_08097_18431 | Protein metabolism | Ribosomal protein       | Protein metabolism      | 50S ribosomal protein L15, chloroplast precursor (CL15) (Fragment)                                                                                        | unknown [Zea mays]                                                                         |                        | down (-3.6700,-3.4400) | down (-3.9200,-3.3600) | 0 | 2 | 0 | 2 |
| SCSGHR1066A02.g | GS1_SS_03000_19495 | Protein metabolism | Ribosomal protein       | Protein metabolism      | 50S ribosomal protein L6, chloroplastic; Protein EMBRYO DEFECTIVE 2394;                                                                                   | unknown [Zea mays]                                                                         |                        | down (-3.4800,-3.9900) | down (-5.3800,-5.5300) | 0 | 2 | 0 | 2 |
| SCRFLR1034H12.g | GS1_SS_22510_03436 | Protein metabolism | ribosomal protein       |                         | 50S ribosomal protein L4, chloroplastic; CL4; R-protein L4;                                                                                               | unknown [Zea mays]                                                                         |                        |                        | down (-2.8900,-3.3600) | 0 | 1 | 0 | 1 |
| SCCCLL5001D04.g | GS1_SS_07223_04063 | Protein metabolism | RNA-binding protein     |                         | Tyrosyl-tRNA synthetase, cytoplasmic; Tyrosyl-tRNA ligase; TyrRS                                                                                          | unknown [Zea mays]                                                                         | up (2.3300,1.9100)     |                        |                        | 1 | 0 | 0 | 1 |
| SCEZLR1052E03.g | GS1_SS_10436_11125 | Redox metabolism   | electron carrier        |                         | Thioredoxin F-type 2, chloroplastic; Trx-F2;                                                                                                              | unknown [Zea mays]                                                                         |                        |                        | down (-3.8000,-3.3100) | 0 | 1 | 0 | 1 |
| SCQGST1034C05.g | GS1_SS_06748_18960 | Redox metabolism   | Multicopper oxidase     | Carbohydrate metabolism | Cell wall                                                                                                                                                 | Pectinesterase EC 3.1.1.11                                                                 |                        | down (-2.2300,-4.1100) |                        | 0 | 1 | 0 | 1 |
| SCUTST3084C11.g | GS1_SS_18949_03741 | Redox metabolism   | Multicopper oxidase     | Cell wall               | laccase-like protein                                                                                                                                      | hypothetical protein LOC100193025 [Zea mays]                                               |                        |                        | down (-4.6500,-4.8100) | 0 | 1 | 0 | 1 |
| SCQGLR2025B01.g | GS1_SS_03563_13355 | Redox metabolism   | Multicopper oxidase     | Cell wall               | laccase-like protein                                                                                                                                      | unknown [Zea mays]                                                                         |                        | down (-3.7000,-5.9400) | down (-3.4200,-6.4300) | 0 | 2 | 0 | 2 |
| SCBGLR1096C09.g | GS1_SS_12233_00222 | Redox metabolism   | others                  |                         | Peroxioredoxin Q, chloroplastic; Thioredoxin reductase;                                                                                                   | unknown [Zea mays]                                                                         |                        | down (-2.6500,-4.5200) | down (-4.3100,-5.0100) | 0 | 2 | 0 | 2 |
| SCCCLL4011A06.g | GS1_SS_07348_08693 | Redox metabolism   | oxidoreductase          |                         | Probable aldehyde oxidase 2; AO-2                                                                                                                         | aldehyde oxidase-2 [Zea mays]                                                              |                        |                        | down (-4.0300,-3.3900) | 0 | 1 | 0 | 1 |
| SCCCLR1076H02.g | GS1_SS_18560_04913 | Redox metabolism   | oxidoreductase          |                         | Probable NADP-dependent oxidoreductase P2                                                                                                                 | 2-alkenal reductase [Hordeum vulgare subsp. vulgare]                                       |                        |                        | down (-4.2000,-5.3700) | 0 | 1 | 0 | 1 |
| SCCCLL3120A03.g | GS1_SS_06792_07689 | Redox metabolism   | oxidoreductase          |                         | Probable NADP-dependent oxidoreductase P1                                                                                                                 | hypothetical protein Osl_034490 [Oryza sativa (indica cultivar-group)]                     |                        |                        | down (-6.7600,-3.9200) | 0 | 1 | 0 | 1 |
| SCQGSB1142G01.g | GS1_SS_21273_17968 | Redox metabolism   | oxidoreductase          | Stress                  | Water stress                                                                                                                                              | induced                                                                                    |                        |                        | down (-3.9900,-4.6000) | 0 | 1 | 0 | 1 |
| SCJLRT2050G12.g | GS1_SS_13486_05014 | Redox metabolism   | oxygenase               |                         | Uricase-2; Uricase II; Urate oxidase; Nodule-specific uricase                                                                                             | urate oxidase [Sorghum bicolor]                                                            |                        | up (2.0100,5.2600)     | up (6.0700,5.6500)     | 2 | 0 | 0 | 2 |
| SCCST3005E08.g  | GS1_SS_04718_20859 | Redox metabolism   | peroxidase              | Stress                  | response to oxidative stress                                                                                                                              | Peroxidase                                                                                 |                        |                        | down (-9.0600,-8.7500) | 0 | 1 | 0 | 1 |
| SCCCLL4008H04.g | GS1_SS_05420_14205 | Redox metabolism   | peroxidase              |                         | Peroxidase 56; Atperox P56; ATP33;                                                                                                                        | unknown [Zea mays]                                                                         |                        |                        | up (3.5000,3.9200)     | 1 | 0 | 0 | 1 |

|                 |                    |                  |                     |                         |                                                                                                                                                   |                                                                                                                                                                                                                                                            |  |                        |                        |   |   |   |   |
|-----------------|--------------------|------------------|---------------------|-------------------------|---------------------------------------------------------------------------------------------------------------------------------------------------|------------------------------------------------------------------------------------------------------------------------------------------------------------------------------------------------------------------------------------------------------------|--|------------------------|------------------------|---|---|---|---|
| SCEQRT1028D12.g | GS1_SS_11752_04522 | Redox metabolism | peroxidase          | Library-specific        | By domain                                                                                                                                         | Peroxidases                                                                                                                                                                                                                                                |  | down (-3.1400,-4.9800) |                        | 0 | 1 | 0 | 1 |
| SCJFSB1012D05.g | GS1_SS_16908_14285 | Redox metabolism | peroxidase          | .                       | Putative L-ascorbate peroxidase 6; ATAPx08                                                                                                        | hypothetical protein OsJ_026860 [Oryza sativa (japonica cultivar-group)]                                                                                                                                                                                   |  | down (-2.1100,-3.3800) |                        | 0 | 1 | 0 | 1 |
| SCBFLR1083H12.g | GS1_SS_17326_20059 | Redox metabolism | peroxidase          | Stress                  | response to oxidative stress                                                                                                                      | Bacterial-induced peroxidase precursor                                                                                                                                                                                                                     |  |                        | down (-3.5900,-4.6500) | 0 | 1 | 0 | 1 |
| SCCCCL3002F08.b | GS1_SS_12334_19734 | Redox metabolism | peroxidaseCell wall | Stress                  | response to oxidative stress                                                                                                                      | Peroxidase                                                                                                                                                                                                                                                 |  | down (-4.7200,-6.9400) |                        | 0 | 1 | 0 | 1 |
| SCBGHR1058E08.g | GS1_SS_07477_19258 | Redox metabolism | peroxidaseCell wall | Stress                  | response to oxidative stress                                                                                                                      | Peroxidase precursor                                                                                                                                                                                                                                       |  |                        | down (-3.9000,-6.1200) | 0 | 1 | 0 | 1 |
| SCVPLB1020D03.g | GS1_SS_07881_07151 | Redox metabolism | peroxidaseCell wall | .                       | Peroxidase 12; Atperox P12; PRXR6; ATP4a;                                                                                                         | unknown [Zea mays]                                                                                                                                                                                                                                         |  | up (2.3400,3.0800)     | up (5.0800,3.1900)     | 2 | 0 | 0 | 2 |
| SCSBSD1033E10.g | GS1_SS_25423_10062 | Redox metabolism | peroxidaseCell wall | Library-specific        | By domain                                                                                                                                         | Peroxidases                                                                                                                                                                                                                                                |  | up (6.8600,5.6300)     | up (6.0800,7.1200)     | 2 | 0 | 0 | 2 |
| SCCCAD1001C08.g | GS1_AS_00007_14860 | Redox metabolism | peroxidaseCell wall | Stress                  | peroxidase                                                                                                                                        | P7X                                                                                                                                                                                                                                                        |  |                        | down (-3.0100,-3.3500) | 0 | 1 | 0 | 1 |
| SCCCAD1001C08.g | GS1_SS_00007_14861 | Redox metabolism | peroxidaseCell wall | Stress                  | peroxidase                                                                                                                                        | P7X                                                                                                                                                                                                                                                        |  |                        | down (-3.9600,-4.0000) | 0 | 1 | 0 | 1 |
| SCEZRT2019F10.g | GS1_SS_06839_14194 | Redox metabolism | peroxidaseCell wall | .                       | Peroxidase 1;                                                                                                                                     | unknown [Zea mays]                                                                                                                                                                                                                                         |  |                        | down (-4.2400,-4.9900) | 0 | 1 | 0 | 1 |
| SCCCCL7037A10.g | GS1_SS_25248_14705 | Redox metabolism | peroxidaseCell wall | Stress                  | Water stress                                                                                                                                      | repressed                                                                                                                                                                                                                                                  |  | down (-3.1100,-3.6500) |                        | 0 | 1 | 0 | 1 |
| SCBFRT1071H10.g | GS1_SS_00190_10768 | Redox metabolism | Reductase           | .                       | Putative tropinone reductase homolog At1g07440                                                                                                    | unknown [Zea mays]                                                                                                                                                                                                                                         |  | up (2.4900,3.1500)     |                        | 1 | 0 | 0 | 1 |
| SCBGLR1118D04.g | GS1_SS_01434_11119 | Redox metabolism | synthase            | .                       | Putative nitric oxide synthase                                                                                                                    | hypothetical protein OsJ_004896 [Oryza sativa (japonica cultivar-group)]                                                                                                                                                                                   |  | down (-2.8600,-4.3300) |                        | 0 | 1 | 0 | 1 |
| SCJFRT1059B02.g | GS1_SS_12283_09183 | Redox metabolism | transferase         | .                       | Probable glutathione S-transferase GSTF1; GST-I                                                                                                   | glutathione-S-transferase 19E50 [Triticum aestivum]                                                                                                                                                                                                        |  |                        | down (-3.0700,-3.9100) | 0 | 1 | 0 | 1 |
| SCCCCL4007F05.g | GS1_SS_12928_14208 | Redox metabolism | transferase         | .                       | Probable glutathione S-transferase GSTU6; 28 kDa cold-induced protein                                                                             | unknown [Zea mays]                                                                                                                                                                                                                                         |  |                        | up (3.5900,4.0500)     | 1 | 0 | 0 | 1 |
| SCEZRZ3098F04.g | GS1_SS_24818_03826 | Redox metabolism | Transferase family  | .                       | Probable glutathione S-transferase BZ2; Protein bronze-2                                                                                          | bronze-2 protein [Zea mays]                                                                                                                                                                                                                                |  |                        | up (3.7900,4.1300)     | 1 | 0 | 0 | 1 |
| SCQSRT1034G09.g | GS1_SS_18176_12363 | Redox metabolism |                     | .                       | Probable sarcosine oxidase                                                                                                                        | unknown [Zea mays]                                                                                                                                                                                                                                         |  |                        | up (3.6900,5.3100)     | 1 | 0 | 0 | 1 |
| SCJFAM1067G04.b | GS1_SS_02449_14302 | RNA metabolism   | helicase            | .                       | Putative helicase mug81 (Meiotically up-regulated gene 81 protein)                                                                                | hypothetical protein OsJ_009528 [Oryza sativa (japonica cultivar-group)]                                                                                                                                                                                   |  | up (3.4900,3.8000)     | up (4.2700,5.1800)     | 2 | 0 | 0 | 2 |
| SCCCRZ1002D07.g | GS1_SS_14183_14981 | RNA metabolism   | hydrolase           | Protein metabolism      | putative CRS2-associated factor 1                                                                                                                 | unknown [Zea mays]                                                                                                                                                                                                                                         |  | down (-2.0900,-2.5000) |                        | 0 | 1 | 0 | 1 |
| SCJLRT1016G06.g | GS1_AS_12487_19040 | RNA metabolism   | nuclease            | Stress                  | wound-induced                                                                                                                                     | Ribonuclease                                                                                                                                                                                                                                               |  | up (2.9900,3.2200)     |                        | 1 | 0 | 0 | 1 |
| SCJLRT1016G06.g | GS1_SS_12487_19039 | RNA metabolism   | nuclease            | Stress                  | wound-induced                                                                                                                                     | Ribonuclease                                                                                                                                                                                                                                               |  | up (5.6500,3.5400)     |                        | 1 | 0 | 0 | 1 |
| SCSGRT2065E10.g | GS1_SS_07126_19446 | RNA metabolism   | nuclease            | Nucleic acid metabolism | DNA catabolism                                                                                                                                    | Histone-lysine N-methyltransferase, H3 lysine-9 specific 5 (EC 2.1.1.43) (Histone H3-K9 met                                                                                                                                                                |  | up (2.2100,3.9700)     | up (6.5800,4.6100)     | 2 | 0 | 0 | 2 |
| SCAGLR1043B12.g | GS1_SS_18184_19625 | RNA metabolism   | regulatory protein  | Nucleic acid metabolism | mRNA processing                                                                                                                                   | Putative histone H2 protein Os04g0388900 [Oryza sativa (japonica cultivar-group)]                                                                                                                                                                          |  | down (-2.4800,-4.3500) |                        | 0 | 1 | 0 | 1 |
| SCEZAM1081G05.g | GS1_SS_24478_05144 | RNA metabolism   | Ribosomal protein   | .                       | U6 snRNA-associated Sm-like protein LSM6 U6 snRNA-associated Sm-like protein LSM6                                                                 | Os04g0388900 [Oryza sativa (japonica cultivar-group)]                                                                                                                                                                                                      |  | down (-3.8300,-3.2900) |                        | 0 | 1 | 0 | 1 |
| SCCCCL5003D05.g | GS1_SS_08869_19374 | RNA metabolism   | rna binding protein | Nucleic acid metabolism | regulation of transcription, DNA-dependent                                                                                                        | Small nuclear ribonucleoprotein F (snRNP-F) (Sm protein F) (SmF)                                                                                                                                                                                           |  | down (-2.8600,-4.0500) |                        | 0 | 1 | 0 | 1 |
| SCCCLR1022A08.g | GS1_SS_07068_09635 | RNA metabolism   | rna binding protein | .                       | H/ACA ribonucleoprotein complex subunit 4; Nucleolar protein NAP57 homolog; Nopp-140-associated protein of 57 kDa homolog; AtNAP57                | Os07g0636000 [Oryza sativa (japonica cultivar-group)] putative centromere/microtubule binding protein [Oryza sativa Japonica Group] Os07g0636000 [Oryza sativa (japonica cultivar-group)] hypothetical protein OsJ_026066 [Oryza sativa (indica cultivar-g |  | down (-2.7000,-4.8800) |                        | 0 | 1 | 0 | 1 |
| SCBFLR1026B07.g | GS1_SS_24393_15654 | RNA metabolism   | rna binding protein | Nucleic acid metabolism | regulation of transcription, DNA-dependent                                                                                                        | Transcriptional co-repressor LEUNIG                                                                                                                                                                                                                        |  | down (-2.6700,-4.4800) |                        | 0 | 1 | 0 | 1 |
| SCEPLR1051G01.g | GS1_SS_14616_02256 | RNA metabolism   | rna binding protein | .                       | Glycine-rich RNA-binding protein 2, mitochondrial; AtGRP2;                                                                                        | unknown [Zea mays]                                                                                                                                                                                                                                         |  | down (-3.3000,-5.3700) |                        | 0 | 1 | 0 | 1 |
| SCBFLR1026B07.g | GS1_AS_24393_15653 | RNA metabolism   | rna binding protein | Nucleic acid metabolism | regulation of transcription, DNA-dependent                                                                                                        | Transcriptional co-repressor LEUNIG                                                                                                                                                                                                                        |  | down (-2.8300,-3.4500) |                        | 0 | 1 | 0 | 1 |
| SCEPRZ1010F12.g | GS1_SS_09748_13823 | RNA metabolism   | rna binding protein | .                       | Protein gar2                                                                                                                                      | H0714H04.9 [Oryza sativa (indica cultivar-group)]                                                                                                                                                                                                          |  | down (-2.3800,-4.5800) |                        | 0 | 1 | 0 | 1 |
| SCCCFL5096E07.g | GS1_SS_23812_05352 | RNA metabolism   | rna binding protein | .                       | Chloroplastic group IIA intron splicing facilitator CRS1, chloroplastic; Protein CHLOROPLAST RNA SPLICING 1; Chloroplastic RNA splicing factor 1; | CRM family member 3 [Zea mays] CRM family member 3 [Zea mays]                                                                                                                                                                                              |  | down (-2.0900,-5.0700) |                        | 0 | 1 | 0 | 1 |
| SCSBRZ3123G10.g | GS1_SS_22095_13084 | RNA metabolism   | RNA polymerase      | .                       | RNA-dependent RNA polymerase 1 (Protein rdp1)                                                                                                     | RNA-directed RNA polymerase 2 [Hordeum vulgare subsp. vulgare]                                                                                                                                                                                             |  |                        | down (-4.7600,-4.2600) | 0 | 1 | 0 | 1 |

|                 |                    |                           |                              |                      |                                                                                                                                                                 |                                                                                                                                                                                                                                                                     |                    |                        |                        |   |   |   |   |
|-----------------|--------------------|---------------------------|------------------------------|----------------------|-----------------------------------------------------------------------------------------------------------------------------------------------------------------|---------------------------------------------------------------------------------------------------------------------------------------------------------------------------------------------------------------------------------------------------------------------|--------------------|------------------------|------------------------|---|---|---|---|
| SCCCLR1080D05.g | GS1_SS_10282_13917 | RNA metabolism            | RNA-binding protein          |                      | UDP-N-acetylglucosamine pyrophosphorylase                                                                                                                       | hypothetical protein Osl_018784 [Oryza sativa (japonica cultivar-group)]                                                                                                                                                                                            |                    | down (-1.9900,-3.3700) |                        | 0 | 1 | 0 | 1 |
| SCCCRZ3002E05.g | GS1_SS_15205_03914 | RNA metabolism            | RNA-binding protein          |                      | Protein argonaute                                                                                                                                               | Os04g0615700 [Oryza sativa (japonica cultivar-group)]<br>OSJNBa0008M17.11 [Oryza sativa (japonica cultivar-group)]<br>Os04g0615700 [Oryza sativa (japonica cultivar-group)]                                                                                         |                    | up (1.9600,2.8400)     |                        | 1 | 0 | 0 | 1 |
| SCCCCL4009D08.g | GS1_SS_06081_19373 | RNA metabolism            | RNA-binding protein          | G protein            | beta                                                                                                                                                            | U3 small nucleolar ribonucleoprotein complex-associated protein                                                                                                                                                                                                     |                    | down (-2.3400,-4.3000) |                        | 0 | 1 | 0 | 1 |
| SCBFRZ2049F01.g | GS1_SS_14740_20275 | RNA metabolism            | RNA-binding protein          | Protein metabolism   | Plastid ribosomal protein L11                                                                                                                                   | unknown [Zea mays]                                                                                                                                                                                                                                                  |                    |                        | down (-3.1700,-3.9700) | 0 | 1 | 0 | 1 |
| SCBFRZ2017B05.g | GS1_SS_14687_04038 | RNA metabolism            | RNA-binding protein          |                      | 30S ribosomal protein S17                                                                                                                                       | unknown [Zea mays]                                                                                                                                                                                                                                                  |                    | down (-2.0200,-3.6900) |                        | 0 | 1 | 0 | 1 |
| SCJFLR1074E06.g | GS1_SS_04955_06554 | RNA metabolism            | RNA-binding protein          |                      | 31 kDa ribonucleoprotein, chloroplastic;                                                                                                                        | hypothetical protein LOC100191381 [Zea mays]<br>unknown [Zea mays]                                                                                                                                                                                                  |                    | down (-2.3000,-4.4000) |                        | 0 | 1 | 0 | 1 |
| SCCCCL3080B11.g | GS1_SS_05851_17594 | RNA metabolism            | RNA-binding protein          | Protein metabolism   | 50S ribosomal protein L28, chloroplast precursor                                                                                                                | unknown [Zea mays]                                                                                                                                                                                                                                                  |                    |                        | down (-2.9400,-4.1300) | 0 | 1 | 0 | 1 |
| SCJFRZ2015C10.g | GS1_AS_04373_20546 | RNA metabolism            | transcription factor         | Protein metabolism   | Eukaryotic translation initiation factor 4E-1 (eIF4E-1) (eIF-4E-1) (mRNA cap-binding protein)                                                                   | unknown [Zea mays]                                                                                                                                                                                                                                                  |                    | up (3.2700,4.9300)     | up (4.5100,4.3000)     | 2 | 0 | 0 | 2 |
| SCEZHR1088C09.g | GS1_AS_06761_04380 | RNA metabolism            | Uncharacterized              |                      | Nucleolar complex protein 3 homolog; NOC3 protein homolog; NOC3-like protein; Nucleolar complex-associated protein 3-like protein                               | hypothetical protein Osl_022289 [Oryza sativa (indica cultivar-group)]                                                                                                                                                                                              |                    |                        | up (4.0100,3.0500)     | 1 | 0 | 0 | 1 |
| SCJFLR2036D12.g | GS1_SS_23119_08244 | RNA metabolism            | Uncharacterized              |                      | 50S ribosomal protein L35, chloroplastic; CL35;                                                                                                                 | prp135-1 protein [Zea mays]<br>putative plastid ribosomal protein L35 [Zea mays]<br>putative plastid ribosomal protein L35 [Zea mays]<br>unknown [Zea mays]                                                                                                         |                    |                        | down (-4.0200,-5.1100) | 0 | 1 | 0 | 1 |
| SCCCCL6002B03.g | GS1_SS_06306_15240 | Senescence and cell death | oxidoreductase               | Secondary metabolism | ethylene-forming-enzyme-like dioxygenase-like protein                                                                                                           | Os06g0178700 [Oryza sativa (japonica cultivar-group)]<br>putative iron/ascorbate-dependent oxidoreductase [Oryza sativa Japonica Group]<br>Os06g0178700 [Oryza sativa (japonica cultivar-group)]<br>hypothetical protein Osl_021128 [Oryza sativa (indica cultivar- |                    |                        | up (5.3800,3.9600)     | 1 | 0 | 0 | 1 |
| SCQGLR1085F11.g | GS1_SS_11161_19643 | Signal Transduction       | dehydrin                     | Stress               | drought-induced                                                                                                                                                 | Dehydrin                                                                                                                                                                                                                                                            |                    | up (7.0500,2.7900)     | up (4.3600,5.6900)     | 2 | 0 | 0 | 2 |
| SCCCRZ2002A07.g | GS1_SS_14585_14039 | Signal Transduction       | GTPase                       | Small GTPases        | Rab                                                                                                                                                             | unknown [Zea mays]                                                                                                                                                                                                                                                  |                    |                        | down (-3.3400,-4.3900) | 0 | 1 | 0 | 1 |
| SCEPAM1024G02.g | GS1_SS_02026_18921 | Signal Transduction       | GTPase                       | Protein metabolism   | GTP-binding protein typA (Tyrosine phosphorylated protein A)                                                                                                    | hypothetical protein Osl_006092 [Oryza sativa (japonica cultivar-group)]                                                                                                                                                                                            |                    |                        | down (-3.7100,-4.4800) | 0 | 1 | 0 | 1 |
| SCAGCL6013C08.g | GS1_SS_24814_09036 | Signal Transduction       | hydrolase                    |                      | Barwin                                                                                                                                                          | unknown [Zea mays]                                                                                                                                                                                                                                                  | up (2.1600,2.5800) |                        | up (5.0600,3.2900)     | 2 | 0 | 0 | 2 |
| SCCCLR1001A03.g | GS1_SS_20259_21669 | Signal Transduction       | Internal signal transduction | Cell wall            | LRR receptor-like serine/threonine-protein kinase ERECTA                                                                                                        | caneErecta-1                                                                                                                                                                                                                                                        |                    |                        | down (-3.5300,-5.2400) | 0 | 1 | 0 | 1 |
| SCBGRT3012C05.g | GS1_SS_24459_15161 | Signal Transduction       | kinase receptor              | Receptors            | receptor Ser/Thr kinase                                                                                                                                         | caneRLK lectin domain-8                                                                                                                                                                                                                                             |                    |                        | up (3.3800,4.7700)     | 1 | 0 | 0 | 1 |
| SCCCRZ1C01H05.g | GS1_SS_20070_19627 | Signal Transduction       | kinase receptor              | Receptors            | receptor Ser/Thr kinase                                                                                                                                         | caneRLK-DVI8 (LRR)                                                                                                                                                                                                                                                  |                    | down (-2.6400,-5.1200) | down (-3.3300,-5.1100) | 0 | 2 | 0 | 2 |
| SCCCAM1002H12.g | GS1_SS_26896_08853 | Signal Transduction       | kinase receptor              | Receptors            | receptor Ser/Thr kinase                                                                                                                                         | caneLr10-1 (putative rust resistance kinase)                                                                                                                                                                                                                        |                    |                        | up (4.6700,4.9100)     | 1 | 0 | 0 | 1 |
| SCCCLR2C02A04.g | GS1_SS_08002_15649 | Signal Transduction       | kinase receptor              | Receptors            | receptor Ser/Thr kinase                                                                                                                                         | caneS receptor-19                                                                                                                                                                                                                                                   |                    |                        | down (-4.5600,-6.6300) | 0 | 1 | 0 | 1 |
| SCQGSB1083A03.g | GS1_SS_17025_15294 | Signal Transduction       | kinase/phosphatase           | Protein kinase       | Undefined- unclassified                                                                                                                                         | caneUPK-53                                                                                                                                                                                                                                                          |                    | up (3.8200,2.7800)     |                        | 1 | 0 | 0 | 1 |
| SCAGRT2038H05.g | GS1_SS_12827_15904 | Signal Transduction       | kinase/phosphatase           | Receptors            | Receptor Ser/Thr kinase                                                                                                                                         | caneLrK10-1                                                                                                                                                                                                                                                         |                    |                        | up (5.0900,5.1200)     | 1 | 0 | 0 | 1 |
| SCEZRZ1014A03.g | GS1_SS_20028_01063 | Signal Transduction       | kinase/phosphatase           |                      | Pantothenate kinase 2 (Pantothenic acid kinase 2)                                                                                                               | unknown [Zea mays]                                                                                                                                                                                                                                                  |                    | up (1.8300,3.3300)     | up (3.6300,3.2700)     | 2 | 0 | 0 | 2 |
| SCJFRZ2027C05.g | GS1_SS_14966_17859 | Signal Transduction       | kinase/phosphatase           | Receptors            | receptor Ser/Thr kinase                                                                                                                                         | caneCLV1-7                                                                                                                                                                                                                                                          |                    | down (-2.4400,-4.3500) | down (-3.9800,-5.3500) | 0 | 2 | 0 | 2 |
| SCJLLR1104D05.g | GS1_SS_10683_10646 | Signal Transduction       | kinase/phosphatase           |                      | Carboxymethylenebutenolidase homolog                                                                                                                            | unknown [Zea mays]                                                                                                                                                                                                                                                  |                    |                        | down (-3.1700,-4.0100) | 0 | 1 | 0 | 1 |
| SCJFRZ2011E02.g | GS1_SS_14834_04894 | Signal Transduction       | kinase/phosphatase           |                      | inositol-tetrakisphosphate 1-kinase 2 (Inositol-triphosphate 5/6-kinase 2) (Inositol 1,3,4-trisphosphate 5/6-kinase 2) (Ins(1,3,4)P(3) 5/6-kinase 2) (At1tpk-2) | hypothetical protein LOC100194132 [Zea mays]<br>unknown [Zea mays]                                                                                                                                                                                                  |                    |                        | up (4.1000,4.8700)     | 1 | 0 | 0 | 1 |
| SCJLRT2049F12.g | GS1_SS_07861_16087 | Signal Transduction       | kinase/phosphatase           | Protein kinase       | MAPK/MAPKK/MAPKKK                                                                                                                                               | caneMAPK-21                                                                                                                                                                                                                                                         |                    |                        | up (4.1300,3.5600)     | 1 | 0 | 0 | 1 |
| SCJFRZ3C07E06.g | GS1_SS_15918_20293 | Signal Transduction       | kinase/phosphatase           | Receptors            | receptor Ser/Thr kinase                                                                                                                                         | caneRLK-DXV2                                                                                                                                                                                                                                                        |                    |                        | down (-3.9800,-3.7400) | 0 | 1 | 0 | 1 |
| SCCCLR2C01G05.g | GS1_SS_11287_03238 | Signal Transduction       | kinase/phosphatase           |                      | Putative receptor protein kinase TMK1;                                                                                                                          | SHR5-receptor-like kinase [Saccharum hybrid cultivar]                                                                                                                                                                                                               |                    |                        | up (2.5600,3.3600)     | 1 | 0 | 0 | 1 |

|                 |                    |                     |                             |                                             |                                                                                                                                                                                              |                                                                                                                |  |  |                        |   |   |   |   |
|-----------------|--------------------|---------------------|-----------------------------|---------------------------------------------|----------------------------------------------------------------------------------------------------------------------------------------------------------------------------------------------|----------------------------------------------------------------------------------------------------------------|--|--|------------------------|---|---|---|---|
| SCCST1003H06.g  | GS1_SS_07789_21514 | Signal Transduction | kinase/phosphatase          | Receptors                                   | receptor Ser/Thr kinase                                                                                                                                                                      | caneRLK-DI2                                                                                                    |  |  | up (4.3600,5.7000)     | 1 | 0 | 0 | 1 |
| SCVPST1059E02.g | GS1_SS_18260_17408 | Signal Transduction | kinase/phosphatase          | Protein kinase                              | cdpk                                                                                                                                                                                         | Family 4.2.1 - Calcium Dependent Protein Kinase (CPK)                                                          |  |  | down (-2.9100,-4.7400) | 0 | 1 | 0 | 1 |
| SCBFRZ2048D04.g | GS1_SS_03974_02428 | Signal Transduction | kinase/phosphatase          |                                             | CBL-interacting protein kinase 14: OsCIPK14                                                                                                                                                  | unknown [Zea mays]                                                                                             |  |  | up (1.1100,2.5400)     | 1 | 0 | 0 | 1 |
| SCEPRZ1011A11.g | GS1_SS_14297_03846 | Signal Transduction | kinase/phosphatase          |                                             | Protein phosphatase PTC7 homolog                                                                                                                                                             | Protein phosphatase 2C containing protein, expressed [Oryza sativa (japonica cultivar-group)]                  |  |  | down (-3.4300,-3.2200) | 0 | 1 | 0 | 1 |
| SCBFAM2025E08.g | GS1_SS_03837_15912 | Signal Transduction | kinase/phosphatase          | Protein kinase                              | RLCK                                                                                                                                                                                         | NAK                                                                                                            |  |  | down (-2.7900,-3.8600) | 0 | 2 | 0 | 2 |
| SCCCLR1C06C01.g | GS1_SS_16218_15589 | Signal Transduction | kinase/phosphatase          | Receptors                                   | receptor Ser/Thr kinase                                                                                                                                                                      | caneCLV1-1                                                                                                     |  |  | up (5.0900,3.2900)     | 1 | 0 | 0 | 1 |
| SCEQRT1029G10.g | GS1_SS_15800_21210 | Signal Transduction | kinase/phosphatase          | Receptors                                   | receptor Ser/Thr kinase                                                                                                                                                                      | caneRLK lectin domain-4                                                                                        |  |  | down (-2.5100,-4.9700) | 0 | 1 | 0 | 1 |
| SCEQRT3C04D05.g | GS1_SS_22120_10198 | Signal Transduction | kinase/phosphatase          |                                             |                                                                                                                                                                                              | gene X-like protein [Sorghum bicolor]                                                                          |  |  | up (4.9200,3.9600)     | 2 | 0 | 0 | 2 |
| SCCCHR1004D03.g | GS1_SS_15645_16608 | Signal Transduction | kinase/phosphatase          | Receptors                                   | receptor Ser/Thr kinase                                                                                                                                                                      | caneRLK-CII1                                                                                                   |  |  | down (-2.5400,-3.2900) | 0 | 2 | 0 | 2 |
| SCCCRZ2C04B09.g | GS1_SS_14990_16798 | Signal Transduction | kinase/phosphatase          | Protein phosphatase                         | serine/threonine PPM family                                                                                                                                                                  | PP2A/Subunit B                                                                                                 |  |  | down (-3.2600,-3.8500) | 0 | 1 | 0 | 1 |
| SCEZLB1009D04.g | GS1_SS_13925_19329 | Signal Transduction | kinase/phosphatase          | Cell cycle                                  |                                                                                                                                                                                              | hypothetical protein [Sorghum bicolor]                                                                         |  |  | up (1.8600,3.8300)     | 2 | 0 | 0 | 2 |
| SCJFRT1010C12.g | GS1_SS_24135_18369 | Signal Transduction | kinase/phosphatase          | Protein kinase                              | putative RLCK                                                                                                                                                                                | caneSIK putative protein-1                                                                                     |  |  | up (2.5400,3.3900)     | 1 | 0 | 0 | 1 |
| SCJLRT1014G05.g | GS1_SS_12458_08039 | Signal Transduction | kinase/phosphatase          |                                             | Probable tyrosine-protein phosphatase At1g05000                                                                                                                                              | unknown [Zea mays]                                                                                             |  |  | down (-1.1000,-2.2000) | 0 | 1 | 0 | 1 |
| SCBFRZ2050G04.g | GS1_SS_08070_01762 | Signal Transduction | kinase/phosphatase          |                                             | Mitogen-activated protein kinase 14 (MAP kinase 14)                                                                                                                                          | mitogen activated protein kinase 6 [Zea mays] mitogen activated protein kinase 6 [Zea mays]                    |  |  | down (-2.8400,-5.1700) | 0 | 1 | 0 | 1 |
| SCEZRT2019B08.g | GS1_SS_13212_09134 | Signal Transduction | kinase/phosphatase          |                                             | SAC domain-containing protein 3: FIG4 homolog                                                                                                                                                | hypothetical protein OsJ_009310 [Oryza sativa (japonica cultivar-group)]                                       |  |  | up (2.9800,3.1300)     | 1 | 0 | 0 | 1 |
| SCEQHR1081F09.g | GS1_SS_07593_16571 | Signal Transduction | kinase/phosphatase          | Receptors                                   | Receptor Ser/Thr kinase-unclassified                                                                                                                                                         | caneURLK-22                                                                                                    |  |  | down (-3.2100,-4.5100) | 0 | 1 | 0 | 1 |
| SCJLLR1103H01.g | GS1_SS_24575_18337 | Signal Transduction | kinase/phosphatase          | Carbohydrate metabolism                     | Galactose metabolism                                                                                                                                                                         | Galactokinase EC 2.7.1.6                                                                                       |  |  | up (5.6300,5.0900)     | 1 | 0 | 0 | 1 |
| SCQGSB1140C12.g | GS1_SS_21263_19003 | Signal Transduction | kinase/phosphatase          | Receptors                                   | receptor Ser/Thr kinase                                                                                                                                                                      | caneCR4-3                                                                                                      |  |  | down (-2.5300,-3.6400) | 0 | 2 | 0 | 2 |
| SCBFSB1045E02.g | GS1_SS_16720_16653 | Signal Transduction | ligase                      | Lipid, fatty-acid and isoprenoid metabolism | putative RING zinc finger protein                                                                                                                                                            | unknown [Zea mays]                                                                                             |  |  | down (-2.7900,-5.0400) | 0 | 2 | 0 | 2 |
| SCCCRZ2002B04.g | GS1_SS_08713_09224 | Signal Transduction | lipase                      |                                             |                                                                                                                                                                                              | unknown [Zea mays]                                                                                             |  |  | down (-3.0100,-3.1000) | 0 | 1 | 0 | 1 |
| SCEPAM1053C09.g | GS1_SS_20360_09819 | Signal Transduction | metalloprotease             |                                             | speckle-type POZ protein; HIB homolog 1; Roadkill homolog 1 Speckle-type POZ protein; HIB homolog 1; PDX-1 C-terminal-interacting factor 1 Speckle-type POZ protein Speckle-type POZ protein | unknown [Zea mays]                                                                                             |  |  | down (-1.6400,-2.2800) | 0 | 1 | 0 | 1 |
| SCCCLR2C01F06.g | GS1_SS_11286_19433 | Signal Transduction | others                      | Stress                                      | wound-induced                                                                                                                                                                                | wound-responsive family protein                                                                                |  |  | down (-2.0200,-1.9300) | 1 | 1 | 0 | 2 |
| SCCCLL4010F07.g | GS1_SS_06094_10836 | Signal Transduction | others                      |                                             | Rop guanine nucleotide exchange factor 1 (RopGEF1) (Kinase partner protein-like) (KPP-like)                                                                                                  | unknown [Zea mays]                                                                                             |  |  | down (-4.1000,-4.0600) | 0 | 1 | 0 | 1 |
| SCBGLR1118B02.g | GS1_SS_08110_16284 | Signal Transduction | others                      | Two component                               | response regulator (ARR-like)                                                                                                                                                                | Response regulator 7                                                                                           |  |  | down (-3.1800,-3.3300) | 0 | 2 | 0 | 2 |
| SCCCRZ2003H05.g | GS1_SS_01098_15058 | Signal Transduction | protein-protein interaction | Transcription Factor                        | hormone-related/auxin/Aux/IAA                                                                                                                                                                | Auxin-responsive protein IAA9                                                                                  |  |  | down (-2.4500,-2.6400) | 0 | 1 | 0 | 1 |
| SCQSRT2031H06.g | GS1_SS_13683_17635 | Signal Transduction | protein-protein interaction | Stress                                      | Water stress                                                                                                                                                                                 | induced                                                                                                        |  |  | down (-2.2400,-1.7400) | 2 | 1 | 0 | 3 |
| SCSGHR1067C04.g | GS1_SS_01814_00696 | Signal Transduction | protein-protein interaction | Receptors                                   | receptor Ser/Thr kinase                                                                                                                                                                      | caneRLK-DV3 (LRR)                                                                                              |  |  | down (-3.4100,-5.3700) | 0 | 2 | 0 | 2 |
| SCEPRZ3045E10.g | GS1_SS_20157_14564 | Signal Transduction | kinase                      | Protein kinase                              | MAPK/MAPKK/MAPKKK                                                                                                                                                                            | caneNRK-1                                                                                                      |  |  | up (4.9900,3.5800)     | 1 | 0 | 0 | 1 |
| SCBGLR1117G09.g | GS1_SS_18272_13256 | Signal Transduction | kinase                      | Protein kinase                              | Putative RLCK                                                                                                                                                                                | caneRLCK-AV2                                                                                                   |  |  | down (-2.9200,-3.2300) | 0 | 1 | 0 | 1 |
| SCJLRT2049D02.g | GS1_AS_01296_18211 | Signal Transduction | kinase                      | Protein kinase                              | other                                                                                                                                                                                        | caneTousled-1                                                                                                  |  |  | up (6.2600,6.5100)     | 1 | 0 | 0 | 1 |
| SCSGAM2075E08.g | GS1_AS_05087_21469 | Signal Transduction | kinase                      | Protein kinase                              | calcium-related                                                                                                                                                                              | caneCDPK-20                                                                                                    |  |  | up (2.8900,3.6300)     | 1 | 0 | 0 | 1 |
| SCRUFL3065A06.g | GS1_SS_22866_10088 | Signal Transduction | kinase                      |                                             | Uncharacterized protein sll0005                                                                                                                                                              | Os02g0816600 [Oryza sativa (japonica cultivar-group)]<br>Os02g0816600 [Oryza sativa (japonica cultivar-group)] |  |  | down (-2.8100,-4.4300) | 0 | 1 | 0 | 1 |
| SCEQRT2101A04.g | GS1_SS_07546_00754 | Signal Transduction | receptor                    |                                             | Xenotropic and polytropic retrovirus receptor 1 homolog                                                                                                                                      | unknown [Zea mays]                                                                                             |  |  | down (-1.8300,-1.8200) | 0 | 1 | 0 | 1 |
| SCCCLR3004D07.b | GS1_SS_05819_07196 | Signal Transduction | receptor                    |                                             | Probable gibberellin receptor GID1L1; GID1-like protein 1                                                                                                                                    | unknown [Zea mays]                                                                                             |  |  | down (-4.0700,-4.9700) | 0 | 1 | 0 | 1 |
| SCJFRT1060C03.g | GS1_SS_12307_02901 | Signal Transduction | ribosomal protein           |                                             | Putative ribonuclease H protein At1g65750                                                                                                                                                    | unknown [Zea mays]                                                                                             |  |  | up (3.5500,4.9000)     | 1 | 0 | 0 | 1 |
| SCVPRZ3029B05.g | GS1_SS_33378_21782 | Signal Transduction | targeting protein           | Transcription Factor                        | Aux/IAA                                                                                                                                                                                      | unknown [Zea mays]                                                                                             |  |  | up (4.2800,4.1300)     | 2 | 0 | 0 | 2 |
| SCAGLR1064B08.g | GS1_SS_22576_17541 | Signal Transduction | transcription factor        | Transcription Factor                        | hormone-related/ethylene/AP2/EREBP                                                                                                                                                           | AP2 domain-containing protein RAP2.3                                                                           |  |  | up (3.7100,6.5400)     | 1 | 0 | 0 | 1 |
| SCQGAM1046F11.g | GS1_SS_02800_21499 | Signal Transduction | transcription factor        | Protein metabolism                          | Early auxin-induced protein 22                                                                                                                                                               | Auxin response factor 16 hypothetical protein OsJ_019622 [Oryza sativa (japonica cultivar-group)]              |  |  | up (2.7300,3.0200)     | 1 | 0 | 0 | 1 |
| SCEPRT2048E07.g | GS1_SS_06752_18913 | Signal Transduction | transcription factor        | Two component                               | response regulator (ARR-like)                                                                                                                                                                | Response regulator 6                                                                                           |  |  | down (-2.6600,-3.5800) | 0 | 1 | 0 | 1 |

|                 |                    |                     |                        |                         |                                                                                                     |                                                                                                                                                                |  |                        |   |   |   |   |
|-----------------|--------------------|---------------------|------------------------|-------------------------|-----------------------------------------------------------------------------------------------------|----------------------------------------------------------------------------------------------------------------------------------------------------------------|--|------------------------|---|---|---|---|
| SCCCCL4002B07.g | GS1_SS_06324_18757 | Signal Transduction | transcription factor   | Transcription Factor    | AP2/EREBP                                                                                           | EREBP                                                                                                                                                          |  | up (5.6200,6.4400)     | 1 | 0 | 0 | 1 |
| SCVPLR2005H03.g | GS1_SS_02369_18630 | Signal Transduction | transcription factor   | Transcription Factor    | hormone-related/auxin/Aux/IAA                                                                       | Auxin-responsive protein IAA16                                                                                                                                 |  | down (-3.4700,-3.6100) | 0 | 2 | 0 | 2 |
| SCJLRZ1019A02.g | GS1_SS_14454_19561 | Signal Transduction | transcription factor   | Transcription Factor    | MYB                                                                                                 | unknown [Zea mays]                                                                                                                                             |  | down (-3.8900,-6.1800) | 0 | 1 | 0 | 1 |
| SCJFRZ2015F02.g | GS1_SS_14894_19741 | Signal Transduction | transcription factor   | Transcription Factor    | MYB                                                                                                 | unknown [Zea mays]                                                                                                                                             |  | down (-4.2800,-5.0000) | 0 | 1 | 0 | 1 |
| SCCCLR1C04F11.g | GS1_SS_16337_17285 | Signal Transduction | transcription factor   | Transcription Factor    | WRKY                                                                                                | zinc finger transcription factor WRKY1                                                                                                                         |  | up (2.6500,3.2600)     | 1 | 0 | 0 | 1 |
| SCCCCL3140E02.g | GS1_SS_08163_00789 | Signal Transduction | transcription factor   |                         | NAC domain-containing protein 77; ONAC077; ONAC300                                                  | unknown [Zea mays]                                                                                                                                             |  | up (3.8400,3.4400)     | 1 | 0 | 0 | 1 |
| SCEZRT2019E05.g | GS1_SS_07121_18103 | Signal Transduction | transcription factor   | Transcription Factor    | NAM (no apical meristem)                                                                            | NAC domain-containing protein 77                                                                                                                               |  | up (3.5700,3.1500)     | 1 | 0 | 0 | 1 |
| SCEQRT2093D08.g | GS1_SS_07042_18864 | Signal Transduction | transcription factor   | Transcription Factor    | hormone-related/auxin/Aux/IAA                                                                       | Auxin-responsive protein IAA12                                                                                                                                 |  | down (-3.3100,-5.0500) | 0 | 2 | 0 | 2 |
| SCCCLB1002G02.g | GS1_AS_00796_02724 | Signal Transduction | transcription factor   |                         | Long-chain-fatty-acid--CoA ligase 1; Long-chain acyl-CoA synthetase 1; LACS 1; Palmitoyl-CoA ligase | hypothetical protein Osl_004433 [Oryza sativa (japonica cultivar-group)]                                                                                       |  | up (1.9300,2.7400)     | 1 | 0 | 0 | 1 |
| SCMCL6049H11.g  | GS1_SS_06667_04784 | Signal Transduction | transcription factor   |                         |                                                                                                     | WRKY DNA-binding protein [Oryza sativa (indica cultivar-group)]                                                                                                |  | down (-2.3900,-3.6800) | 0 | 1 | 0 | 1 |
| SCEPAM2015F01.g | GS1_SS_04013_18978 | Signal Transduction | transcription factor   | Transcription Factor    | hormone-related/auxin                                                                               | B3 and AUX/IAA domains/Auxin response factor 1 (ARF1)                                                                                                          |  | down (-2.6200,-4.4600) | 0 | 1 | 0 | 1 |
| SCEZHR1083B10.g | GS1_SS_25265_20642 | Signal Transduction | transcription factor   | Transcription Factor    | HLH                                                                                                 | unknown [Zea mays]                                                                                                                                             |  | down (-3.8300,-4.4600) | 0 | 1 | 0 | 1 |
| SCSBHR1056H09.g | GS1_SS_19678_20080 | Signal Transduction | transcription factor   | Transcription Factor    | MYB                                                                                                 | unknown [Zea mays]                                                                                                                                             |  | up (2.1200,3.4500)     | 1 | 1 | 0 | 2 |
| SCEZRT2015G07.g | GS1_SS_02549_10966 | Signal Transduction | transcription factor   |                         | AP2-like ethylene-responsive transcription factor At2g41710                                         | unknown [Zea mays]                                                                                                                                             |  | down (-3.3700,-3.8200) | 0 | 1 | 0 | 1 |
| SCRURT2010A10.g | GS1_SS_19708_19813 | Signal Transduction | transcription factor   | Transcription Factor    | MYB                                                                                                 | Transcription factor (myb)                                                                                                                                     |  | down (-3.5900,-4.1900) | 0 | 2 | 0 | 2 |
| SCEPLR1008A10.g | GS1_SS_23522_14785 | Signal Transduction | transcription factor   | Transcription Factor    | hormone-related/auxin/Aux/IAA                                                                       | Auxin-responsive protein IAA31                                                                                                                                 |  | down (-2.4200,-4.2300) | 0 | 2 | 0 | 2 |
| SCEQRT1024G12.g | GS1_SS_00606_15578 | Signal Transduction | transcription factor   | Transcription Factor    | MYB                                                                                                 | hypothetical protein LOC100194332 [Zea mays] unknown [Zea mays]                                                                                                |  | down (-3.3500,-5.9000) | 0 | 1 | 0 | 1 |
| SCJFRZ2009F04.g | GS1_SS_18640_19368 | Signal Transduction | transcription factor   | Transcription Factor    | hormone-related/auxin/Aux/IAA                                                                       | Auxin-responsive protein IAA30                                                                                                                                 |  | down (-3.1400,-4.5000) | 0 | 1 | 0 | 1 |
| SCAGAD1073C08.g | GS1_SS_19747_12612 | Signal Transduction | transcription factor   |                         |                                                                                                     | hypothetical protein LOC100193483 [Zea mays] unknown [Zea mays]                                                                                                |  | down (-4.8600,-7.4400) | 0 | 2 | 0 | 2 |
| SCSBAD1085B04.g | GS1_SS_19582_21271 | Signal Transduction | transcription factor   | Transcription Factor    | MYB                                                                                                 | hypothetical protein Osl_037518 [Oryza sativa (indica cultivar-group)]                                                                                         |  | down (-4.0000,-3.6200) | 0 | 1 | 0 | 1 |
| SCJLRZ1024E12.g | GS1_SS_21320_04282 | Signal Transduction | transcription factor   | Transcription Factor    | GARP transfactor                                                                                    | Os06g0703900 [Oryza sativa (japonica cultivar-group)] putative transfactor [Oryza sativa Japonica Group] Os06g0703900 [Oryza sativa (japonica cultivar-group)] |  | down (-5.7400,-6.9100) | 0 | 1 | 0 | 1 |
| SCMCSB1116C07.g | GS1_SS_21714_03585 | Signal Transduction | transcription factor   |                         |                                                                                                     | hypothetical protein Osl_028987 [Oryza sativa (japonica cultivar-group)]                                                                                       |  | up (2.7800,2.6900)     | 2 | 0 | 0 | 2 |
| SCVPRZ3030F10.g | GS1_SS_16613_19521 | Signal Transduction | transcription factor   | Transcription Factor    | Trihelix                                                                                            | Os04g0541100 [Oryza sativa (japonica cultivar-group)] Os04g0541100 [Oryza sativa (japonica cultivar-group)]                                                    |  | up (2.1200,2.8700)     | 2 | 0 | 0 | 2 |
| SCEQLR1050A01.g | GS1_SS_07747_16950 | Signal Transduction | transcription factor   | Nucleic acid metabolism | regulation of transcription, DNA-dependent                                                          | DEAD box protein                                                                                                                                               |  | down (-4.0700,-6.6000) | 0 | 2 | 0 | 2 |
| SCCCCL6003A11.g | GS1_SS_17744_16222 | Signal Transduction | transcription factor   | Transcription Factor    | Aux/IAA                                                                                             | unknown [Zea mays]                                                                                                                                             |  | down (-2.9400,-3.3700) | 0 | 1 | 0 | 1 |
| SCQGST1032D08.g | GS1_SS_17182_20815 | Signal Transduction | transcription factor   | Transcription Factor    | MYB                                                                                                 | unknown [Zea mays]                                                                                                                                             |  | down (-4.5000,-4.8100) | 0 | 1 | 0 | 1 |
| SCMCRT2105A02.g | GS1_SS_16948_21060 | Signal Transduction | transcription factor   | Transcription Factor    | MYB                                                                                                 | hypothetical protein LOC100193196 [Zea mays] unknown [Zea mays] unknown [Zea mays]                                                                             |  | down (-4.0100,-5.6000) | 0 | 2 | 0 | 2 |
| SCEZLB1008F08.g | GS1_SS_20825_16504 | Signal Transduction | transcription factor   | Transcription Factor    | hormone-related/auxin                                                                               | B3 and AUX/IAA domains/Auxin response factor 6 (ARF6)                                                                                                          |  | down (-2.7400,-4.0800) | 0 | 1 | 0 | 1 |
| SCEQLR1007F11.g | GS1_SS_11642_17166 | Signal Transduction | transcription factor   | Transcription Factor    | Homeobox                                                                                            | unknown [Zea mays]                                                                                                                                             |  | down (-4.6700,-3.7800) | 0 | 1 | 0 | 1 |
| SCEQRT2027F03.g | GS1_SS_24101_09842 | Signal Transduction | transcription factor   | Transcription Factor    | Myb                                                                                                 | myb family transcription factor-like [Oryza sativa Japonica Group]                                                                                             |  | down (-3.4500,-4.5800) | 0 | 1 | 0 | 1 |
| SCEPRZ3086F09.g | GS1_SS_17350_07825 | Signal Transduction | Transcriptional Factor |                         | JmjC domain-containing protein 5; Jumonji domain-containing protein 5                               | unknown [Zea mays]                                                                                                                                             |  | down (-3.5900,-7.1000) | 0 | 1 | 0 | 1 |
| SCRFAM2128A12.g | GS1_SS_04922_18207 | Signal Transduction | Transcriptional Factor | Transcription Factor    | MADS                                                                                                | caneCKI-17                                                                                                                                                     |  | down (-4.5900,-5.2900) | 0 | 1 | 0 | 1 |
| SCSFHR1042G07.g | GS1_SS_08458_14656 | Signal Transduction | Transcriptional Factor | Transcription Factor    | WRKY                                                                                                | unknown [Zea mays]                                                                                                                                             |  | up (3.2700,3.2500)     | 1 | 0 | 0 | 1 |
| SCCCLR1079C08.g | GS1_SS_21356_20703 | Signal Transduction | Transcriptional Factor | Transcription Factor    | Others                                                                                              | HGM                                                                                                                                                            |  | down (-4.3600,-5.0800) | 0 | 1 | 0 | 1 |

|                 |                    |                     |                                            |                         |                                                                                                                      |                                                                                                                      |                        |                        |   |   |   |   |
|-----------------|--------------------|---------------------|--------------------------------------------|-------------------------|----------------------------------------------------------------------------------------------------------------------|----------------------------------------------------------------------------------------------------------------------|------------------------|------------------------|---|---|---|---|
| SCEQAM2039A10.g | GS1_SS_24094_21208 | Signal Transduction | Transcriptional Factor                     | Transcription Factor    | hormone-related/gibberellin                                                                                          | Gibberellin response modulator hypothetical protein Osl_030866 [Oryza sativa (indica cultivar-group)]                |                        | down (-3.7800,-4.7300) | 0 | 1 | 0 | 1 |
| SCCST3006E12.g  | GS1_SS_18371_02905 | Signal Transduction | Uncharacterized                            |                         | Auxin-induced in root cultures protein 12;                                                                           |                                                                                                                      |                        | down (-3.8100,-4.1000) | 0 | 1 | 0 | 1 |
| SCVPLB1017D05.g | GS1_SS_09530_20091 | Signal Transduction | Uncharacterized                            | Stress                  |                                                                                                                      | induced                                                                                                              |                        | up (5.9200,5.1400)     | 1 | 0 | 0 | 1 |
| SCEZLB1008D09.g | GS1_SS_24236_20445 | Signal Transduction | Uncharacterized                            | Transcription Factor    | SBP (squamosa promoter binding protein)                                                                              | SBP-domain protein 5                                                                                                 |                        | down (-3.9400,-6.1300) | 0 | 1 | 0 | 1 |
| SCCCL5071H01.g  | GS1_SS_03343_11640 | Signal Transduction | Uncharacterized                            |                         | Coleoptile phototropism protein 1 (Non-phototropic hypocotyl 3-like protein) (NPH3-like protein)                     | unknown [Zea mays]                                                                                                   |                        | up (2.4900,2.7400)     | 1 | 0 | 0 | 1 |
| SCMCL6053D03.g  | GS1_SS_28758_18327 | Signal Transduction | zinc-binding protein                       | Transcription Factor    | Zinc finger proteins                                                                                                 | C2C2                                                                                                                 |                        | up (5.0000,3.8700)     | 1 | 0 | 0 | 1 |
| SCEPLB1042B08.g | GS1_SS_00283_19610 | Signal Transduction |                                            | Carbohydrate metabolism | Starch synthase                                                                                                      | pseudo-response regulator 1 [Arabidopsis thaliana]                                                                   |                        | down (-3.8900,-3.6300) | 0 | 1 | 0 | 1 |
| SCAGLR1021F02.g | GS1_SS_20432_08284 | Signal Transduction |                                            |                         | SAC domain-containing protein 3; FIG4 homolog                                                                        | hypothetical protein Osl_010031 [Oryza sativa (indica cultivar-group)]                                               |                        | up (2.7600,2.8300)     | 1 | 0 | 0 | 1 |
| SCAGFL3024G12.g | GS1_SS_22570_11616 | Sulphur metabolism  | transporter                                |                         | Probable sulfate transporter 3.3; AST91                                                                              | hypothetical protein Osl_021458 [Oryza sativa (japonica cultivar-group)]                                             |                        | down (-3.3300,-5.3100) | 0 | 1 | 0 | 1 |
| SCRURT2012H06.g | GS1_SS_13826_14124 | Transporters        | channel                                    |                         | Ras-related protein RABH1B                                                                                           | unknown [Zea mays]                                                                                                   |                        | up (4.8400,3.5200)     | 1 | 0 | 0 | 1 |
| SCBGRT1050B11.g | GS1_SS_11936_13398 | Transporters        | hydrolase                                  |                         | Calcium-transporting ATPase 1, endoplasmic reticulum-type                                                            | hypothetical protein Osl_017571 [Oryza sativa (indica cultivar-group)]                                               |                        | up (3.1500,3.9300)     | 1 | 0 | 0 | 1 |
| SCEQRT1024C07.g | GS1_SS_12011_14550 | Transporters        | kinase/phosphatase                         |                         | Pyrophosphate-energized vacuolar membrane proton pump; Pyrophosphate-energized inorganic pyrophosphatase; H(+)-PPase | proton translocating pyrophosphatase [Oryza sativa]                                                                  |                        | up (4.1700,3.6500)     | 1 | 0 | 0 | 1 |
| SCQSHR1024F04.g | GS1_SS_07499_06860 | Transporters        | Membrane transporters ABC transporter      |                         | Probable white-brown complex homolog protein 16                                                                      | unknown [Zea mays]                                                                                                   |                        | up (5.2800,4.5200)     | 1 | 0 | 0 | 1 |
| SCEZRT3070D05.g | GS1_SS_25332_01944 | Transporters        | Membrane transporters ABC transporter      |                         | Multidrug resistance protein 9 (P-glycoprotein 9)                                                                    | hypothetical protein Osl_003330 [Oryza sativa (indica cultivar-group)]                                               |                        | up (5.4500,4.8900)     | 1 | 0 | 0 | 1 |
| SCEQRT1027D08.g | GS1_SS_01904_02882 | Transporters        | Membrane transporters ABC transporter      |                         | Pleiotropic drug resistance protein 3; OsPDR9                                                                        | Pleiotropic drug resistance protein 3; OsPDR9 hypothetical protein Osl_002763 [Oryza sativa (indica cultivar-group)] |                        | up (3.3800,3.5200)     | 1 | 0 | 0 | 1 |
| SCQGHR1014E03.g | GS1_SS_07879_15885 | Transporters        | Membrane transporters Nodulin-like protein | Stress                  | infected library                                                                                                     | Nodulin (MtN21)                                                                                                      |                        | down (-5.7900,-6.2100) | 0 | 2 | 0 | 2 |
| SCJFRZ2014D05.g | GS1_SS_01342_10250 | Transporters        | Membrane transporters Nodulin-like protein |                         | Auxin-induced protein 5NG4                                                                                           | unknown [Zea mays]                                                                                                   | down (-3.0300,-1.4100) | up (1.8900,3.4100)     | 1 | 1 | 0 | 2 |
| SCJFRT1059C11.g | GS1_SS_12288_21519 | Transporters        | MIP                                        | Stress                  | Others                                                                                                               | Drought and cold response                                                                                            |                        | up (6.0400,2.9200)     | 1 | 0 | 0 | 1 |
| SCBFFL4113C07.g | GS1_SS_24221_00216 | Transporters        | others                                     |                         | Peptide transporter PTR2; Histidine-transporting protein                                                             | unknown [Zea mays]                                                                                                   |                        | down (-5.4900,-6.8300) | 0 | 2 | 0 | 2 |
| SCCCLR1C04G11.g | GS1_AS_19109_01090 | Transporters        | translocator                               |                         |                                                                                                                      | unknown [Zea mays]                                                                                                   |                        | up (3.6500,3.5700)     | 2 | 0 | 0 | 2 |
| SCQGRT1042A05.g | GS1_SS_12681_15506 | Transporters        | translocator                               | Protein metabolism      | Signal recognition particle 54 kDa protein, chloroplast precursor (SRP54) (54 chloroplast p                          | unknown [Zea mays]                                                                                                   |                        | down (-3.0600,-2.8400) | 0 | 1 | 0 | 1 |
| SCCCLR1C04G11.g | GS1_SS_19109_01089 | Transporters        | translocator                               |                         |                                                                                                                      | unknown [Zea mays]                                                                                                   |                        | up (5.9600,3.9000)     | 2 | 0 | 0 | 2 |
| SCJFAM1067F03.b | GS1_SS_25840_13009 | Transporters        | transporter                                |                         | Boron transporter-like protein 2                                                                                     | unknown [Zea mays]                                                                                                   |                        | down (-4.2800,-6.2500) | 0 | 1 | 0 | 1 |
| SCJFAM1067F03.g | GS1_SS_02429_06002 | Transporters        | transporter                                |                         | Boron transporter-like protein 2                                                                                     | unknown [Zea mays]                                                                                                   |                        | down (-4.3100,-4.9100) | 0 | 1 | 0 | 1 |
| SCMCL6053C09.g  | GS1_SS_06720_17873 | Transporters        | transporter                                | Cell cycle              | peptide transport protein homolog                                                                                    | Os01g0871500 [Oryza sativa (japonica cultivar-group)]<br>Os01g0871500 [Oryza sativa (japonica cultivar-group)]       |                        | down (-3.4000,-3.4000) | 0 | 1 | 0 | 1 |
| SCEZRZ3016G06.g | GS1_SS_18922_18909 | Transporters        | transporter                                | Transporters            | Sugar transporters                                                                                                   | putative sugar transporter [Oryza sativa]                                                                            |                        | down (-4.7600,-5.1800) | 0 | 1 | 0 | 1 |
| SCJLRZ3076A04.b | GS1_SS_15996_18583 | Transporters        | transporter                                | Protein metabolism      | Arsenite transport protein (ARSB)                                                                                    | unknown [Zea mays]                                                                                                   |                        | down (-3.2600,-3.0800) | 0 | 1 | 0 | 1 |
| SCEPFL3081B06.g | GS1_SS_17846_12980 | Transporters        | transporter                                |                         |                                                                                                                      | unknown [Zea mays]                                                                                                   |                        | down (-5.5100,-5.4200) | 0 | 1 | 0 | 1 |
| SCJFHR1C03B08.g | GS1_SS_07825_01043 | Transporters        | transporter                                |                         | Peptide transporter PTR2; Histidine-transporting protein                                                             | hypothetical protein Osl_036617 [Oryza sativa (indica cultivar-group)]                                               |                        | down (-3.8100,-5.0000) | 0 | 2 | 0 | 2 |
| SCEQRT1030B05.g | GS1_SS_17430_19886 | Transporters        | transporter                                | Transporters            | Transmembrane amino acid transporter protein (Aa_trans)                                                              | unknown [Zea mays]                                                                                                   |                        | up (2.1200,2.9600)     | 1 | 0 | 0 | 1 |
| SCEZAM2031A08.g | GS1_SS_04157_17040 | Transporters        | transporter                                | No matches              |                                                                                                                      |                                                                                                                      |                        | down (-4.0200,-5.9400) | 1 | 1 | 0 | 2 |
| SCAGLR2018G04.g | GS1_SS_09989_06827 | Transporters        | transporter                                |                         | RING-H2 finger protein ATL1B                                                                                         | unknown [Zea mays]                                                                                                   |                        | down (-4.0700,-4.8100) | 0 | 1 | 0 | 1 |

|                 |                    |                              |                      |              |                                                                                                                                        |                                                                                                                                                                                                                                                                      |                        |                        |  |   |   |   |   |
|-----------------|--------------------|------------------------------|----------------------|--------------|----------------------------------------------------------------------------------------------------------------------------------------|----------------------------------------------------------------------------------------------------------------------------------------------------------------------------------------------------------------------------------------------------------------------|------------------------|------------------------|--|---|---|---|---|
| SCSGAD1008G12.g | GS1_SS_01414_11953 | Transporters                 | transporter          | .            | Multidrug resistance-associated protein 4; Glutathione S-conjugate-transporting ATPase 4; ATP-energized glutathione S-conjugate pump 4 | hypothetical protein Osl_014322 [Oryza sativa (indica cultivar-group)]                                                                                                                                                                                               | up (1.2300,1.5900)     |                        |  | 1 | 0 | 0 | 1 |
| SCEZLB1008D12.g | GS1_SS_25529_14609 | Transporters                 | transporter          | Transporters | Major intrinsic protein (MIP)                                                                                                          | unknown [Zea mays]                                                                                                                                                                                                                                                   |                        | up (4.7300,5.5800)     |  | 1 | 0 | 0 | 1 |
| SCAGAD1077C06.g | GS1_SS_19784_10342 | Transporters                 | transporter          | .            | .                                                                                                                                      | hypothetical protein Osl_031543 [Oryza sativa (japonica cultivar-group)]                                                                                                                                                                                             |                        | up (2.2300,2.5800)     |  | 1 | 0 | 0 | 1 |
| SCQSHR1022H06.g | GS1_SS_22805_08816 | Transporters                 | transporter          | .            | Probable sulfate transporter 3.4                                                                                                       | unknown [Zea mays]                                                                                                                                                                                                                                                   | up (2.1100,4.5500)     | up (3.6000,4.6400)     |  | 2 | 0 | 0 | 2 |
| SCEZHR1048H09.g | GS1_SS_07642_16466 | Transporters                 | transporter          | Stress       | infected library                                                                                                                       | CLC-d chloride channel/anion channel protein                                                                                                                                                                                                                         | up (1.3700,1.7300)     |                        |  | 1 | 0 | 0 | 1 |
| SCCCSD2C03E07.g | GS1_SS_25499_08928 | Transporters                 | Transporters         | .            | White-brown complex homolog protein 2                                                                                                  | hypothetical protein Osl_017568 [Oryza sativa (indica cultivar-group)]                                                                                                                                                                                               |                        | up (3.3200,3.3600)     |  | 1 | 0 | 0 | 1 |
| SCJFRT1059B01.g | GS1_SS_14034_18210 | Transporters                 | Transporters         | Transporters | (xan_ur_permease)                                                                                                                      | permease 1 [Zea mays]<br>Nucleobase-ascorbate transporter LPE1; Leaf permease protein 1 permease 1 [Zea mays]                                                                                                                                                        |                        | up (5.6700,4.1800)     |  | 1 | 0 | 0 | 1 |
| SCBGLR1047G11.g | GS1_SS_07822_20133 | Transporters                 | Transporters         | Transporters | Transmembrane amino acid transporter protein (Aa_trans)                                                                                | unknown [Zea mays]                                                                                                                                                                                                                                                   |                        | up (4.1800,3.9300)     |  | 1 | 0 | 0 | 1 |
| SCCCCL6005D07.g | GS1_SS_06508_05364 | Transporters                 | Transporters         | .            | Multidrug resistance-associated protein 5; Glutathione S-conjugate-transporting ATPase 5; ATP-energized glutathione S-conjugate pump 5 | low phytic acid 1 [Zea mays] low phytic acid 1 [Zea mays]                                                                                                                                                                                                            | up (2.8400,2.7800)     |                        |  | 1 | 0 | 0 | 1 |
| SCAGLR2026C05.g | GS1_SS_08080_12307 | Transporters                 | Transporters         | .            | .                                                                                                                                      | unknown [Zea mays]                                                                                                                                                                                                                                                   | down (-2.7600,-3.5400) | down (-3.6200,-3.8800) |  | 0 | 2 | 0 | 2 |
| SCMCRT2104G02.g | GS1_SS_07178_19847 | Transporters                 | Transporters         | Transporters | Transmembrane amino acid transporter protein (Aa_trans)                                                                                | unknown [Zea mays]                                                                                                                                                                                                                                                   |                        | up (2.9700,3.9900)     |  | 1 | 0 | 0 | 1 |
| SCSGFL4C08B10.g | GS1_SS_22942_15410 | Transporters                 | Transporters         | Transporters | POT family (PTR2)                                                                                                                      | hypothetical protein LOC100191709 [Zea mays]<br>unknown [Zea mays]                                                                                                                                                                                                   |                        | down (-7.1700,-4.2400) |  | 0 | 1 | 0 | 1 |
| SCRLAM1008F10.g | GS1_SS_03051_10950 | Transporters                 | Transporters         | .            | Oligopeptide transporter 7; AtOPT7                                                                                                     | Os06g0125400 [Oryza sativa (japonica cultivar-group)]<br>putative sexual differentiation process protein isp4 [Oryza sativa Japonica Group]<br>Os06g0125400 [Oryza sativa (japonica cultivar-group)]<br>hypothetical protein Osl_020708 [Oryza sativa (indica culti  |                        | up (3.5700,3.6100)     |  | 1 | 0 | 0 | 1 |
| SCACLR1126C04.g | GS1_SS_20075_02432 | Transporters                 | .                    | .            | Protein TRANSPARENT TESTA 12                                                                                                           | hypothetical protein LOC100191901 [Zea mays]<br>unknown [Zea mays]                                                                                                                                                                                                   |                        | up (4.5000,2.9200)     |  | 1 | 0 | 0 | 1 |
| SCJFRZ2005F08.g | GS1_SS_01259_09895 | Transporters                 | .                    | .            | Peptide transporter PTR2; Histidine-transporting protein                                                                               | unknown [Zea mays]                                                                                                                                                                                                                                                   |                        | down (-4.0300,-5.5700) |  | 0 | 1 | 0 | 1 |
| SCCCCL3001B06.g | GS1_SS_05409_16585 | Transporters                 | .                    | Transporters | Transmembrane amino acid transporter protein (Aa_trans)                                                                                | unknown [Zea mays]                                                                                                                                                                                                                                                   | up (1.8800,1.1900)     |                        |  | 1 | 0 | 0 | 1 |
| SCEPRZ1009H11.g | GS1_SS_16533_19194 | Transporters                 | .                    | Transporters | Transmembrane amino acid transporter protein (Aa_trans)                                                                                | Os05g0424000 [Oryza sativa (japonica cultivar-group)]<br>putative amino acid transporter [Oryza sativa (japonica cultivar-group)]<br>Os05g0424000 [Oryza sativa (japonica cultivar-group)]<br>hypothetical protein Osl_019340 [Oryza sativa (indica cultivar-group)] |                        | down (-5.1500,-4.0700) |  | 0 | 1 | 0 | 1 |
| SCEPSD2073G05.g | GS1_SS_25947_09753 | Transposable element related | nucleic acid binding | .            | .                                                                                                                                      | putative MURAZC [Zea mays]                                                                                                                                                                                                                                           |                        | up (3.1500,3.3700)     |  | 1 | 0 | 0 | 1 |
| SCJLST1020F05.g | GS1_SS_07880_06470 | Unknown                      | ATP synthase         | .            | .                                                                                                                                      | hypothetical protein LOC100194276 [Zea mays]<br>unknown [Zea mays]                                                                                                                                                                                                   |                        | down (-4.3000,-6.8000) |  | 0 | 1 | 0 | 1 |
| SCRFHR1006H10.g | GS1_AS_07908_17435 | Unknown                      | bacteria             | No matches   | .                                                                                                                                      | .                                                                                                                                                                                                                                                                    |                        | down (-3.8900,-5.3900) |  | 0 | 1 | 0 | 1 |
| SCJFRZ1006B05.g | GS1_SS_07772_00349 | Unknown                      | dehydrogenase        | .            | Probable aldehyde dehydrogenase; Flax-inducible sequence 1                                                                             | putative aldehyde dehydrogenase MIS1 [Zea mays]                                                                                                                                                                                                                      |                        | up (3.7300,3.2900)     |  | 1 | 0 | 0 | 1 |

|                 |                    |         |                    |                  |                                                                                                                  |                                                                                                                                             |  |                        |                        |   |   |   |   |
|-----------------|--------------------|---------|--------------------|------------------|------------------------------------------------------------------------------------------------------------------|---------------------------------------------------------------------------------------------------------------------------------------------|--|------------------------|------------------------|---|---|---|---|
| SCSGST1068B03.g | GS1_SS_01714_12885 | Unknown | GTPase             |                  | Spo0B-associated GTP-binding protein                                                                             | hypothetical protein Osl_024509 [Oryza sativa (japonica cultivar-group)]                                                                    |  |                        | down (-3.2900,-3.7300) | 0 | 1 | 0 | 1 |
| SCMCLR1053E06.g | GS1_AS_21705_18834 | Unknown | hydrolase          | lipid metabolism | MLO-like protein 4; AtMlo4                                                                                       | Putative lysophospholipase                                                                                                                  |  | up (4.2500,5.1300)     |                        | 1 | 0 | 0 | 1 |
| SCCCSD2001B07.g | GS1_SS_25461_00978 | Unknown | inhibitor          |                  | Subtilisin-chymotrypsin inhibitor-2A (CI-2A)                                                                     | MPI [Zea diploperennis] MPI [Zea perennis] MPI [Zea perennis]                                                                               |  |                        | up (8.2700,7.0300)     | 1 | 0 | 0 | 1 |
| SCJFRT1061G09.g | GS1_SS_12346_13960 | Unknown | kinase/phosphatase |                  | Nucleotide pyrophosphatase/phosphodiesterase                                                                     | LOC100191759 [Zea mays] unknown [Zea mays]                                                                                                  |  | down (-5.3900,-6.4000) | down (-3.4900,-4.1400) | 0 | 2 | 0 | 2 |
| SCJLST1025F01.g | GS1_SS_03716_02296 | Unknown | kinase/phosphatase |                  |                                                                                                                  |                                                                                                                                             |  | down (-2.9800,-6.0200) |                        | 0 | 1 | 0 | 1 |
| SCVPRZ3029B10.g | GS1_SS_33379_17011 | Unknown | kinase/phosphatase | Receptors        | Receptor Ser/Thr kinase                                                                                          | caneWAK-14 (wall-associated kinase)                                                                                                         |  |                        | down (-5.7400,-5.9000) | 0 | 1 | 0 | 1 |
| SCUTSB1031H05.g | GS1_SS_17391_14928 | Unknown | kinase/phosphatase | Protein kinase   | Cell cycle-related                                                                                               | caneCDC2-7                                                                                                                                  |  | down (-3.1500,-3.1600) |                        | 0 | 1 | 0 | 1 |
| SCVPFL3047F02.b | GS1_SS_22369_08794 | Unknown | kinase/phosphatase |                  | Bifunctional purple acid phosphatase 26; Includes: Acid phosphatase; Includes: Peroxidase;                       | unknown [Zea mays]                                                                                                                          |  |                        | up (3.9900,3.4200)     | 1 | 0 | 0 | 1 |
| SCEQSD2078G04.g | GS1_SS_42314_18381 | Unknown | kinase/phosphatase | Pathogenicity    | R-genes                                                                                                          | caneXa21-20                                                                                                                                 |  | up (2.6300,3.0400)     |                        | 1 | 0 | 0 | 1 |
| SCCCST1005H10.g | GS1_SS_08877_21083 | Unknown | methyltransferase  | Stress           | drought and cold response                                                                                        | early-responsive to dehydration stress protein (erd3-like)                                                                                  |  |                        | up (3.6800,4.0400)     | 1 | 0 | 0 | 1 |
| SCEQRT1031D05.g | GS1_SS_17169_12484 | Unknown | methyltransferase  |                  | Phosphoethanolamine N-methyltransferase 1; PEAMT 1; AtNMT1                                                       | unknown [Zea mays]                                                                                                                          |  | up (2.5400,2.9100)     |                        | 1 | 0 | 0 | 1 |
| SCEPLB1041E10.g | GS1_SS_05313_18090 | Unknown | methyltransferase  | Stress           | drought and cold response                                                                                        | early-responsive to dehydration stress protein (erd3-like)                                                                                  |  |                        | down (-4.7800,-6.5700) | 0 | 1 | 0 | 1 |
| SCRLAM1008E06.g | GS1_SS_19310_08151 | Unknown | motor protein      |                  | Ribosome-binding protein 1; Ribosome receptor protein; 180 kDa ribosome receptor homolog; ES/130-related protein | hypothetical protein Osl_008955 [Oryza sativa (indica cultivar-group)]                                                                      |  |                        | down (-3.2700,-5.4200) | 0 | 1 | 0 | 1 |
| SCCCAM2C06A08.g | GS1_SS_05619_13903 | Unknown | no matches         |                  |                                                                                                                  |                                                                                                                                             |  | up (4.8400,3.0100)     | up (3.7300,4.8500)     | 2 | 0 | 0 | 2 |
| SCBGLR1002B09.g | GS1_SS_16279_00786 | Unknown | no matches         |                  |                                                                                                                  |                                                                                                                                             |  |                        | down (-4.4500,-3.7500) | 0 | 1 | 0 | 1 |
| SCAGFL3022F05.g | GS1_SS_22556_11250 | Unknown | no matches         |                  |                                                                                                                  |                                                                                                                                             |  | up (2.5900,2.6200)     | up (5.1600,5.5200)     | 2 | 0 | 0 | 2 |
| SCACSD2018G06.g | GS1_SS_25493_01997 | Unknown | no matches         | No matches       |                                                                                                                  |                                                                                                                                             |  |                        | up (3.8700,7.0400)     | 1 | 0 | 0 | 1 |
| SCACLR1126E09.g | GS1_SS_09869_21044 | Unknown | no matches         | No matches       |                                                                                                                  |                                                                                                                                             |  |                        | down (-4.6400,-4.9600) | 0 | 1 | 0 | 1 |
| SCCCLB1004B04.g | GS1_AS_08853_01039 | Unknown | no matches         |                  |                                                                                                                  |                                                                                                                                             |  | up (2.0500,3.7700)     |                        | 1 | 0 | 0 | 1 |
| SCCCLR1075G06.g | GS1_SS_08894_12329 | Unknown | no matches         |                  |                                                                                                                  |                                                                                                                                             |  |                        | down (-4.2400,-5.4200) | 0 | 1 | 0 | 1 |
| SCBGFL5082D09.g | GS1_AS_23288_07140 | Unknown | no matches         |                  |                                                                                                                  |                                                                                                                                             |  | down (-2.2200,-4.0900) |                        | 0 | 1 | 0 | 1 |
| SCBGLR1097F08.g | GS1_SS_09904_02249 | Unknown | no matches         |                  |                                                                                                                  |                                                                                                                                             |  | up (4.2700,3.0500)     |                        | 1 | 0 | 0 | 1 |
| SCACRZ3036E03.g | GS1_SS_15261_16985 | Unknown | no matches         | No matches       |                                                                                                                  |                                                                                                                                             |  |                        | down (-4.3800,-5.4200) | 0 | 1 | 0 | 1 |
| SCCCLR2C01C08.g | GS1_SS_11280_04357 | Unknown | no matches         |                  |                                                                                                                  |                                                                                                                                             |  | up (1.3200,1.5100)     |                        | 1 | 0 | 0 | 1 |
| SCCCL4007D09.g  | GS1_SS_06055_10447 | Unknown | no matches         |                  |                                                                                                                  |                                                                                                                                             |  | up (2.3200,4.3000)     | up (6.4100,6.5400)     | 2 | 0 | 0 | 2 |
| SCBGLR1115D10.g | GS1_SS_18145_17897 | Unknown | no matches         | No matches       | non-coding                                                                                                       |                                                                                                                                             |  | up (3.7100,3.4900)     |                        | 1 | 0 | 0 | 1 |
| SCCCLR2C02F09.g | GS1_SS_11309_07707 | Unknown | no matches         |                  |                                                                                                                  |                                                                                                                                             |  | down (-2.4700,-3.3100) | down (-3.4100,-6.5900) | 0 | 2 | 0 | 2 |
| SCBFRT1064H06.g | GS1_SS_11768_01958 | Unknown | no matches         |                  |                                                                                                                  |                                                                                                                                             |  | down (-2.1400,-3.2500) |                        | 0 | 1 | 0 | 1 |
| SCACSD2014F07.g | GS1_SS_26292_06600 | Unknown | no matches         |                  |                                                                                                                  |                                                                                                                                             |  |                        | up (3.5700,3.5000)     | 1 | 0 | 0 | 1 |
| SCACRZ3036E03.g | GS1_AS_15261_16984 | Unknown | no matches         | No matches       |                                                                                                                  |                                                                                                                                             |  |                        | down (-3.6600,-4.3200) | 0 | 1 | 0 | 1 |
| SCBFLB2095D11.g | GS1_SS_25852_13258 | Unknown | no matches         |                  |                                                                                                                  |                                                                                                                                             |  | down (-2.2400,-5.2300) | down (-3.0700,-3.4400) | 0 | 2 | 0 | 2 |
| SCACLR1126G08.g | GS1_SS_09620_01141 | Unknown | no matches         |                  |                                                                                                                  |                                                                                                                                             |  | down (-2.9000,-2.7300) | down (-3.2000,-4.2300) | 0 | 2 | 0 | 2 |
| SCCCLR1C11G04.g | GS1_SS_10833_13109 | Unknown | no matches         |                  |                                                                                                                  |                                                                                                                                             |  |                        | up (3.1100,4.9200)     | 1 | 0 | 0 | 1 |
| SCCCLR1072H12.g | GS1_AS_11447_00378 | Unknown | no matches         |                  |                                                                                                                  |                                                                                                                                             |  | up (2.9000,2.9500)     |                        | 1 | 0 | 0 | 1 |
| SCACSB1036E06.g | GS1_SS_03359_12105 | Unknown | no matches         |                  |                                                                                                                  |                                                                                                                                             |  |                        | up (3.0800,4.3000)     | 1 | 0 | 0 | 1 |
| SCCCCL4017D01.g | GS1_SS_06414_05448 | Unknown | others             |                  |                                                                                                                  | hypothetical protein SORBIDRAFT_05g023750 [Sorghum bicolor] hypothetical protein SORBIDRAFT_05g023750 [Sorghum bicolor]                     |  |                        | up (2.9100,4.2400)     | 1 | 0 | 0 | 1 |
| SCCCLR2004G12.g | GS1_SS_18856_00961 | Unknown | others             |                  |                                                                                                                  | unknown [Zea mays]                                                                                                                          |  | up (5.1200,3.2900)     |                        | 1 | 0 | 0 | 1 |
| SCBGAD1026G02.g | GS1_SS_08893_06172 | Unknown | others             |                  |                                                                                                                  | Lipase, putative, expressed [Oryza sativa (japonica cultivar-group)] hypothetical protein Osl_037622 [Oryza sativa (indica cultivar-group)] |  | down (-3.3200,-4.4800) | down (-6.0100,-6.4100) | 0 | 2 | 0 | 2 |
| SCBGST3107A01.g | GS1_SS_21249_09170 | Unknown | others             |                  |                                                                                                                  | unknown [Zea mays]                                                                                                                          |  |                        | down (-3.6700,-5.6600) | 0 | 1 | 0 | 1 |
| SCCCRZ2003H01.g | GS1_SS_03682_02989 | Unknown | others             |                  |                                                                                                                  | unknown [Zea mays]                                                                                                                          |  | down (-6.7000,-5.4300) | up (3.9000,3.3900)     | 1 | 1 | 0 | 2 |
| SCACLB1046B10.g | GS1_SS_08871_08840 | Unknown | others             |                  |                                                                                                                  | hypothetical protein SORBIDRAFT_03g045310 [Sorghum bicolor] hypothetical protein SORBIDRAFT_03g045310 [Sorghum bicolor]                     |  | down (-2.1900,-2.3200) | down (-2.6800,-4.5100) | 0 | 2 | 0 | 2 |
| SCCCRZ2C04F06.g | GS1_SS_15870_02299 | Unknown | others             |                  |                                                                                                                  | unknown [Zea mays]                                                                                                                          |  |                        | down (-5.9900,-5.3900) | 0 | 1 | 0 | 1 |



|                 |                    |         |                             |                         |                                                                                                                                                                                      |                                                                                                                                                                                                         |  |                        |                        |   |   |   |   |
|-----------------|--------------------|---------|-----------------------------|-------------------------|--------------------------------------------------------------------------------------------------------------------------------------------------------------------------------------|---------------------------------------------------------------------------------------------------------------------------------------------------------------------------------------------------------|--|------------------------|------------------------|---|---|---|---|
| SCCCLR1078G03.g | GS1_SS_10546_12685 | Unknown | others                      | .                       | .                                                                                                                                                                                    | Os06g0502800 [Oryza sativa (japonica cultivar-group)]                                                                                                                                                   |  | up (6.6100,4.4600)     | up (4.4100,5.9500)     | 2 | 0 | 0 | 2 |
| SCBGLR1096E09.g | GS1_SS_15900_08023 | Unknown | others                      | .                       | .                                                                                                                                                                                    | Os06g0502800 [Oryza sativa (japonica cultivar-group)]                                                                                                                                                   |  |                        | down (-3.8200,-3.8200) | 0 | 1 | 0 | 1 |
| SCAGAM2122A09.g | GS1_SS_17829_12391 | Unknown | others                      | .                       | .                                                                                                                                                                                    | hypothetical protein OsJ_021686 [Oryza sativa (japonica cultivar-group)]                                                                                                                                |  |                        | down (-4.4000,-4.1500) | 0 | 1 | 0 | 1 |
| SCBFLR1083G03.g | GS1_SS_01635_09392 | Unknown | others                      | .                       | .                                                                                                                                                                                    | hypothetical protein LOC100191296 [Zea mays]                                                                                                                                                            |  |                        | down (-3.7100,-4.1900) | 0 | 1 | 0 | 1 |
| SCBFLR1005H01.g | GS1_SS_16661_12921 | Unknown | others                      | .                       | .                                                                                                                                                                                    | unknown [Zea mays]                                                                                                                                                                                      |  |                        | up (5.1400,6.1100)     | 1 | 0 | 0 | 1 |
| SCCCLR1022B02.g | GS1_SS_02510_05883 | Unknown | others                      | .                       | .                                                                                                                                                                                    | unknown [Zea mays]                                                                                                                                                                                      |  | down (-3.0200,-4.1800) | down (-3.6100,-7.0600) | 0 | 2 | 0 | 2 |
| SCBFSB1045A05.g | GS1_SS_16713_12056 | Unknown | others                      | .                       | .                                                                                                                                                                                    | hypothetical protein OsJ_012928 [Oryza sativa (japonica cultivar-group)]                                                                                                                                |  |                        | down (-1.7600,-4.8000) | 0 | 1 | 0 | 1 |
| SCCCRZ3003E03.g | GS1_SS_15381_08260 | Unknown | others                      | .                       | .                                                                                                                                                                                    | unknown [Zea mays]                                                                                                                                                                                      |  | down (-2.2100,-2.8400) |                        | 0 | 1 | 0 | 1 |
| SCCCAM1001G06.g | GS1_SS_01599_02839 | Unknown | others                      | .                       | .                                                                                                                                                                                    | unknown [Zea mays]                                                                                                                                                                                      |  |                        | down (-3.7600,-4.2700) | 0 | 1 | 0 | 1 |
| SCCCLR1C02C06.g | GS1_SS_01595_19615 | Unknown | others                      | Nucleic acid metabolism | .                                                                                                                                                                                    | DnaJ homologue (At5g06910)                                                                                                                                                                              |  |                        | down (-4.7100,-5.0400) | 0 | 1 | 0 | 1 |
| SCCCRZ2C03B10.g | GS1_SS_10041_10553 | Unknown | others                      | .                       | .                                                                                                                                                                                    | unknown [Zea mays]                                                                                                                                                                                      |  |                        | down (-5.5900,-4.1000) | 0 | 1 | 0 | 1 |
| SCBGLR1114D06.g | GS1_SS_00137_14312 | Unknown | others                      | .                       | .                                                                                                                                                                                    | unknown [Zea mays]                                                                                                                                                                                      |  |                        | down (-4.1500,-2.8700) | 0 | 1 | 0 | 1 |
| SCCCFL1001H12.g | GS1_SS_01299_08633 | Unknown | others                      | .                       | .                                                                                                                                                                                    | unknown [Zea mays]                                                                                                                                                                                      |  | up (2.7200,3.7000)     | up (4.8700,5.4300)     | 2 | 0 | 0 | 2 |
| SCCCFL8C03H05.g | GS1_SS_26254_07396 | Unknown | others                      | .                       | .                                                                                                                                                                                    | hypothetical protein OsJ_018438 [Oryza sativa (japonica cultivar-group)]                                                                                                                                |  | down (-2.9100,-3.4300) |                        | 0 | 1 | 0 | 1 |
| SCAGLR1021G12.g | GS1_SS_19297_07941 | Unknown | others                      | .                       | .                                                                                                                                                                                    | unknown [Zea mays]                                                                                                                                                                                      |  |                        | down (-5.5200,-4.4900) | 0 | 1 | 0 | 1 |
| SCCART1002B11.g | GS1_SS_11712_18967 | Unknown | others                      | Carbohydrate metabolism | (Q40007) Putative 32.7 kDa jasmonate-induced protein                                                                                                                                 | hypothetical protein OsJ_035081 [Oryza sativa (indica cultivar-group)]                                                                                                                                  |  | down (-2.7200,-4.2100) | down (-3.8700,-4.1100) | 0 | 2 | 0 | 2 |
| SCCCLR1072G11.g | GS1_SS_10129_08956 | Unknown | others                      | .                       | .                                                                                                                                                                                    | unknown [Zea mays]                                                                                                                                                                                      |  |                        | down (-5.1100,-5.9900) | 0 | 1 | 0 | 1 |
| SCACLR1126B12.g | GS1_SS_09614_09565 | Unknown | others                      | .                       | .                                                                                                                                                                                    | .                                                                                                                                                                                                       |  | down (-3.6300,-5.1100) | down (-6.0500,-6.6300) | 0 | 2 | 0 | 2 |
| SCCCLR1065C08.g | GS1_SS_10150_13292 | Unknown | others                      | .                       | .                                                                                                                                                                                    | unknown [Zea mays]                                                                                                                                                                                      |  | up (3.4900,4.4000)     |                        | 1 | 0 | 0 | 1 |
| SCACLR1129A10.g | GS1_SS_09637_01035 | Unknown | others                      | .                       | .                                                                                                                                                                                    | unknown [Zea mays]                                                                                                                                                                                      |  |                        | down (-4.5800,-4.5800) | 0 | 1 | 0 | 1 |
| SCAGLR1064F09.g | GS1_SS_09716_00596 | Unknown | others                      | .                       | .                                                                                                                                                                                    | .                                                                                                                                                                                                       |  | down (-3.1000,-3.9700) |                        | 0 | 1 | 0 | 1 |
| SCAGLR2018E01.g | GS1_SS_11377_00526 | Unknown | others                      | .                       | .                                                                                                                                                                                    | unknown [Zea mays]                                                                                                                                                                                      |  |                        | up (3.5400,4.9600)     | 1 | 0 | 0 | 1 |
| SCBGLR1003C06.g | GS1_SS_10718_11560 | Unknown | others                      | .                       | .                                                                                                                                                                                    | unknown [Zea mays]                                                                                                                                                                                      |  |                        | up (4.5200,5.5900)     | 1 | 0 | 0 | 1 |
| SCCCLB1004E03.g | GS1_SS_20718_10339 | Unknown | others                      | .                       | 2,3-cyclic-nucleotide 2-phosphodiesterase                                                                                                                                            | unknown [Zea mays]                                                                                                                                                                                      |  | down (-2.8400,-3.9200) |                        | 0 | 1 | 0 | 1 |
| SCCCCL2001H12.b | GS1_SS_05715_13689 | Unknown | others                      | .                       | .                                                                                                                                                                                    | hypothetical protein OsJ_010070 [Oryza sativa (japonica cultivar-group)]                                                                                                                                |  |                        | up (4.1700,7.0300)     | 1 | 0 | 0 | 1 |
| SCBGLR1082G01.g | GS1_SS_13186_14071 | Unknown | others                      | .                       | .                                                                                                                                                                                    | unknown [Zea mays]                                                                                                                                                                                      |  | down (-2.9900,-7.3600) | down (-5.6400,-8.5000) | 0 | 2 | 0 | 2 |
| SCBGFL5079D09.g | GS1_SS_13196_07823 | Unknown | others                      | .                       | .                                                                                                                                                                                    | unknown [Zea mays]                                                                                                                                                                                      |  | up (1.8300,2.7200)     |                        | 1 | 0 | 0 | 1 |
| SCACST3160H08.g | GS1_SS_01439_02319 | Unknown | others                      | .                       | .                                                                                                                                                                                    | .                                                                                                                                                                                                       |  | down (-3.7300,-5.5700) |                        | 0 | 1 | 0 | 1 |
| SCAGAM2125E03.g | GS1_SS_03760_10041 | Unknown | others                      | .                       | .                                                                                                                                                                                    | hypothetical protein OsJ_024392 [Oryza sativa (indica cultivar-group)]                                                                                                                                  |  |                        | down (-5.2200,-5.4600) | 0 | 1 | 0 | 1 |
| SCCCAM1073A05.g | GS1_SS_01858_07474 | Unknown | others                      | .                       | .                                                                                                                                                                                    | unknown [Zea mays]                                                                                                                                                                                      |  |                        | down (-3.6000,-4.5700) | 0 | 1 | 0 | 1 |
| SCCCST2004E05.g | GS1_SS_17839_02986 | Unknown | oxidoreductase              | .                       | Probable flavin-containing monooxygenase 1                                                                                                                                           | unknown [Zea mays]                                                                                                                                                                                      |  | down (-2.3600,-4.2300) | down (-4.8500,-4.9300) | 0 | 2 | 0 | 2 |
| SCVPLB1018G04.g | GS1_SS_09546_13291 | Unknown | oxidoreductase              | .                       | Electron transfer flavoprotein-ubiquinone oxidoreductase, mitochondrial; ETF-ubiquinone oxidoreductase; ETF-QO; Electron-transferring-flavoprotein dehydrogenase; ETF dehydrogenase; | Electron transfer flavoprotein-ubiquinone oxidoreductase, mitochondrial precursor, putative, expressed [Oryza sativa (japonica cultivar-group)]                                                         |  | up (1.9500,2.5700)     | up (3.6900,3.7200)     | 2 | 0 | 0 | 2 |
| SCQSLR1018A06.g | GS1_SS_10920_08940 | Unknown | protease                    | .                       | Mitochondrial inner membrane protease ATP23                                                                                                                                          | unknown [Zea mays]                                                                                                                                                                                      |  | down (-2.3700,-3.1700) |                        | 0 | 1 | 0 | 1 |
| SCEPLB1043F06.g | GS1_SS_18547_10976 | Unknown | protease                    | .                       | Aspartic proteinase nepenthesin-2; Nepenthesin-II;                                                                                                                                   | hypothetical protein OsJ_018716 [Oryza sativa (japonica cultivar-group)]                                                                                                                                |  | up (6.7300,3.4600)     | up (3.8300,6.9100)     | 2 | 0 | 0 | 2 |
| SCMCAM1100B05.g | GS1_SS_20511_10943 | Unknown | protein-protein interaction | .                       | Nodulation receptor kinase;                                                                                                                                                          | Os01g0140400 [Oryza sativa (japonica cultivar-group)] senescence-induced receptor-like serine/threonine kinase-like [Oryza sativa Japonica Group] Os01g0140400 [Oryza sativa (japonica cultivar-group)] |  |                        | down (-3.7100,-4.4200) | 0 | 1 | 0 | 1 |

|                 |                    |         |                     |                                             |                                                                                                                                                                                                                        |                                                                                                                                                                                                                                                            |                        |                        |                        |   |   |   |   |
|-----------------|--------------------|---------|---------------------|---------------------------------------------|------------------------------------------------------------------------------------------------------------------------------------------------------------------------------------------------------------------------|------------------------------------------------------------------------------------------------------------------------------------------------------------------------------------------------------------------------------------------------------------|------------------------|------------------------|------------------------|---|---|---|---|
| SCVPRT2081D11.g | GS1_SS_18735_01249 | Unknown | Reductase           | .                                           | Flavoprotein wrbA (Trp repressor binding protein)                                                                                                                                                                      | Os05g0501300 [Oryza sativa (japonica cultivar-group)] putative 1,4-benzoquinone reductase [Oryza sativa (japonica cultivar-group)] Os05g0501300 [Oryza sativa (japonica cultivar-group)] hypothetical protein Osl_019826 [Oryza sativa (indica cultivar-   | down (-1.4400,-2.6200) |                        | 0                      | 1 | 0 | 1 |   |
| SCJLRZ1021F11.g | GS1_SS_02406_12748 | Unknown | ribosomal protein   | .                                           | 50S ribosomal protein L18, chloroplastic; CL18;                                                                                                                                                                        | unknown [Zea mays]                                                                                                                                                                                                                                         |                        | down (-4.0200,-4.6900) | down (-5.4800,-5.5300) | 0 | 2 | 0 | 2 |
| SCEZHR1049C07.g | GS1_SS_07647_21820 | Unknown | Ribosomal protein   | Stress                                      | Water stress                                                                                                                                                                                                           | repressed                                                                                                                                                                                                                                                  |                        | down (-2.4300,-3.1200) | down (-4.4100,-4.8100) | 0 | 2 | 0 | 2 |
| SCRLRZ3039A08.g | GS1_SS_15820_19419 | Unknown | RNA-binding protein | Stress                                      | Water stress                                                                                                                                                                                                           | induced                                                                                                                                                                                                                                                    |                        | down (-3.0100,-2.6400) |                        | 0 | 1 | 0 | 1 |
| SCCCST1002H06.g | GS1_SS_15854_18993 | Unknown | synthase            | Secondary metabolism                        | flavonol synthase                                                                                                                                                                                                      | unknown [Zea mays]                                                                                                                                                                                                                                         | down (-1.2300,-2.0000) |                        |                        | 0 | 1 | 0 | 1 |
| SCEPRT2047F02.g | GS1_SS_12953_15288 | Unknown | synthase            | Lipid, fatty-acid and isoprenoid metabolism | Phytoene synthase 2, chloroplast precursor (EC 2.5.1.-)                                                                                                                                                                | phytoene synthase 2 [Zea mays]                                                                                                                                                                                                                             |                        |                        | down (-5.1100,-5.7300) | 0 | 1 | 0 | 1 |
| SCJLRZ1027E04.g | GS1_SS_12905_02854 | Unknown | Transferase family  | .                                           | Sulfotransferase 18; AtSOT18; Desulfoglucosinolate sulfotransferase B; AtST5b                                                                                                                                          | unknown [Zea mays]                                                                                                                                                                                                                                         |                        | down (-6.2400,-5.9700) | down (-5.4800,-6.3300) | 0 | 2 | 0 | 2 |
| SCJFRZ3C04A07.g | GS1_AS_15809_15643 | Unknown | transporter         | Protein metabolism                          | GDP-mannose transporter                                                                                                                                                                                                | GONST2 Golgi Nucleotide sugar transporter, putative [Oryza sativa (japonica cultivar-group)] hypothetical protein Osl_012615 [Oryza sativa (japonica cultivar-group)]                                                                                      |                        |                        | down (-4.2000,-5.2500) | 0 | 1 | 0 | 1 |
| SCCCST2002A02.g | GS1_SS_18309_11412 | Unknown | transporter         | .                                           | Uncharacterized membrane protein At1g63010                                                                                                                                                                             | SPX (SYG1/Pho81/XPR1) domain-containing protein-like [Oryza sativa Japonica Group] SPX (SYG1/Pho81/XPR1) domain-containing protein-like [Oryza sativa Japonica Group]                                                                                      | down (-1.4400,-2.8300) |                        |                        | 0 | 1 | 0 | 1 |
| SCSFAM1076F04.g | GS1_SS_03238_02452 | Unknown | transporter         | .                                           | Probable potassium transporter 16; OsHAK16                                                                                                                                                                             | hypothetical protein Osl_011049 [Oryza sativa (japonica cultivar-group)]                                                                                                                                                                                   |                        |                        | down (-3.3000,-4.3500) | 0 | 1 | 0 | 1 |
| SCJLRT1016A01.g | GS1_SS_12474_06120 | Unknown | ubiquitination      | .                                           | Autophagy-related protein 7; Autophagy-related E1-like-activating enzyme ATG7; ATG12-activating E2-like enzyme; Protein autophagy APG7; AtAPG7                                                                         | hypothetical protein Osl_002807 [Oryza sativa (indica cultivar-group)]                                                                                                                                                                                     |                        |                        | up (3.9000,4.0200)     | 1 | 0 | 0 | 1 |
| SCEZAD1C01D10.g | GS1_SS_00508_12015 | Unknown | Uncharacterized     | .                                           | .                                                                                                                                                                                                                      | .                                                                                                                                                                                                                                                          |                        |                        | up (4.1600,6.9400)     | 1 | 0 | 0 | 1 |
| SCEPAM1019B10.g | GS1_SS_01941_08126 | Unknown | uncharacterized     | .                                           | DnaJ homolog subfamily C member 2; Zuotin-related factor 1; Mouse Id associate 1; MIDA1                                                                                                                                | hypothetical protein Osl_008455 [Oryza sativa (indica cultivar-group)]                                                                                                                                                                                     | down (-3.3000,-5.3200) |                        |                        | 0 | 1 | 0 | 1 |
| SCQGAM2028B12.g | GS1_SS_16315_13266 | Unknown | uncharacterized     | .                                           | .                                                                                                                                                                                                                      | Os01g0194000 [Oryza sativa (japonica cultivar-group)] Os01g0194000 [Oryza sativa (japonica cultivar-group)]                                                                                                                                                |                        | down (-2.0100,-4.0600) |                        | 0 | 1 | 0 | 1 |
| SCSFAD1069H10.g | GS1_SS_01211_13210 | Unknown | uncharacterized     | .                                           | .                                                                                                                                                                                                                      | unknown [Zea mays]                                                                                                                                                                                                                                         |                        | down (-3.7200,-2.7700) | down (-4.7400,-4.3400) | 0 | 2 | 0 | 2 |
| SCSFSB1105C04.g | GS1_SS_26164_00448 | Unknown | Uncharacterized     | .                                           | .                                                                                                                                                                                                                      | unknown [Zea mays] unknown [Zea mays]                                                                                                                                                                                                                      |                        | up (3.0300,2.8300)     |                        | 1 | 0 | 0 | 1 |
| SCQSRT1034D09.g | GS1_SS_12729_12754 | Unknown | Uncharacterized     | .                                           | Sodium-coupled neutral amino acid transporter 1; Amino acid transporter A1; System A amino acid transporter 1; System N amino acid transporter 1; N-system amino acid transporter 2; Solute carrier family 38 member 1 | Os02g0191300 [Oryza sativa (japonica cultivar-group)] putative amino acid transporter A1 [Oryza sativa Japonica Group] putative amino acid transporter A1 [Oryza sativa Japonica Group] Os02g0191300 [Oryza sativa (japonica cultivar-group)] hypothetical |                        |                        | up (5.5100,5.6100)     | 1 | 0 | 0 | 1 |
| SCEPAM1020B08.g | GS1_SS_01956_02298 | Unknown | uncharacterized     | .                                           | Probable 125 kDa kinesin-related protein                                                                                                                                                                               | kinesin heavy chain [Zea mays]                                                                                                                                                                                                                             |                        | down (-3.0000,-4.2300) |                        | 0 | 1 | 0 | 1 |
| SCJFRZ2027A05.g | GS1_SS_11557_08583 | Unknown | Uncharacterized     | .                                           | .                                                                                                                                                                                                                      | unknown [Zea mays]                                                                                                                                                                                                                                         |                        | down (-3.3100,-3.5100) | down (-4.3900,-5.7500) | 0 | 2 | 0 | 2 |
| SCUTLR2023A03.g | GS1_SS_04374_14495 | Unknown | Uncharacterized     | .                                           | Esterase precursor (Early nodule-specific protein homolog) (Latex allergen Hev b 13)                                                                                                                                   | unknown [Zea mays]                                                                                                                                                                                                                                         |                        | down (-3.2700,-4.2200) |                        | 0 | 1 | 0 | 1 |
| SCVPRZ3029F03.g | GS1_SS_00314_13853 | Unknown | Uncharacterized     | .                                           | .                                                                                                                                                                                                                      | unknown [Zea mays]                                                                                                                                                                                                                                         |                        | down (-6.7200,-6.8700) | down (-6.8600,-8.2300) | 0 | 2 | 0 | 2 |
| SCRLRZ3114C04.g | GS1_SS_16282_12967 | Unknown | uncharacterized     | .                                           | .                                                                                                                                                                                                                      | unknown [Zea mays]                                                                                                                                                                                                                                         | down (-1.1000,-1.7700) |                        |                        | 0 | 1 | 0 | 1 |

|                 |                    |         |                 |                         |                                                                                             |                                                                                                                                                                                                                      |                        |                        |   |   |   |   |
|-----------------|--------------------|---------|-----------------|-------------------------|---------------------------------------------------------------------------------------------|----------------------------------------------------------------------------------------------------------------------------------------------------------------------------------------------------------------------|------------------------|------------------------|---|---|---|---|
| SCJLLR1033A12.g | GS1_AS_01627_05729 | Unknown | Uncharacterized | .                       | Transmembrane protein 147                                                                   | Os03g0766000 [Oryza sativa (japonica cultivar-group)]<br>Os03g0766000 [Oryza sativa (japonica cultivar-group)]                                                                                                       |                        | down (-4.5400,-4.6200) | 0 | 1 | 0 | 1 |
| SCMCAM2082H05.g | GS1_SS_02418_07359 | Unknown | Uncharacterized | .                       | .                                                                                           | unknown [Zea mays]                                                                                                                                                                                                   |                        | up (4.5400,3.6600)     | 1 | 0 | 0 | 1 |
| SCSBSD2029B08.g | GS1_SS_25484_04225 | Unknown | uncharacterized | .                       | .                                                                                           | .                                                                                                                                                                                                                    |                        | up (3.3400,3.1800)     | 1 | 0 | 0 | 1 |
| SCCST3005G09.g  | GS1_SS_18360_05918 | Unknown | Uncharacterized | .                       | .                                                                                           | unknown [Zea mays]                                                                                                                                                                                                   |                        | down (-2.7500,-4.2000) | 0 | 1 | 0 | 1 |
| SCVPRT2073H08.g | GS1_SS_14056_12468 | Unknown | Uncharacterized | .                       | .                                                                                           | Os10g0559400 [Oryza sativa (japonica cultivar-group)]<br>retrotransposon protein, putative, unclassified, expressed [Oryza sativa (japonica cultivar-group)] Os10g0559400 [Oryza sativa (japonica cultivar-group)]   |                        | up (2.9200,5.4300)     | 1 | 0 | 0 | 1 |
| SCVPRZ3030G09.g | GS1_SS_22543_20618 | Unknown | uncharacterized | Stress                  | Water stress                                                                                | induced                                                                                                                                                                                                              |                        | up (4.6800,3.8300)     | 2 | 0 | 0 | 2 |
| SCEQAD1018E12.g | GS1_SS_00479_12977 | Unknown | uncharacterized | .                       | .                                                                                           | .                                                                                                                                                                                                                    |                        | up (2.9400,3.3000)     | 1 | 0 | 0 | 1 |
| SCSBSD2030A01.g | GS1_SS_25489_01178 | Unknown | Uncharacterized | .                       | Glutelin type-B 5 precursor [Glutelin type-B 5 acidic chain; Glutelin type-B 5 basic chain] | legumin 1 [Zea mays] unknown [Zea mays]                                                                                                                                                                              |                        | down (-3.1900,-3.0700) | 0 | 2 | 0 | 2 |
| SCCCLR1070H01.g | GS1_SS_10230_06550 | Unknown | uncharacterized | .                       | .                                                                                           | unknown [Zea mays]                                                                                                                                                                                                   |                        | down (-3.0400,-3.5400) | 0 | 1 | 0 | 1 |
| SCEZLB1005B03.g | GS1_SS_02909_02112 | Unknown | Uncharacterized | .                       | Nucleolar complex protein 2 homolog; Protein NOC2 homolog                                   | Os12g0163200 [Oryza sativa (japonica cultivar-group)]<br>Uncharacterised protein family containing protein, expressed [Oryza sativa (japonica cultivar-group)] Os12g0163200 [Oryza sativa (japonica cultivar-group)] |                        | down (-2.0300,-3.5200) | 0 | 1 | 0 | 1 |
| SCVPLR2012A07.g | GS1_SS_12036_12107 | Unknown | Uncharacterized | .                       | .                                                                                           | Os04g0564700 [Oryza sativa (japonica cultivar-group)]<br>Os04g0564700 [Oryza sativa (japonica cultivar-group)]                                                                                                       |                        | up (2.0500,3.8800)     | 1 | 0 | 0 | 1 |
| SCJFRZ2025E01.g | GS1_AS_16600_21831 | Unknown | uncharacterized | Unknown protein         | .                                                                                           | .                                                                                                                                                                                                                    |                        | up (4.8200,5.2800)     | 1 | 0 | 0 | 1 |
| SCUTST3087E03.g | GS1_SS_18963_10075 | Unknown | uncharacterized | .                       | .                                                                                           | hypothetical protein Osl_018089 [Oryza sativa (indica cultivar-group)]                                                                                                                                               |                        | up (2.5500,4.8300)     | 1 | 0 | 0 | 1 |
| SCSBSD1058E10.g | GS1_SS_41919_16256 | Unknown | uncharacterized | Receptors               | Receptor Ser/Thr kinase-unclassified                                                        | caneURLK-120 (with LRR)                                                                                                                                                                                              |                        | down (-2.8800,-3.6500) | 0 | 1 | 0 | 1 |
| SCRFST1041H05.g | GS1_SS_05103_03622 | Unknown | uncharacterized | .                       | .                                                                                           | unknown [Zea mays]                                                                                                                                                                                                   |                        | down (-3.1500,-3.0600) | 0 | 1 | 0 | 1 |
| SCBFST3133G05.g | GS1_SS_18453_03878 | Unknown | uncharacterized | .                       | .                                                                                           | unknown [Zea mays]                                                                                                                                                                                                   |                        | down (-3.2900,-6.7200) | 0 | 1 | 0 | 1 |
| SCRLLR1038F07.g | GS1_SS_12299_12089 | Unknown | uncharacterized | .                       | .                                                                                           | unknown [Zea mays]                                                                                                                                                                                                   | down (-1.1700,-1.2800) |                        | 0 | 1 | 0 | 1 |
| SCQGL4079D05.g  | GS1_SS_14500_13207 | Unknown | Uncharacterized | .                       | .                                                                                           | Os01g0120500 [Oryza sativa (japonica cultivar-group)]<br>unknown protein [Oryza sativa Japonica Group] unknown protein [Oryza sativa Japonica Group] Os01g0120500 [Oryza sativa (japonica cultivar-group)]           |                        | down (-2.9400,-2.8800) | 0 | 1 | 0 | 1 |
| SCAGRT2039D11.g | GS1_SS_12834_13883 | Unknown | Uncharacterized | .                       | .                                                                                           | hypothetical protein SORBIDRAFT_10g006790 [Sorghum bicolor] hypothetical protein SORBIDRAFT_10g006790 [Sorghum bicolor]                                                                                              |                        | up (2.8300,2.9000)     | 1 | 0 | 0 | 1 |
| SCJFRZ2006C07.g | GS1_SS_05098_11319 | Unknown | uncharacterized | .                       | .                                                                                           | unknown [Zea mays]                                                                                                                                                                                                   |                        | down (-2.4400,-7.2100) | 0 | 1 | 0 | 1 |
| SCMCRZ3065E11.g | GS1_SS_00834_11349 | Unknown | Uncharacterized | .                       | .                                                                                           | hypothetical protein Osl_028750 [Oryza sativa (japonica cultivar-group)]                                                                                                                                             |                        | down (-4.0400,-4.1200) | 0 | 1 | 0 | 1 |
| SCBFRZ2048B09.g | GS1_SS_18430_09463 | Unknown | Uncharacterized | .                       | DUF246 domain-containing protein At1g04910                                                  | unknown [Zea mays]                                                                                                                                                                                                   |                        | down (-3.4400,-3.7200) | 0 | 1 | 0 | 1 |
| SCEQLB1067F01.g | GS1_SS_12045_19144 | Unknown | uncharacterized | Carbohydrate metabolism | vegetative storage protein                                                                  | provA;vel relA;Ae com ferimentos e assimilação de nitrogênio                                                                                                                                                         |                        | down (-3.6900,-7.0800) | 0 | 1 | 0 | 1 |
| SCJLRZ1020H11.g | GS1_SS_14486_01492 | Unknown | uncharacterized | .                       | .                                                                                           | hypothetical protein Osl_030943 [Oryza sativa (japonica cultivar-group)]                                                                                                                                             |                        | down (-2.6300,-4.4900) | 0 | 1 | 0 | 1 |

|                 |                    |         |                 |            |   |                                                                                                                                                                                                                                                            |                                                                        |                        |                        |   |   |   |   |
|-----------------|--------------------|---------|-----------------|------------|---|------------------------------------------------------------------------------------------------------------------------------------------------------------------------------------------------------------------------------------------------------------|------------------------------------------------------------------------|------------------------|------------------------|---|---|---|---|
| SCJFRT2060A01.g | GS1_SS_13426_13153 | Unknown | Uncharacterized | .          | . | Os06g0235200 [Oryza sativa (japonica cultivar-group)] leaf senescence protein-like [Oryza sativa Japonica Group] leaf senescence protein-like [Oryza sativa Japonica Group] Os06g0235200 [Oryza sativa (japonica cultivar-group)] hypothetical protein Osl | down (-3.7000,-5.0800)                                                 | down (-5.0000,-5.6600) | 0                      | 2 | 0 | 2 |   |
| SCEPAM1018G02.g | GS1_SS_18912_05375 | Unknown | uncharacterized | .          | . | hypothetical protein Osl_010041 [Oryza sativa (japonica cultivar-group)]                                                                                                                                                                                   | down (-4.1200,-6.1500)                                                 | down (-4.1700,-6.2200) | 0                      | 2 | 0 | 2 |   |
| SCMCRT2085F06.g | GS1_SS_08580_00148 | Unknown | uncharacterized | .          | . | unknown [Zea mays]                                                                                                                                                                                                                                         |                                                                        | down (-5.0100,-4.3600) | 0                      | 1 | 0 | 1 |   |
| SCJLLR1101D08.g | GS1_SS_10629_00361 | Unknown | uncharacterized | .          | . | unknown [Zea mays]                                                                                                                                                                                                                                         |                                                                        | down (-3.1900,-5.9900) | 0                      | 1 | 0 | 1 |   |
| SCACAD1039H11.g | GS1_SS_00187_09901 | Unknown | Uncharacterized | .          | . | Uncharacterized protein At1g14870                                                                                                                                                                                                                          | unknown [Zea mays]                                                     |                        | down (-3.8700,-4.4700) | 0 | 1 | 0 | 1 |
| SCRFLB1053C11.g | GS1_SS_18012_14443 | Unknown | Uncharacterized | .          | . | SWI/SNF complex subunit SWI3D; AtSWI3D; Transcription regulatory protein SWI3D                                                                                                                                                                             | unknown [Zea mays]                                                     | down (-2.5300,-4.7600) | 0                      | 1 | 0 | 1 |   |
| SCMCRT2087B07.g | GS1_SS_13555_17889 | Unknown | Uncharacterized | Receptors  | . | receptor Ser/Thr kinase caneRLK-DVI4 (LRR)                                                                                                                                                                                                                 | down (-2.0900,-3.7300)                                                 |                        | 0                      | 1 | 0 | 1 |   |
| SCMCRT2087A05.g | GS1_SS_13553_01236 | Unknown | Uncharacterized | .          | . | unknown [Zea mays]                                                                                                                                                                                                                                         |                                                                        | up (4.3800,4.2800)     | 1                      | 0 | 0 | 1 |   |
| SCSGHR1070F11.g | GS1_SS_08598_06625 | Unknown | Uncharacterized | .          | . | unknown [Zea mays]                                                                                                                                                                                                                                         | down (-3.1800,-3.2300)                                                 |                        | 0                      | 1 | 0 | 1 |   |
| SCSGLR1045B04.g | GS1_SS_09893_02559 | Unknown | Uncharacterized | .          | . | unknown [Zea mays]                                                                                                                                                                                                                                         | down (-4.2300,-5.8400)                                                 | down (-7.1200,-6.8100) | 0                      | 2 | 0 | 2 |   |
| SCBGLR1118F01.g | GS1_SS_09897_12713 | Unknown | Uncharacterized | .          | . | Os10g0503600 [Oryza sativa (japonica cultivar-group)] putative senescence-associated protein [Oryza sativa (japonica cultivar-group)] senescence-associated family protein, putative, expressed [Oryza sativa (japonica cultivar-group)] Os10g0503600 [Ory |                                                                        | down (-2.9500,-3.1400) | 0                      | 1 | 0 | 1 |   |
| SCVPLR1049E07.g | GS1_SS_11214_00800 | Unknown | uncharacterized | .          | . | hypothetical protein Osl_011924 [Oryza sativa (japonica cultivar-group)]                                                                                                                                                                                   | up (2.8500,2.9700)                                                     |                        | 1                      | 0 | 0 | 1 |   |
| SCEPAM2056G08.g | GS1_SS_16429_09681 | Unknown | Uncharacterized | .          | . | Uncharacterized transporter YBR287W                                                                                                                                                                                                                        | unknown [Zea mays]                                                     | up (4.9400,2.6800)     | 1                      | 0 | 0 | 1 |   |
| SCSBSD1056F06.g | GS1_SS_25729_14516 | Unknown | uncharacterized | .          | . | .                                                                                                                                                                                                                                                          |                                                                        | down (-3.4300,-3.6000) | 0                      | 1 | 0 | 1 |   |
| SCUTLR1037C05.g | GS1_SS_11172_07917 | Unknown | uncharacterized | .          | . | Nectarin-1; Superoxide dismutase [Mn];                                                                                                                                                                                                                     | germin-like protein 6a [Hordeum vulgare subsp. vulgare]                | down (-4.5800,-6.0300) | 0                      | 1 | 0 | 1 |   |
| SCEZRZ1017F11.g | GS1_SS_09859_02722 | Unknown | Uncharacterized | .          | . | unknown [Zea mays]                                                                                                                                                                                                                                         | down (-1.9700,-3.0100)                                                 |                        | 0                      | 1 | 0 | 1 |   |
| SCUTLR1037G04.g | GS1_SS_11178_12825 | Unknown | uncharacterized | .          | . | .                                                                                                                                                                                                                                                          |                                                                        | up (3.2200,4.5700)     | 2                      | 0 | 0 | 2 |   |
| SCEQSB1C02G10.g | GS1_SS_19403_14533 | Unknown | uncharacterized | .          | . | Uncharacterized membrane protein At1g63010                                                                                                                                                                                                                 | hypothetical protein LOC100193704 [Zea mays]                           | up (3.2500,3.3900)     | 1                      | 0 | 0 | 1 |   |
| SCCCLR1C09A04.g | GS1_SS_09943_11731 | Unknown | Uncharacterized | .          | . | .                                                                                                                                                                                                                                                          |                                                                        | down (-2.5700,-3.3700) | 0                      | 1 | 0 | 1 |   |
| SCACLB1045B09.g | GS1_SS_08860_12706 | Unknown | Uncharacterized | .          | . | F-box/WD repeat-containing protein pof10; Skp1-binding protein 2                                                                                                                                                                                           | unknown [Zea mays]                                                     | up (2.3300,2.6000)     | 1                      | 0 | 0 | 1 |   |
| SCJFRZ2013G01.g | GS1_SS_14876_01578 | Unknown | uncharacterized | .          | . | unknown [Zea mays]                                                                                                                                                                                                                                         | down (-3.4100,-2.8900)                                                 |                        | 0                      | 1 | 0 | 1 |   |
| SCBGFL4056D06.g | GS1_SS_22045_14342 | Unknown | Uncharacterized | .          | . | Probable E3 ubiquitin-protein ligase HERC1; HECT domain and RCC1-like domain-containing protein 1; p532; p619                                                                                                                                              | unknown [Zea mays]                                                     |                        | down (-3.5400,-5.0500) | 0 | 1 | 0 | 1 |
| SCSGLV1006E08.g | GS1_SS_26109_08722 | Unknown | Uncharacterized | .          | . | Os01g0138400 [Oryza sativa (japonica cultivar-group)] putative receptor serine/threonine kinase PR5K [Oryza sativa Japonica Group] Os01g0138400 [Oryza sativa (japonica cultivar-group)] stress-induced receptor-like kinase 2 [Oryza sativa (indica culti |                                                                        | up (7.4200,3.9000)     | 1                      | 0 | 0 | 1 |   |
| SCEQLR1050B01.g | GS1_SS_10359_08785 | Unknown | uncharacterized | .          | . | unknown [Zea mays]                                                                                                                                                                                                                                         |                                                                        | up (3.0000,3.4700)     | 1                      | 0 | 0 | 1 |   |
| SCSBAD1053B05.g | GS1_SS_01146_09019 | Unknown | Uncharacterized | Cell cycle | . | Protein bimA                                                                                                                                                                                                                                               | unknown [Zea mays]                                                     | up (2.8700,3.5100)     | 1                      | 0 | 0 | 1 |   |
| SCJLST1024H09.g | GS1_SS_17586_12600 | Unknown | Uncharacterized | .          | . | Cysteine-rich repeat secretory protein 12;                                                                                                                                                                                                                 | hypothetical protein Osl_021616 [Oryza sativa (indica cultivar-group)] | down (-4.1300,-5.2900) | 0                      | 1 | 0 | 1 |   |
| SCJFST1048C08.g | GS1_SS_16005_09886 | Unknown | uncharacterized | .          | . | unknown [Zea mays]                                                                                                                                                                                                                                         |                                                                        | down (-5.8200,-5.2200) | 0                      | 1 | 0 | 1 |   |
| SCJFRT2060A10.g | GS1_SS_12427_17238 | Unknown | Uncharacterized | No matches | . | unknown [Zea mays]                                                                                                                                                                                                                                         |                                                                        | up (5.5600,6.0500)     | 1                      | 0 | 0 | 1 |   |
| SCVPRT2078D10.g | GS1_SS_14106_09883 | Unknown | uncharacterized | .          | . | .                                                                                                                                                                                                                                                          |                                                                        | up (3.5800,5.5200)     | 1                      | 0 | 0 | 1 |   |

|                 |                    |         |                 |            |   |                                                                                                                                                                                                                                                           |                        |                        |   |   |   |   |
|-----------------|--------------------|---------|-----------------|------------|---|-----------------------------------------------------------------------------------------------------------------------------------------------------------------------------------------------------------------------------------------------------------|------------------------|------------------------|---|---|---|---|
| SCACLB1046G06.g | GS1_SS_08878_11602 | Unknown | Uncharacterized | .          | . | hypothetical protein Osl_024565 [Oryza sativa (indica cultivar-group)] hypothetical protein Osl_022720 [Oryza sativa (japonica cultivar-group)]                                                                                                           |                        | up (2.7000,3.4800)     | 1 | 0 | 0 | 1 |
| SCJLRZ3076G11.g | GS1_SS_15994_12790 | Unknown | Uncharacterized | .          | . | hypothetical protein Osl_032609 [Oryza sativa (japonica cultivar-group)]                                                                                                                                                                                  |                        | up (2.8600,3.8800)     | 1 | 0 | 0 | 1 |
| SCEPLR1008G07.g | GS1_SS_10294_13665 | Unknown | Uncharacterized | .          | . |                                                                                                                                                                                                                                                           |                        | up (3.8600,3.0100)     | 2 | 0 | 0 | 2 |
| SCQSLF1121B01.g | GS1_AS_24042_14863 | Unknown | Uncharacterized | No matches | . |                                                                                                                                                                                                                                                           |                        | up (2.5600,3.4200)     | 1 | 0 | 0 | 1 |
| SCSGLV1008B03.g | GS1_SS_26120_13402 | Unknown | uncharacterized | .          | . | unknown [Zea mays]                                                                                                                                                                                                                                        |                        | up (5.4600,5.2200)     | 1 | 0 | 0 | 1 |
| SCRLLR1059C02.g | GS1_SS_14164_13949 | Unknown | Uncharacterized | .          | . | unknown [Zea mays]                                                                                                                                                                                                                                        |                        | up (4.7400,5.0200)     | 2 | 0 | 0 | 2 |
| SCCCCL4007A12.g | GS1_SS_19395_03758 | Unknown | Uncharacterized | .          | . | hypothetical protein Osl_009337 [Oryza sativa (indica cultivar-group)]                                                                                                                                                                                    |                        | up (2.7600,3.1200)     | 1 | 0 | 0 | 1 |
| SCJLLR1107C08.g | GS1_SS_13249_09692 | Unknown | Uncharacterized | .          | . | Probable carbohydrate esterase At4g34215                                                                                                                                                                                                                  | unknown [Zea mays]     | down (-2.5900,-3.8500) | 0 | 1 | 0 | 1 |
| SCCCLR1048A03.g | GS1_SS_15979_14228 | Unknown | Uncharacterized | .          | . | IgA FC receptor; Beta antigen; B antigen;                                                                                                                                                                                                                 | unknown [Zea mays]     | up (7.4000,5.1900)     | 1 | 0 | 0 | 1 |
| SCUTLR2008H10.g | GS1_AS_09610_06204 | Unknown | uncharacterized | .          | . | Uncharacterized GPI-anchored protein At3g06035;                                                                                                                                                                                                           | unknown [Zea mays]     | up (3.4400,4.5100)     | 1 | 0 | 0 | 1 |
| SCEQLB1068G06.g | GS1_SS_19385_08576 | Unknown | Uncharacterized | .          | . | unknown [Zea mays]                                                                                                                                                                                                                                        |                        | down (-3.6900,-3.7500) | 0 | 1 | 0 | 1 |
| SCSBFL1039G06.g | GS1_AS_20092_00178 | Unknown | uncharacterized | .          | . | hypothetical protein [Oryza sativa Japonica Group] hypothetical protein [Oryza sativa Japonica Group]                                                                                                                                                     |                        | up (2.2500,3.3500)     | 1 | 0 | 0 | 1 |
| SCSGFL4C04A05.g | GS1_SS_21899_01687 | Unknown | Uncharacterized | .          | . | hypothetical protein Osl_016534 [Oryza sativa (japonica cultivar-group)]                                                                                                                                                                                  |                        | down (-3.9300,-3.0400) | 0 | 1 | 0 | 1 |
| SCQSLR1089H10.g | GS1_SS_15896_10232 | Unknown | uncharacterized | .          | . | unknown [Zea mays]                                                                                                                                                                                                                                        | down (-2.8000,-1.8800) |                        | 0 | 1 | 0 | 1 |
| SCVPCL6044A06.g | GS1_SS_07071_11868 | Unknown | Uncharacterized | .          | . |                                                                                                                                                                                                                                                           |                        | up (3.4900,3.5500)     | 1 | 0 | 0 | 1 |
| SCJFLR1035F07.g | GS1_SS_07081_09349 | Unknown | Uncharacterized | .          | . | Os01g0104800 [Oryza sativa (japonica cultivar-group)] unknown protein [Oryza sativa Japonica Group] unknown protein [Oryza sativa Japonica Group] Os01g0104800 [Oryza sativa (japonica cultivar-group)]                                                   |                        | down (-3.0400,-3.6000) | 0 | 1 | 0 | 1 |
| SCEQSB1C03A07.g | GS1_SS_17381_14275 | Unknown | Uncharacterized | .          | . | Something about silencing protein 10; Disrupter of silencing SAS10; UTP3 homolog; Charged amino acid-rich leucine zipper 1; CRL1                                                                                                                          | unknown [Zea mays]     |                        | 1 | 0 | 0 | 1 |
| SCQSAM2100G02.g | GS1_SS_08780_09807 | Unknown | uncharacterized | .          | . |                                                                                                                                                                                                                                                           | unknown [Zea mays]     | up (5.8100,6.2700)     | 1 | 0 | 0 | 1 |
| SCVPCL6045C01.g | GS1_SS_07084_00155 | Unknown | uncharacterized | .          | . | putative retroelement protein [Sorghum bicolor]                                                                                                                                                                                                           |                        | up (5.2600,5.3700)     | 1 | 0 | 0 | 1 |
| SCRFAM1026C04.g | GS1_SS_17369_05686 | Unknown | Uncharacterized | .          | . | unknown [Zea mays]                                                                                                                                                                                                                                        |                        | up (2.8800,3.8800)     | 1 | 0 | 0 | 1 |
| SCSBAM1088A01.g | GS1_SS_03195_08289 | Unknown | uncharacterized | .          | . | Os09g0469900 [Oryza sativa (japonica cultivar-group)] putative queuine tRNA-ribosyltransferase [Oryza sativa Japonica Group] putative queuine tRNA-ribosyltransferase [Oryza sativa Japonica Group] Os09g0469900 [Oryza sativa (japonica cultivar-group)] |                        | down (-2.8700,-3.0900) | 0 | 1 | 0 | 1 |
| SCVPRZ2037E03.g | GS1_AS_15121_03483 | Unknown | Uncharacterized | .          | . |                                                                                                                                                                                                                                                           |                        | down (-4.0400,-4.1500) | 0 | 1 | 0 | 1 |
| SCMCST1052G03.g | GS1_SS_17900_05313 | Unknown | Uncharacterized | .          | . | hypothetical protein LOC100192523 [Zea mays] unknown [Zea mays]                                                                                                                                                                                           |                        | down (-2.2600,-3.1600) | 0 | 1 | 0 | 1 |
| SCSGFL4031B05.g | GS1_SS_21854_14453 | Unknown | uncharacterized | .          | . | hypothetical protein Osl_019840 [Oryza sativa (indica cultivar-group)]                                                                                                                                                                                    |                        | down (-4.2900,-4.8100) | 0 | 1 | 0 | 1 |
| SCCCRZ3004E12.g | GS1_SS_15226_09240 | Unknown | Uncharacterized | .          | . | PsbP-like protein 1, chloroplastic; PsbP-related thylakoid lumenal protein 2; OEC23-like protein 4;                                                                                                                                                       | unknown [Zea mays]     | down (-3.7100,-4.8800) | 0 | 1 | 0 | 1 |
| SCVPAM2065F07.g | GS1_SS_05589_14055 | Unknown | Uncharacterized | .          | . |                                                                                                                                                                                                                                                           |                        | up (3.3300,4.1400)     | 1 | 0 | 0 | 1 |
| SCRUFL1120F01.g | GS1_SS_24040_13068 | Unknown | Uncharacterized | .          | . |                                                                                                                                                                                                                                                           | unknown [Zea mays]     | down (-5.2200,-4.0400) | 0 | 1 | 0 | 1 |
| SCCCCL3080D06.g | GS1_SS_10949_11586 | Unknown | Uncharacterized | .          | . | RING finger protein 126-B                                                                                                                                                                                                                                 | unknown [Zea mays]     | down (-2.6200,-3.1300) | 0 | 1 | 0 | 1 |
| SCSBAD1054F04.g | GS1_SS_20522_07380 | Unknown | Uncharacterized | .          | . | RCC1 and BTB domain-containing protein 1; Regulator of chromosome condensation and BTB domain-containing protein 1                                                                                                                                        | unknown [Zea mays]     | down (-3.0800,-4.9200) | 0 | 1 | 0 | 1 |
| SCQSR2033E04.g  | GS1_SS_13697_06821 | Unknown | Uncharacterized | .          | . | hypothetical protein LOC100191169 [Zea mays] unknown [Zea mays]                                                                                                                                                                                           |                        | down (-2.1200,-5.0300) | 0 | 1 | 0 | 1 |

|                 |                    |         |                 |                      |                                                                                                                                                     |                                                                                                                                                                                                                                           |  |                        |  |   |   |   |   |
|-----------------|--------------------|---------|-----------------|----------------------|-----------------------------------------------------------------------------------------------------------------------------------------------------|-------------------------------------------------------------------------------------------------------------------------------------------------------------------------------------------------------------------------------------------|--|------------------------|--|---|---|---|---|
| SCRFLR2038A05.g | GS1_SS_04156_10152 | Unknown | uncharacterized | .                    | Protein EXECUTER 1, chloroplastic;                                                                                                                  | unknown [Zea mays]                                                                                                                                                                                                                        |  | up (2.1700,2.9800)     |  | 1 | 0 | 0 | 1 |
| SCEPAM1021H11.g | GS1_SS_01988_14366 | Unknown | Uncharacterized | .                    | Rubredoxin; Rd                                                                                                                                      | Os08g0323400 [Oryza sativa (japonica cultivar-group)] putative rubredoxin [Oryza sativa Japonica Group] Os08g0323400 [Oryza sativa (japonica cultivar-group)] hypothetical protein Osl_027854 [Oryza sativa (indica cultivar-group)]      |  | down (-4.5600,-5.1100) |  | 0 | 1 | 0 | 1 |
| SCEPAM1022B03.g | GS1_SS_01990_03904 | Unknown | Uncharacterized | .                    | .                                                                                                                                                   | unknown [Zea mays]                                                                                                                                                                                                                        |  | down (-3.1600,-4.9600) |  | 0 | 1 | 0 | 1 |
| SCVPCL6042H01.g | GS1_SS_02010_10791 | Unknown | uncharacterized | .                    | .                                                                                                                                                   | unknown [Zea mays]                                                                                                                                                                                                                        |  | down (-3.3400,-3.2800) |  | 0 | 1 | 0 | 1 |
| SCEPAM1023G09.g | GS1_SS_02008_10627 | Unknown | uncharacterized | .                    | .                                                                                                                                                   | unknown [Zea mays]                                                                                                                                                                                                                        |  | up (5.0400,6.2200)     |  | 1 | 0 | 0 | 1 |
| SCRFFL1025D09.g | GS1_SS_23973_10738 | Unknown | Uncharacterized | .                    | .                                                                                                                                                   | Os06g0603600 [Oryza sativa (japonica cultivar-group)] putative ids-4 protein [Oryza sativa Japonica Group] Os06g0603600 [Oryza sativa (japonica cultivar-group)] hypothetical protein Osl_021053 [Oryza sativa (japonica cultivar-group)] |  | down (-1.5700,-1.5900) |  | 0 | 1 | 0 | 1 |
| SCRFST1043C02.g | GS1_SS_17125_05715 | Unknown | uncharacterized | .                    | Ubiquinone biosynthesis methyltransferase coq-5, mitochondrial;                                                                                     | unknown [Zea mays]                                                                                                                                                                                                                        |  | down (-3.7500,-4.3100) |  | 0 | 1 | 0 | 1 |
| SCQSFL3037F08.b | GS1_SS_22639_11081 | Unknown | uncharacterized | .                    | .                                                                                                                                                   | unknown [Zea mays]                                                                                                                                                                                                                        |  | down (-3.3300,-3.0900) |  | 0 | 1 | 0 | 1 |
| SCUTRZ3106F01.g | GS1_SS_17141_18080 | Unknown | uncharacterized | No matches           | non-coding                                                                                                                                          | .                                                                                                                                                                                                                                         |  | down (-2.7900,-5.3900) |  | 0 | 1 | 0 | 1 |
| SCRURT3064H08.g | GS1_SS_25020_13193 | Unknown | Uncharacterized | .                    | Probable plastid-lipid-associated protein 8, chloroplast precursor (Fibrillin-8)                                                                    | unknown [Zea mays]                                                                                                                                                                                                                        |  | down (-3.1800,-3.5600) |  | 0 | 1 | 0 | 1 |
| SCSGSB1006G07.g | GS1_SS_22670_12122 | Unknown | uncharacterized | .                    | .                                                                                                                                                   | unknown [Zea mays]                                                                                                                                                                                                                        |  | down (-3.4900,-2.8800) |  | 0 | 1 | 0 | 1 |
| SCSBFL5018D05.g | GS1_SS_23264_08545 | Unknown | uncharacterized | .                    | .                                                                                                                                                   | hypothetical protein LOC100192013 [Zea mays] unknown [Zea mays]                                                                                                                                                                           |  | down (-3.9400,-5.1000) |  | 0 | 1 | 0 | 1 |
| SCUTFL3075D09.g | GS1_SS_23241_16748 | Unknown | Uncharacterized | Transcription Factor | hormone-related/auxin/Aux/IAA                                                                                                                       | Auxin-responsive protein IAA25                                                                                                                                                                                                            |  | down (-4.8500,-3.7600) |  | 0 | 1 | 0 | 1 |
| SCSBFL1044C08.g | GS1_SS_00345_11894 | Unknown | uncharacterized | .                    | .                                                                                                                                                   | unknown [Zea mays]                                                                                                                                                                                                                        |  | down (-3.6100,-8.5400) |  | 0 | 2 | 0 | 2 |
| SCUTFL1055C05.g | GS1_AS_21344_07587 | Unknown | uncharacterized | .                    | .                                                                                                                                                   | .                                                                                                                                                                                                                                         |  | up (3.8900,4.5000)     |  | 1 | 0 | 0 | 1 |
| SCJLFL4183G10.g | GS1_SS_24287_11029 | Unknown | uncharacterized | .                    | .                                                                                                                                                   | hypothetical protein Osl_014192 [Oryza sativa (indica cultivar-group)]                                                                                                                                                                    |  | down (-6.8500,-8.7600) |  | 0 | 1 | 0 | 1 |
| SCRLAM1012C06.g | GS1_SS_04481_06854 | Unknown | Uncharacterized | .                    | Rop guanine nucleotide exchange factor 2 (RopGEF2)                                                                                                  | unknown [Zea mays]                                                                                                                                                                                                                        |  | down (-3.4500,-4.9400) |  | 0 | 1 | 0 | 1 |
| SCACAM1071F11.g | GS1_SS_01677_14995 | Unknown | Uncharacterized | Receptors            | receptor Ser/Thr kinase                                                                                                                             | caneS receptor-21                                                                                                                                                                                                                         |  | up (2.2500,2.5600)     |  | 1 | 0 | 0 | 1 |
| SCVPST1061E07.g | GS1_SS_18283_16067 | Unknown | Uncharacterized | Protein metabolism   | Lysyl-tRNA synthetase (EC 6.1.1.6) (Lysine-tRNA ligase) (LysRS)                                                                                     | hypothetical protein Osl_007346 [Oryza sativa (japonica cultivar-group)]                                                                                                                                                                  |  | down (-2.5600,-2.4700) |  | 0 | 1 | 0 | 1 |
| SCEQRZ3091A05.g | GS1_SS_23603_09830 | Unknown | Uncharacterized | .                    | .                                                                                                                                                   | unknown [Zea mays]                                                                                                                                                                                                                        |  | up (5.5500,3.8200)     |  | 1 | 0 | 0 | 1 |
| SCEZHR1088F08.g | GS1_SS_07766_08810 | Unknown | Uncharacterized | .                    | .                                                                                                                                                   | unknown [Zea mays]                                                                                                                                                                                                                        |  | down (-4.2000,-3.9500) |  | 0 | 1 | 0 | 1 |
| SCJFRZ1007H05.g | GS1_SS_17513_09918 | Unknown | Uncharacterized | .                    | .                                                                                                                                                   | Os09g0456100 [Oryza sativa (japonica cultivar-group)] remorin protein-like [Oryza sativa Japonica Group] remorin protein-like [Oryza sativa Japonica Group] Os09g0456100 [Oryza sativa (japonica cultivar-group)]                         |  | down (-3.1000,-4.1000) |  | 0 | 1 | 0 | 1 |
| SCACAM1071C11.g | GS1_SS_01690_10145 | Unknown | uncharacterized | .                    | Filament-like plant protein 1; AtFPP1                                                                                                               | hypothetical protein Osl_034060 [Oryza sativa (indica cultivar-group)]                                                                                                                                                                    |  | down (-2.6900,-5.0700) |  | 0 | 1 | 0 | 1 |
| SCJLRZ1024B01.g | GS1_SS_22617_13999 | Unknown | uncharacterized | .                    | .                                                                                                                                                   | unknown [Zea mays]                                                                                                                                                                                                                        |  | down (-3.0000,-3.2400) |  | 0 | 1 | 0 | 1 |
| SCVPLR2019H02.g | GS1_SS_21581_04497 | Unknown | Uncharacterized | .                    | Pyrophosphate-energized vacuolar membrane proton pump; Pyrophosphate-energized inorganic pyrophosphatase; H(+)-PPase; Vacuolar H(+)-pyrophosphatase | vacuolar H+-translocating inorganic pyrophosphatase [Zea mays]                                                                                                                                                                            |  | down (-3.4400,-3.2700) |  | 0 | 1 | 0 | 1 |
| SCQGS1045G04.g  | GS1_SS_25462_11885 | Unknown | Uncharacterized | .                    | Lysine histidine transporter-like 1 OS=Arabidopsis thaliana GN=At1g48640 PE=3 SV=2                                                                  | unknown [Zea mays]                                                                                                                                                                                                                        |  | up (6.8800,5.7800)     |  | 1 | 0 | 0 | 1 |
| SCEQLB1063H05.g | GS1_SS_09095_14043 | Unknown | Uncharacterized | .                    | .                                                                                                                                                   | unknown [Zea mays]                                                                                                                                                                                                                        |  | down (-4.0500,-5.7200) |  | 0 | 1 | 0 | 1 |
| SCJFRZ2012G04.g | GS1_SS_00453_00482 | Unknown | uncharacterized | .                    | Vacuolar transporter chaperone 2; Phosphate metabolism protein 1                                                                                    | unknown [Zea mays]                                                                                                                                                                                                                        |  | down (-1.9200,-1.7800) |  | 0 | 1 | 0 | 1 |

|                 |                    |         |                 |             |                                                                                                                                                                                                                    |                                                                                                                                                                                                                                                |  |                        |                        |   |   |   |   |
|-----------------|--------------------|---------|-----------------|-------------|--------------------------------------------------------------------------------------------------------------------------------------------------------------------------------------------------------------------|------------------------------------------------------------------------------------------------------------------------------------------------------------------------------------------------------------------------------------------------|--|------------------------|------------------------|---|---|---|---|
| SCSGAM2076F12.g | GS1_SS_05443_01262 | Unknown | Uncharacterized | .           | High affinity cationic amino acid transporter 1; CAT-1; CAT1; System Y+ basic amino acid transporter; Solute carrier family 7 member 1; Ecotropic retroviral leukemia receptor; Ecotropic retrovirus receptor; ERR | unknown [Zea mays]                                                                                                                                                                                                                             |  | up (3.1800,3.4500)     | up (4.9400,4.4400)     | 2 | 0 | 0 | 2 |
| SCJLST1019A04.g | GS1_SS_25442_07597 | Unknown | uncharacterized | .           | .                                                                                                                                                                                                                  | .                                                                                                                                                                                                                                              |  |                        | down (-3.7300,-3.0000) | 0 | 1 | 0 | 1 |
| SCSGAD1143A04.g | GS1_SS_23926_14280 | Unknown | uncharacterized | .           | .                                                                                                                                                                                                                  | Os03g0628800 [Oryza sativa (japonica cultivar-group)] H1flk, putative, expressed [Oryza sativa (japonica cultivar-group)] Os03g0628800 [Oryza sativa (japonica cultivar-group)]                                                                |  |                        | down (-3.5800,-4.0000) | 0 | 1 | 0 | 1 |
| SCRFAM2127C07.g | GS1_SS_22733_00407 | Unknown | uncharacterized | .           | UPF0016 membrane protein slI0615                                                                                                                                                                                   | unnamed protein product [Vitis vinifera]                                                                                                                                                                                                       |  |                        | down (-4.6600,-6.9000) | 0 | 1 | 0 | 1 |
| SCMCL6027C07.g  | GS1_SS_06692_14115 | Unknown | uncharacterized | .           | .                                                                                                                                                                                                                  | unknown [Zea mays]                                                                                                                                                                                                                             |  |                        | up (4.8700,5.3100)     | 1 | 0 | 0 | 1 |
| SCJFRT2055A07.g | GS1_AS_13349_04391 | Unknown | Uncharacterized | .           | .                                                                                                                                                                                                                  | hypothetical protein Osl_019431 [Oryza sativa (indica cultivar-group)]                                                                                                                                                                         |  | down (-2.3000,-3.6000) |                        | 0 | 1 | 0 | 1 |
| SCSFAM1077G08.g | GS1_SS_03255_07840 | Unknown | Uncharacterized | .           | .                                                                                                                                                                                                                  | hypothetical protein SORBIDRAFT_01g013080 [Sorghum bicolor] hypothetical protein SORBIDRAFT_01g013080 [Sorghum bicolor]                                                                                                                        |  |                        | up (4.2900,4.1700)     | 1 | 0 | 0 | 1 |
| SCEPAM2053E04.g | GS1_SS_04031_10312 | Unknown | Uncharacterized | .           | .                                                                                                                                                                                                                  | unknown [Zea mays]                                                                                                                                                                                                                             |  |                        | down (-3.1500,-3.8100) | 0 | 1 | 0 | 1 |
| SCEZFL5086G02.g | GS1_SS_23680_05168 | Unknown | uncharacterized | .           | .                                                                                                                                                                                                                  | unknown [Zea mays]                                                                                                                                                                                                                             |  | down (-3.5900,-4.2400) | down (-5.9800,-5.4400) | 0 | 2 | 0 | 2 |
| SCCCSB1003D09.g | GS1_SS_21552_04813 | Unknown | uncharacterized | .           | Protein IQ-DOMAIN 14                                                                                                                                                                                               | hypothetical protein Osl_004661 [Oryza sativa (indica cultivar-group)]                                                                                                                                                                         |  | down (-3.0700,-4.1200) | down (-2.9300,-5.5900) | 0 | 2 | 0 | 2 |
| SCSFAM1077C08.g | GS1_SS_03248_12705 | Unknown | Uncharacterized | .           | .                                                                                                                                                                                                                  | .                                                                                                                                                                                                                                              |  |                        | up (3.4000,4.7600)     | 1 | 0 | 0 | 1 |
| SCEZLB1014G11.g | GS1_SS_09548_09048 | Unknown | Uncharacterized | .           | Pollen-specific protein C13 precursor                                                                                                                                                                              | unknown [Zea mays]                                                                                                                                                                                                                             |  | down (-2.2700,-7.0500) | down (-5.5100,-6.4600) | 0 | 2 | 0 | 2 |
| SCRULB1060H04.g | GS1_SS_02491_04922 | Unknown | Uncharacterized | .           | .                                                                                                                                                                                                                  | unknown [Zea mays]                                                                                                                                                                                                                             |  | up (4.1300,4.0400)     |                        | 1 | 0 | 0 | 1 |
| SCMCAM2080E02.g | GS1_SS_02481_16398 | Unknown | Uncharacterized | Development | Transcriptional co-repressor LEUNIG                                                                                                                                                                                | putative transcriptional corepressor LEUNIG [Oryza sativa Japonica Group]                                                                                                                                                                      |  | up (4.0300,6.2000)     | up (4.4300,4.6700)     | 2 | 0 | 0 | 2 |
| SCCCHR1004C05.g | GS1_SS_07375_12099 | Unknown | uncharacterized | No matches  | .                                                                                                                                                                                                                  | Os05g0128100 [Oryza sativa (japonica cultivar-group)] Os05g0128100 [Oryza sativa (japonica cultivar-group)]                                                                                                                                    |  | down (-3.4000,-4.9200) | down (-4.8400,-3.5000) | 0 | 2 | 0 | 2 |
| SCBFRZ2019D02.g | GS1_SS_03259_08864 | Unknown | uncharacterized | No matches  | non-coding                                                                                                                                                                                                         | unknown [Zea mays]                                                                                                                                                                                                                             |  |                        | down (-4.5600,-6.5100) | 0 | 1 | 0 | 1 |
| SCUTST3089H07.g | GS1_AS_16325_07363 | Unknown | uncharacterized | .           | .                                                                                                                                                                                                                  | hypothetical protein Osl_009930 [Oryza sativa (indica cultivar-group)]                                                                                                                                                                         |  | up (2.5900,4.3900)     | up (5.4900,4.4200)     | 2 | 0 | 0 | 2 |
| SCRUAD1134G12.g | GS1_SS_25641_13345 | Unknown | Uncharacterized | .           | .                                                                                                                                                                                                                  | .                                                                                                                                                                                                                                              |  |                        | up (3.2400,3.5000)     | 1 | 0 | 0 | 1 |
| SCEQRT2027E11.g | GS1_SS_12997_06596 | Unknown | uncharacterized | .           | .                                                                                                                                                                                                                  | hypothetical protein [Oryza sativa Japonica Group] hypothetical protein [Oryza sativa Japonica Group] hypothetical protein Osl_001613 [Oryza sativa (japonica cultivar-group)]                                                                 |  |                        | down (-2.9100,-4.0900) | 0 | 1 | 0 | 1 |
| SCCCCL3001D12.g | GS1_SS_18681_12592 | Unknown | uncharacterized | .           | .                                                                                                                                                                                                                  | .                                                                                                                                                                                                                                              |  |                        | down (-4.8800,-3.6600) | 0 | 1 | 0 | 1 |
| SCJFRZ2031G06.g | GS1_SS_18112_09552 | Unknown | uncharacterized | .           | Putative leucine-rich repeat-containing protein DDB0188916                                                                                                                                                         | Os10g0504600 [Oryza sativa (japonica cultivar-group)] Chorion family 2 protein, expressed [Oryza sativa (japonica cultivar-group)] Os10g0504600 [Oryza sativa (japonica cultivar-group)]                                                       |  | down (-2.5600,-5.0300) | down (-3.4800,-5.6100) | 0 | 2 | 0 | 2 |
| SCRFST1045E11.g | GS1_SS_18115_12912 | Unknown | Uncharacterized | .           | .                                                                                                                                                                                                                  | Os04g0644600 [Oryza sativa (japonica cultivar-group)] OSJNBa0033G05.17 [Oryza sativa (japonica cultivar-group)] Os04g0644600 [Oryza sativa (japonica cultivar-group)] hypothetical protein Osl_015670 [Oryza sativa (japonica cultivar-group)] |  |                        | down (-3.6100,-3.6700) | 0 | 1 | 0 | 1 |
| SCEQRT1025F12.g | GS1_SS_18129_08434 | Unknown | Uncharacterized | .           | .                                                                                                                                                                                                                  | unknown [Zea mays]                                                                                                                                                                                                                             |  |                        | down (-3.2000,-4.1500) | 0 | 1 | 0 | 1 |
| SCSGFL4036B09.g | GS1_SS_22987_07206 | Unknown | Uncharacterized | .           | .                                                                                                                                                                                                                  | unknown [Zea mays]                                                                                                                                                                                                                             |  |                        | up (3.4700,3.3200)     | 1 | 0 | 0 | 1 |
| SCSGAD1007F02.g | GS1_SS_01384_10946 | Unknown | uncharacterized | .           | .                                                                                                                                                                                                                  | unknown [Zea mays]                                                                                                                                                                                                                             |  | up (4.9700,5.2900)     | up (4.1600,3.4400)     | 2 | 0 | 0 | 2 |
| SCRLSD1013A03.g | GS1_SS_25276_09274 | Unknown | Uncharacterized | No matches  | .                                                                                                                                                                                                                  | .                                                                                                                                                                                                                                              |  | up (3.1100,3.3200)     |                        | 1 | 0 | 0 | 1 |

|                 |                    |         |                 |                         |                      |                                                                                                                                                                                                                                                            |  |                        |                        |   |   |   |   |
|-----------------|--------------------|---------|-----------------|-------------------------|----------------------|------------------------------------------------------------------------------------------------------------------------------------------------------------------------------------------------------------------------------------------------------------|--|------------------------|------------------------|---|---|---|---|
| SCSGST3121C08.g | GS1_SS_19337_12324 | Unknown | Uncharacterized | .                       | .                    | unknown [Zea mays]                                                                                                                                                                                                                                         |  |                        | down (-4.1100,-5.3600) | 0 | 1 | 0 | 1 |
| SCSGHR1070G09.g | GS1_AS_08601_04577 | Unknown | uncharacterized | .                       | .                    | .                                                                                                                                                                                                                                                          |  |                        | down (-2.7000,-4.4700) | 0 | 1 | 0 | 1 |
| SCEPLR1030C10.g | GS1_SS_12574_08648 | Unknown | uncharacterized | .                       | .                    | Fasciclin-like arabinogalactan protein 16; unknown [Zea mays]                                                                                                                                                                                              |  | down (-2.8600,-5.4200) | down (-3.2800,-6.0700) | 0 | 2 | 0 | 2 |
| SCSGST1069F09.g | GS1_SS_18187_00760 | Unknown | Uncharacterized | .                       | .                    | Probable gibberellin receptor GID1L3; GID1-like protein 3; unknown [Zea mays]                                                                                                                                                                              |  |                        | down (-3.9200,-5.4100) | 0 | 1 | 0 | 1 |
| SCEPRZ1009A03.g | GS1_SS_14268_12617 | Unknown | uncharacterized | .                       | .                    | unknown [Zea mays]                                                                                                                                                                                                                                         |  |                        | down (-6.1400,-4.1300) | 0 | 1 | 0 | 1 |
| SCSFAM1075A09.g | GS1_SS_24278_11465 | Unknown | Uncharacterized | .                       | .                    | Photosystem II stability/assembly factor HCF136, chloroplastic; unknown [Zea mays]                                                                                                                                                                         |  |                        | down (-3.5100,-4.6200) | 0 | 1 | 0 | 1 |
| SCUTSD1024A05.g | GS1_SS_25963_19440 | Unknown | Uncharacterized | Carbohydrate metabolism | .                    | Isoamylase-type starch debranching enzyme ISO2; unknown [Zea mays]                                                                                                                                                                                         |  |                        | down (-3.3000,-3.7300) | 0 | 1 | 0 | 1 |
| SCQSD1048C09.g  | GS1_SS_25961_16238 | Unknown | uncharacterized | No matches              | .                    | .                                                                                                                                                                                                                                                          |  | down (-4.0800,-3.9000) | down (-4.2800,-3.9000) | 0 | 2 | 0 | 2 |
| SCBGST3104A06.g | GS1_SS_22365_04682 | Unknown | Uncharacterized | .                       | .                    | Pentatricopeptide repeat-containing protein At1g06580; hypothetical protein OsJ_017109 [Oryza sativa (japonica cultivar-group)]                                                                                                                            |  |                        | down (-3.0600,-2.6400) | 0 | 1 | 0 | 1 |
| SCMCLR1053D05.g | GS1_SS_02233_07202 | Unknown | Uncharacterized | .                       | .                    | Os02g0153000 [Oryza sativa (japonica cultivar-group)] ternary complex factor MIP1-like [Oryza sativa Japonica Group] ternary complex factor MIP1-like [Oryza rufipogon] ternary complex factor MIP1-like [Oryza sativa (indica cultivar-group)] Os02g01530 |  | down (-4.1700,-3.5200) |                        | 0 | 1 | 0 | 1 |
| SCVPFL3047B03.g | GS1_SS_22356_16195 | Unknown | Uncharacterized | Development             | cell differentiation | Annexin A13 (Annexin XIII) (Annexin, intestine-specific) (ISA); hypothetical protein LOC100193259 [Zea mays]; unknown [Zea mays]                                                                                                                           |  | down (-2.3500,-2.4900) |                        | 0 | 1 | 0 | 1 |
| SCJLRT1022D02.g | GS1_SS_12603_01519 | Unknown | Uncharacterized | .                       | .                    | hypothetical protein LOC100193259 [Zea mays]; unknown [Zea mays]                                                                                                                                                                                           |  |                        | down (-4.5100,-3.5800) | 0 | 1 | 0 | 1 |
| SCCCLR2C02E04.g | GS1_SS_11306_09232 | Unknown | uncharacterized | .                       | .                    | Probable arylformamidase; Kynurenine formamidase: KF; unknown [Zea mays]                                                                                                                                                                                   |  | up (5.7100,3.3100)     |                        | 1 | 0 | 0 | 1 |
| SCEPLB1044H12.g | GS1_SS_25310_18827 | Unknown | Uncharacterized | Unknown protein         | .                    | unknown [Zea mays]                                                                                                                                                                                                                                         |  |                        | down (-3.4100,-3.4600) | 0 | 1 | 0 | 1 |
| SCRFS1022C11.g  | GS1_SS_25632_12776 | Unknown | uncharacterized | .                       | .                    | branched-chain amino acid aminotransferase [Hordeum vulgare subsp. vulgare]; unknown [Zea mays]                                                                                                                                                            |  | up (6.9400,5.1800)     | up (6.7100,5.0300)     | 2 | 0 | 0 | 2 |
| SCRFS1022A08.g  | GS1_SS_25631_19996 | Unknown | Uncharacterized | Stress                  | .                    | induced; unknown [Zea mays]                                                                                                                                                                                                                                |  |                        | up (3.0500,3.2800)     | 1 | 0 | 0 | 1 |
| SCMCLV1033A03.g | GS1_SS_26273_06159 | Unknown | Uncharacterized | .                       | .                    | Os08g0515800 [Oryza sativa (japonica cultivar-group)] unknown protein [Oryza sativa Japonica Group] Os08g0515800 [Oryza sativa (japonica cultivar-group)] hypothetical protein OsJ_026814 [Oryza sativa (japonica cultivar-group)]                         |  | down (-2.7100,-3.9100) |                        | 0 | 1 | 0 | 1 |
| SCUTFL1063H04.g | GS1_SS_22782_10003 | Unknown | Uncharacterized | .                       | .                    | unknown [Zea mays]                                                                                                                                                                                                                                         |  | down (-1.9800,-3.1900) |                        | 0 | 1 | 0 | 1 |
| SCJLLR1107G06.g | GS1_SS_22777_13393 | Unknown | uncharacterized | Carbohydrate metabolism | .                    | hypothetical protein LOC100192571 [Zea mays]; unknown [Zea mays]; unknown [Zea mays]                                                                                                                                                                       |  | down (-2.8200,-5.6300) |                        | 0 | 1 | 0 | 1 |
| SCBFRZ2048F01.g | GS1_SS_26284_05683 | Unknown | uncharacterized | .                       | .                    | Aspartyl protease-like Ser/Thr-rich protein T10 in DGCR region; unknown [Zea mays]                                                                                                                                                                         |  |                        | up (6.6100,6.4500)     | 1 | 0 | 0 | 1 |
| SCVPRT2080A07.g | GS1_SS_01321_01595 | Unknown | Uncharacterized | .                       | .                    | Putative sulfate transporter [Oryza sativa (japonica cultivar-group)] hypothetical protein OsJ_009404 [Oryza sativa (japonica cultivar-group)]                                                                                                             |  |                        | down (-2.8300,-3.5400) | 0 | 1 | 0 | 1 |
| SCJLRT1023H11.g | GS1_SS_24859_18199 | Unknown | Uncharacterized | No matches              | .                    | Low affinity sulfate transporter 3; unknown [Zea mays]                                                                                                                                                                                                     |  |                        | up (5.4500,5.8400)     | 1 | 0 | 0 | 1 |
| SCQGLF3054F10.g | GS1_SS_23006_08233 | Unknown | Uncharacterized | .                       | .                    | unknown [Zea mays]                                                                                                                                                                                                                                         |  |                        | down (-3.9200,-4.1600) | 0 | 1 | 0 | 1 |
| SCRFS1025F12.g  | GS1_SS_02662_13730 | Unknown | uncharacterized | .                       | .                    | unknown [Zea mays]                                                                                                                                                                                                                                         |  | down (-4.7600,-4.2400) | down (-5.2200,-6.9700) | 0 | 2 | 0 | 2 |
| SCEPSB1136B08.g | GS1_SS_18252_02954 | Unknown | uncharacterized | .                       | .                    | unknown [Zea mays]                                                                                                                                                                                                                                         |  |                        | down (-3.0200,-3.8900) | 0 | 1 | 0 | 1 |
| SCCCLR1067B06.g | GS1_SS_18246_11096 | Unknown | uncharacterized | .                       | .                    | Probable biogenesis of lysosome-related organelles complex 1 subunit 2; BLOC subunit 2; unknown [Zea mays]                                                                                                                                                 |  | up (1.8500,3.4200)     | up (3.4700,4.3500)     | 2 | 0 | 0 | 2 |
| SCEQRT2091D12.g | GS1_SS_13048_08838 | Unknown | uncharacterized | .                       | .                    | Barwin; unknown [Zea mays]                                                                                                                                                                                                                                 |  | up (1.4200,1.6700)     |                        | 1 | 0 | 0 | 1 |
| SCOGLB1038E11.g | GS1_SS_01280_11438 | Unknown | Uncharacterized | .                       | .                    | unknown [Zea mays]                                                                                                                                                                                                                                         |  | up (2.5000,3.6700)     | up (3.9100,5.4400)     | 2 | 0 | 0 | 2 |
| SCJFST1014A02.b | GS1_SS_12258_09006 | Unknown | uncharacterized | .                       | .                    | unknown [Zea mays]                                                                                                                                                                                                                                         |  |                        | up (3.4500,3.4100)     | 1 | 0 | 0 | 1 |
| SCUTRZ3103B07.g | GS1_SS_24883_09341 | Unknown | Uncharacterized | .                       | .                    | Os11g0109500 [Oryza sativa (japonica cultivar-group)] Uncharacterized 38.1 kDa protein; Os11g0109500 [Oryza sativa (japonica cultivar-group)]                                                                                                              |  |                        | down (-3.5800,-3.9800) | 0 | 1 | 0 | 1 |



|                 |                    |         |                 |                       |                                                                                             |                                                                                                                                                                                                                                   |                        |                        |                    |   |   |   |   |
|-----------------|--------------------|---------|-----------------|-----------------------|---------------------------------------------------------------------------------------------|-----------------------------------------------------------------------------------------------------------------------------------------------------------------------------------------------------------------------------------|------------------------|------------------------|--------------------|---|---|---|---|
| SCRLR1110H11.g  | GS1_SS_01284_12339 | Unknown | uncharacterized |                       |                                                                                             | hypothetical protein LOC100191278 [Zea mays]                                                                                                                                                                                      |                        |                        | up (3.4300,3.9100) | 1 | 0 | 0 | 1 |
| SCEQLR1092A03.g | GS1_SS_10385_03982 | Unknown | uncharacterized |                       |                                                                                             | unknown [Zea mays]                                                                                                                                                                                                                | down (-2.6600,-3.8900) | down (-4.3300,-4.1600) |                    | 0 | 2 | 0 | 2 |
| SCOGSD2047F01.g | GS1_SS_25860_10456 | Unknown | Uncharacterized |                       |                                                                                             | unknown [Zea mays]                                                                                                                                                                                                                |                        | up (4.4700,5.2000)     |                    | 1 | 0 | 0 | 1 |
| SCSBRZ3125B01.g | GS1_SS_18537_11660 | Unknown | uncharacterized |                       | Cysteine-rich receptor-like protein kinase 28; Cysteine-rich RLK28;                         | unknown [Zea mays]                                                                                                                                                                                                                |                        | up (4.6500,3.7500)     |                    | 1 | 0 | 0 | 1 |
| SCVPHR1094H06.g | GS1_SS_18536_09986 | Unknown | uncharacterized |                       |                                                                                             |                                                                                                                                                                                                                                   |                        | down (-4.5100,-4.0400) |                    | 0 | 1 | 0 | 1 |
| SCRFRZ3055H05.g | GS1_SS_16185_00711 | Unknown | Uncharacterized |                       |                                                                                             | unknown [Zea mays]                                                                                                                                                                                                                | up (2.5400,2.8500)     |                        |                    | 1 | 0 | 0 | 1 |
| SCEQRT2029C02.g | GS1_SS_11437_11716 | Unknown | uncharacterized |                       |                                                                                             | unknown [Zea mays]                                                                                                                                                                                                                | down (-2.6700,-3.3100) |                        |                    | 0 | 1 | 0 | 1 |
| SCUTSD2025D08.g | GS1_SS_25514_13378 | Unknown | Uncharacterized |                       |                                                                                             | hypothetical protein LOC100191176 [Zea mays]                                                                                                                                                                                      | down (-2.8400,-3.0200) |                        |                    | 0 | 1 | 0 | 1 |
| SCUTLR2008H10.g | GS1_SS_09610_06203 | Unknown | uncharacterized |                       |                                                                                             | unknown [Zea mays]                                                                                                                                                                                                                |                        | up (3.4200,5.2300)     |                    | 1 | 0 | 0 | 1 |
| SCRULB1059F07.g | GS1_SS_04611_12552 | Unknown | Uncharacterized | Pathogenicity         | R-gene                                                                                      | With LRR / NBS-LRR                                                                                                                                                                                                                |                        | down (-4.2700,-3.8100) |                    | 0 | 1 | 0 | 1 |
| SCEQRT1030C02.g | GS1_SS_12084_12778 | Unknown | Uncharacterized |                       |                                                                                             | unknown [Zea mays]                                                                                                                                                                                                                |                        | up (3.7800,4.1400)     |                    | 1 | 0 | 0 | 1 |
| SCEQLR1092B01.g | GS1_SS_10388_08647 | Unknown | uncharacterized |                       |                                                                                             | unknown [Zea mays]                                                                                                                                                                                                                |                        | down (-5.8500,-8.1300) |                    | 0 | 1 | 0 | 1 |
| SCEZLB1007D12.g | GS1_SS_10899_12734 | Unknown | uncharacterized |                       |                                                                                             | unknown [Zea mays]                                                                                                                                                                                                                | down (-2.4200,-4.2400) | down (-4.0800,-6.2000) |                    | 0 | 2 | 0 | 2 |
| SCEQLR1092A06.g | GS1_SS_10386_13595 | Unknown | Uncharacterized |                       |                                                                                             | unknown [Zea mays]                                                                                                                                                                                                                |                        | down (-3.8600,-4.5700) |                    | 0 | 1 | 0 | 1 |
| SCEZAD1081D01.g | GS1_SS_19544_12238 | Unknown | uncharacterized |                       |                                                                                             | unknown [Zea mays]                                                                                                                                                                                                                |                        | down (-3.0500,-5.0000) |                    | 0 | 1 | 0 | 1 |
| SCRFRZ3055F03.g | GS1_SS_16181_09065 | Unknown | uncharacterized |                       | Chemocyanin precursor (Basic blue protein) (Plantacyanin)                                   | hypothetical protein Osl_021677 [Oryza sativa (indica cultivar-group)]                                                                                                                                                            |                        | up (6.7100,3.5600)     |                    | 1 | 0 | 0 | 1 |
| SCEQLR1091E07.g | GS1_SS_10378_04719 | Unknown | Uncharacterized |                       |                                                                                             | Os02g0694800 [Oryza sativa (japonica cultivar-group)] unknown protein [Oryza sativa Japonica Group] unknown protein [Oryza sativa Japonica Group] Os02g0694800 [Oryza sativa (japonica cultivar-group)]                           |                        | down (-3.3000,-4.1500) |                    | 0 | 1 | 0 | 1 |
| SCJFRZ2009D09.g | GS1_SS_14796_14133 | Unknown | uncharacterized |                       | OTU domain-containing protein 4; HIV-1-induced protein HIN-1                                | unknown [Zea mays]                                                                                                                                                                                                                |                        | down (-3.9300,-5.2500) |                    | 0 | 1 | 0 | 1 |
| SCRLRZ3040E11.g | GS1_SS_16235_12911 | Unknown | Uncharacterized |                       |                                                                                             | hypothetical protein LOC100191676 [Zea mays]                                                                                                                                                                                      |                        | down (-3.6500,-4.2000) |                    | 0 | 1 | 0 | 1 |
| SCSGLV1012B03.g | GS1_AS_26145_02181 | Unknown | Uncharacterized |                       |                                                                                             |                                                                                                                                                                                                                                   | up (4.3300,6.9900)     | up (5.7100,5.8500)     |                    | 2 | 0 | 0 | 2 |
| SCMCLR1010A05.g | GS1_AS_10755_04665 | Unknown | Uncharacterized |                       |                                                                                             |                                                                                                                                                                                                                                   |                        | down (-3.9400,-3.4400) |                    | 0 | 1 | 0 | 1 |
| SCJLST1020E05.g | GS1_SS_17782_07409 | Unknown | Uncharacterized |                       |                                                                                             | unknown [Zea mays]                                                                                                                                                                                                                |                        | up (3.5500,3.9800)     |                    | 1 | 0 | 0 | 1 |
| SCOSLB1051H09.g | GS1_SS_19213_02661 | Unknown | Uncharacterized |                       |                                                                                             | unknown [Zea mays]                                                                                                                                                                                                                | up (6.1400,3.7300)     |                        |                    | 1 | 0 | 0 | 1 |
| SCVPLB1016D01.g | GS1_SS_19588_16380 | Unknown | Uncharacterized | Amino acid metabolism | Cell division inhibitor                                                                     | Os02g0834700 [Oryza sativa (japonica cultivar-group)] cell division inhibitor-like [Oryza sativa Japonica Group] cell division inhibitor-like [Oryza sativa Japonica Group] Os02g0834700 [Oryza sativa (japonica cultivar-group)] |                        | down (-3.1600,-3.6100) |                    | 0 | 1 | 0 | 1 |
| SCCCLR1C11C06.g | GS1_SS_09664_02008 | Unknown | uncharacterized | No matches            |                                                                                             | unknown [Zea mays]                                                                                                                                                                                                                | down (-2.6200,-5.9100) |                        |                    | 0 | 1 | 0 | 1 |
| SCEZRZ1017B05.g | GS1_SS_04550_10066 | Unknown | Uncharacterized |                       |                                                                                             | hypothetical protein Osl_006820 [Oryza sativa (indica cultivar-group)]                                                                                                                                                            |                        | down (-3.5300,-3.5900) |                    | 0 | 1 | 0 | 1 |
| SCRLSD2009D06.g | GS1_AS_25430_03194 | Unknown | uncharacterized | No matches            |                                                                                             |                                                                                                                                                                                                                                   |                        | down (-3.7200,-4.7900) |                    | 0 | 1 | 0 | 1 |
| SCSBFL1036C06.g | GS1_SS_20246_00899 | Unknown | Uncharacterized |                       | Uncharacterized protein C24B11.05                                                           | unknown [Zea mays]                                                                                                                                                                                                                | up (3.8300,3.2900)     | up (4.2100,3.9400)     |                    | 2 | 0 | 0 | 2 |
| SCCCFL4089H04.g | GS1_AS_22999_08089 | Unknown | uncharacterized |                       |                                                                                             |                                                                                                                                                                                                                                   | down (-2.1400,-3.2700) |                        |                    | 0 | 1 | 0 | 1 |
| SCCCLR1024C07.g | GS1_SS_10093_10376 | Unknown | uncharacterized |                       |                                                                                             | unknown [Zea mays]                                                                                                                                                                                                                | up (1.9600,4.3300)     |                        |                    | 1 | 0 | 0 | 1 |
| SCCCFL3002D01.g | GS1_SS_19820_09213 | Unknown | uncharacterized |                       |                                                                                             | unknown [Zea mays]                                                                                                                                                                                                                | down (-2.5200,-3.4500) |                        |                    | 0 | 1 | 0 | 1 |
| SCBGLR1120B07.g | GS1_SS_10078_07251 | Unknown | uncharacterized |                       |                                                                                             | unknown [Zea mays]                                                                                                                                                                                                                |                        | down (-4.0300,-4.2700) |                    | 0 | 1 | 0 | 1 |
| SCEZLR1052C01.g | GS1_SS_10435_05099 | Unknown | uncharacterized |                       |                                                                                             |                                                                                                                                                                                                                                   |                        | up (3.1600,3.2900)     |                    | 1 | 0 | 0 | 1 |
| SCUTLR2015D05.g | GS1_SS_12128_18579 | Unknown | Uncharacterized | Protein metabolism    | UDP-N-acetylglucosamine--peptide N-acetylglucosaminyltransferase 110 kDa subunit (EC 2.4.1. | hypothetical protein Osl_007133 [Oryza sativa (indica cultivar-group)]                                                                                                                                                            |                        | up (4.0900,4.3700)     |                    | 1 | 0 | 0 | 1 |
| SCCCRZ1001F11.g | GS1_SS_03474_00920 | Unknown | Uncharacterized |                       | Uncharacterized protein ycf39 30S ribosomal protein S21, chloroplastic                      | hypothetical protein LOC100192036 [Zea mays]                                                                                                                                                                                      |                        | down (-3.6500,-5.4000) |                    | 0 | 1 | 0 | 1 |
| SCRUAD1063A09.g | GS1_SS_00996_13218 | Unknown | uncharacterized |                       | Protein RUPTURED POLLEN GRAIN 1                                                             | unknown [Zea mays]                                                                                                                                                                                                                |                        | down (-3.6000,-3.8100) |                    | 0 | 1 | 0 | 1 |
| SCEQLB1063D10.g | GS1_SS_09088_14427 | Unknown | uncharacterized |                       |                                                                                             | unknown [Zea mays]                                                                                                                                                                                                                | up (2.0900,3.1600)     | up (4.5500,3.5100)     |                    | 2 | 0 | 0 | 2 |
| SCEQRT1029H04.g | GS1_SS_12121_10055 | Unknown | Uncharacterized | Library-specific      | By domain                                                                                   | Tryp_alpha_amyl                                                                                                                                                                                                                   |                        | down (-3.3900,-7.0600) |                    | 0 | 1 | 0 | 1 |
| SCSGHR1066C01.g | GS1_SS_08480_19263 | Unknown | Uncharacterized | Transporters          | Sugar transporters                                                                          | putative sorbitol transporter [Oryza sativa (japonica                                                                                                                                                                             |                        | up (3.0500,4.8200)     |                    | 1 | 0 | 0 | 1 |
| SCJFRZ2025E01.g | GS1_SS_16600_21832 | Unknown | uncharacterized | Unknown protein       |                                                                                             |                                                                                                                                                                                                                                   |                        | up (3.4600,4.8400)     |                    | 1 | 0 | 0 | 1 |

|                  |                    |         |                 |                |   |                                                                                                                           |                                                                                                                                                                                                                                                                                    |                        |                        |   |   |   |   |
|------------------|--------------------|---------|-----------------|----------------|---|---------------------------------------------------------------------------------------------------------------------------|------------------------------------------------------------------------------------------------------------------------------------------------------------------------------------------------------------------------------------------------------------------------------------|------------------------|------------------------|---|---|---|---|
| SCUTRZ2022E05.g  | GS1_SS_15058_11513 | Unknown | uncharacterized | .              | . | .                                                                                                                         | .                                                                                                                                                                                                                                                                                  | down (-4.0600,-5.8900) |                        | 0 | 1 | 0 | 1 |
| SCJFST1016C10.g  | GS1_SS_17694_09351 | Unknown | Uncharacterized | .              | . | Uncharacterized protein<br>At1g08160 OS=Arabidopsis<br>thaliana GN=At1g08160 PE=2<br>SV=1                                 | Os10g0547200 [Oryza sativa<br>(japonica cultivar-group)] Harpin-<br>induced protein 1 containing<br>protein, expressed [Oryza sativa<br>(japonica cultivar-group)]<br>Os10g0547200 [Oryza sativa<br>(japonica cultivar-group)]<br>hypothetical protein Osl_031087<br>[Oryza sativa |                        | up (6.0300,4.7500)     | 1 | 0 | 0 | 1 |
| SCEZLB1006D09.g  | GS1_SS_16619_12462 | Unknown | uncharacterized | .              | . | .                                                                                                                         | Os08g0505200 [Oryza sativa<br>(japonica cultivar-group)]<br>unknown protein [Oryza sativa<br>Japonica Group] unknown<br>protein [Oryza sativa Japonica<br>Group] Os08g0505200 [Oryza<br>sativa (japonica cultivar-group)]                                                          | down (-2.0600,-5.0200) | down (-3.8900,-6.8100) | 0 | 2 | 0 | 2 |
| SCACLR1132D10.g  | GS1_SS_22097_13974 | Unknown | uncharacterized | .              | . | .                                                                                                                         | unknown [Zea mays]                                                                                                                                                                                                                                                                 |                        | down (-3.7800,-5.2400) | 0 | 1 | 0 | 1 |
| SCQSLB1049B08.g  | GS1_SS_22106_00067 | Unknown | Uncharacterized | .              | . | RNA-dependent RNA polymerase<br>1 (Protein rdp1)                                                                          | hypothetical protein Osl_008023<br>[Oryza sativa (japonica cultivar-<br>group)]                                                                                                                                                                                                    |                        | down (-3.7400,-3.7800) | 0 | 1 | 0 | 1 |
| SCSBRZ2021A12.g  | GS1_SS_15018_00238 | Unknown | Uncharacterized | .              | . | .                                                                                                                         | hypothetical protein Osl_006929<br>[Oryza sativa (indica cultivar-<br>group)]                                                                                                                                                                                                      | down (-4.1000,-3.9100) |                        | 0 | 1 | 0 | 1 |
| SCEQLB1063H01.g  | GS1_SS_18982_10957 | Unknown | Uncharacterized | .              | . | Non-specific lipid-transfer<br>protein-like protein At5g64080;                                                            | unknown [Zea mays]                                                                                                                                                                                                                                                                 | up (4.5700,4.5700)     | up (5.1400,5.2800)     | 2 | 0 | 0 | 2 |
| SCSFRT2071F11.g  | GS1_SS_13907_00263 | Unknown | Uncharacterized | .              | . | .                                                                                                                         | unknown [Zea mays]                                                                                                                                                                                                                                                                 |                        | down (-3.3700,-3.0900) | 0 | 1 | 0 | 1 |
| SCJLRT2052C04.g  | GS1_SS_13509_08680 | Unknown | Uncharacterized | .              | . | .                                                                                                                         | unknown [Zea mays]                                                                                                                                                                                                                                                                 |                        | up (3.4500,3.1800)     | 1 | 0 | 0 | 1 |
| SCQSFL3038C04.b  | GS1_SS_24205_07257 | Unknown | Uncharacterized | Receptors      | . | Receptor Ser/Thr kinase-<br>unclassified                                                                                  | caneURLK-42                                                                                                                                                                                                                                                                        | down (-1.9700,-3.4400) | down (-3.5000,-4.5100) | 0 | 2 | 0 | 2 |
| SCQGLF1096G12.g  | GS1_SS_21393_10015 | Unknown | Uncharacterized | .              | . | Pentatricopeptide repeat-<br>containing protein At1g63080,<br>mitochondrial;                                              | pentatricopeptide repeat protein<br>5 [Zea mays] pentatricopeptide<br>repeat protein 5 [Zea mays]                                                                                                                                                                                  | down (-2.1700,-3.3800) |                        | 0 | 1 | 0 | 1 |
| SCEQLR1050C11.g  | GS1_SS_24210_14548 | Unknown | Uncharacterized | Protein kinase | . | .                                                                                                                         | caneUPK-55                                                                                                                                                                                                                                                                         |                        | down (-5.0000,-4.1200) | 0 | 1 | 0 | 1 |
| SCSBFL1036C06.g  | GS1_AS_20246_00900 | Unknown | Uncharacterized | .              | . | Uncharacterized protein<br>C24B11.05                                                                                      | unknown [Zea mays]                                                                                                                                                                                                                                                                 | up (3.0200,4.0400)     |                        | 1 | 0 | 0 | 1 |
| SCSGLR1025D03.g  | GS1_SS_19125_12207 | Unknown | uncharacterized | .              | . | .                                                                                                                         | unknown [Zea mays]                                                                                                                                                                                                                                                                 | down (-2.2900,-8.0400) |                        | 0 | 1 | 0 | 1 |
| SCUTAM2007G01.g  | GS1_SS_05369_11779 | Unknown | uncharacterized | .              | . | 50S ribosomal protein L34,<br>chloroplastic; CL34;                                                                        | unknown [Zea mays]                                                                                                                                                                                                                                                                 |                        | down (-5.2000,-5.8600) | 0 | 1 | 0 | 1 |
| SCCCSB1002F02.g  | GS1_SS_16639_06414 | Unknown | Uncharacterized | .              | . | .                                                                                                                         | unknown [Zea mays]                                                                                                                                                                                                                                                                 |                        | down (-3.2700,-5.0200) | 0 | 1 | 0 | 1 |
| SCRFFL1028F08.g  | GS1_SS_20330_05415 | Unknown | Uncharacterized | .              | . | .                                                                                                                         | unknown [Zea mays]                                                                                                                                                                                                                                                                 |                        | down (-3.6400,-4.1900) | 0 | 1 | 0 | 1 |
| SCJFRZ2005B05.g  | GS1_SS_22206_04937 | Unknown | uncharacterized | .              | . | .                                                                                                                         | unknown [Sorghum bicolor]                                                                                                                                                                                                                                                          | down (-2.3200,-3.7600) | down (-3.4400,-4.7500) | 0 | 2 | 0 | 2 |
| SCSFST1064E05.g  | GS1_SS_20706_13451 | Unknown | uncharacterized | .              | . | Putative flavin-containing<br>monooxygenase 2                                                                             | unknown [Zea mays]                                                                                                                                                                                                                                                                 | down (-2.2900,-3.3500) | down (-4.1200,-3.7700) | 0 | 2 | 0 | 2 |
| SCSBAD1126C08.g  | GS1_SS_21405_10656 | Unknown | Uncharacterized | .              | . | .                                                                                                                         | hypothetical protein<br>SORBIDRAFT_04g007840<br>[Sorghum bicolor] hypothetical<br>protein SORBIDRAFT_04g007840<br>[Sorghum bicolor]                                                                                                                                                | up (2.2000,5.8300)     |                        | 1 | 0 | 0 | 1 |
| SCVPFL1138E03.b  | GS1_SS_24140_00113 | Unknown | Uncharacterized | .              | . | Glutamate receptor 3.4; AtGLR4;<br>Ligand-gated ion channel 3.4;                                                          | hypothetical protein Osl_023330<br>[Oryza sativa (indica cultivar-<br>group)]<br>expressed protein [Oryza sativa<br>(japonica cultivar-group)]<br>hypothetical protein Osl_033073<br>[Oryza sativa (japonica cultivar-<br>group)]                                                  |                        | down (-4.3900,-3.1200) | 0 | 1 | 0 | 1 |
| SCSBAM1085H07.g  | GS1_SS_23824_07279 | Unknown | Uncharacterized | .              | . | .                                                                                                                         | unknown [Zea mays]                                                                                                                                                                                                                                                                 | up (5.4000,4.4600)     |                        | 1 | 0 | 0 | 1 |
| SCBGAM1093E09.g  | GS1_SS_01813_10587 | Unknown | uncharacterized | .              | . | .                                                                                                                         | unknown [Zea mays]                                                                                                                                                                                                                                                                 |                        | down (-1.8800,-3.2100) | 0 | 1 | 0 | 1 |
| SCCCRZ1001F11.g  | GS1_AS_03474_00919 | Unknown | Uncharacterized | .              | . | Uncharacterized protein ycf39                                                                                             | unknown [Zea mays]                                                                                                                                                                                                                                                                 | down (-2.4000,-3.0900) |                        | 0 | 1 | 0 | 1 |
| SCEQRT2027C06.g  | GS1_SS_24536_12695 | Unknown | uncharacterized | .              | . | .                                                                                                                         | unknown [Zea mays] unknown<br>[Zea mays]                                                                                                                                                                                                                                           | down (-1.8300,-1.8600) |                        | 0 | 1 | 0 | 1 |
| SCRCLAM1009H06.g | GS1_SS_03073_10462 | Unknown | Uncharacterized | .              | . | Transcription factor ICE1; Inducer<br>of CBF expression 1; Basic helix-<br>loop-helix protein 116; bHLH<br>116; AtbHLH116 | undeveloped tapetum 1 [Oryza<br>sativa (japonica cultivar-group)]                                                                                                                                                                                                                  | up (2.4900,3.2600)     | up (4.3200,3.3000)     | 2 | 0 | 0 | 2 |
| SCRCL6030F09.g   | GS1_SS_06848_13857 | Unknown | uncharacterized | .              | . | .                                                                                                                         | .                                                                                                                                                                                                                                                                                  |                        | up (3.2600,3.6400)     | 1 | 0 | 0 | 1 |
| SCEZRT2019G08.g  | GS1_SS_13220_12766 | Unknown | Uncharacterized | .              | . | .                                                                                                                         | unknown [Zea mays]                                                                                                                                                                                                                                                                 |                        | up (8.1500,5.1000)     | 1 | 0 | 0 | 1 |
| SCCCLB1002B03.g  | GS1_SS_07177_13460 | Unknown | Uncharacterized | .              | . | ELMO domain-containing protein<br>DDB_0233912                                                                             | hypothetical protein Osl_024650<br>[Oryza sativa (japonica cultivar-<br>group)]                                                                                                                                                                                                    | up (3.1400,2.5800)     |                        | 1 | 0 | 0 | 1 |

|                 |                    |                                 |                      |                      |                                                                  |                                                                          |  |                        |                        |   |   |   |   |
|-----------------|--------------------|---------------------------------|----------------------|----------------------|------------------------------------------------------------------|--------------------------------------------------------------------------|--|------------------------|------------------------|---|---|---|---|
| SCSFRT2069D03.g | GS1_SS_03447_06968 | Unknown                         | uncharacterized      |                      |                                                                  | hypothetical protein Osl_016009 [Oryza sativa (japonica cultivar-group)] |  | down (-2.6500,-3.6500) |                        | 0 | 1 | 0 | 1 |
| SCRLAM1009F09.g | GS1_SS_03068_07297 | Unknown                         | uncharacterized      |                      |                                                                  | putative gag-pol polyprotein [Zea mays]                                  |  | up (2.8500,3.0800)     |                        | 1 | 0 | 0 | 1 |
| SCSFSB1072B06.g | GS1_SS_16938_06182 | Unknown                         | Uncharacterized      |                      | Protein FLOWERING LOCUS T                                        | ZCN19 protein [Zea mays] ZCN19 [Zea mays] ZCN19 [Zea mays]               |  |                        | up (3.6300,5.7700)     | 1 | 0 | 0 | 1 |
| SCEPFL3085F03.g | GS1_SS_23488_07450 | Unknown                         | Uncharacterized      |                      |                                                                  | unknown [Zea mays]                                                       |  | down (-2.2500,-4.6700) |                        | 0 | 1 | 0 | 1 |
| SCSBFL1101H09.g | GS1_SS_23828_13863 | Unknown                         | Uncharacterized      |                      |                                                                  | unknown [Zea mays]                                                       |  | up (1.6300,1.9100)     |                        | 1 | 0 | 0 | 1 |
| SCEZAM1079E05.g | GS1_SS_02260_13046 | Unknown                         | uncharacterized      |                      |                                                                  | hypothetical protein Osl_024166 [Oryza sativa (japonica cultivar-group)] |  | down (-3.6100,-3.0100) |                        | 0 | 1 | 0 | 1 |
| SCBFRT3095H08.g | GS1_SS_25213_07990 | Unknown                         | uncharacterized      |                      |                                                                  |                                                                          |  |                        | down (-3.7900,-3.7800) | 0 | 1 | 0 | 1 |
| SCVPLR2012E08.g | GS1_SS_11675_13721 | Unknown                         | uncharacterized      |                      |                                                                  | unknown [Zea mays]                                                       |  | up (7.3500,4.7500)     | up (5.3800,6.2500)     | 2 | 0 | 0 | 2 |
| SCSBFL4066F01.g | GS1_SS_23398_15833 | Unknown                         | uncharacterized      | No matches           |                                                                  |                                                                          |  | up (1.8400,2.5700)     | down (-2.8200,-5.0900) | 1 | 1 | 0 | 2 |
| SCOGST3154C02.g | GS1_SS_16900_19689 | Unknown                         | Uncharacterized      | Transcription Factor |                                                                  | NAM                                                                      |  | down (-3.0800,-6.9100) | down (-4.2400,-4.6300) | 0 | 2 | 0 | 2 |
| SCCCSD2003H02.g | GS1_SS_25185_13860 | Unknown                         | Uncharacterized      |                      |                                                                  | hypothetical protein-like protein [Sorghum bicolor]                      |  | down (-2.5300,-3.0400) | down (-3.3800,-3.9300) | 0 | 2 | 0 | 2 |
| SCJLRZ1023D09.g | GS1_SS_22864_10620 | Unknown                         | Uncharacterized      |                      |                                                                  | unknown [Zea mays]                                                       |  | down (-2.4900,-5.6600) |                        | 0 | 1 | 0 | 1 |
| SCCCCL3005A05.b | GS1_SS_05831_10248 | Unknown                         | uncharacterized      |                      |                                                                  | unknown [Zea mays] unknown [Zea mays]                                    |  |                        | down (-4.0500,-4.0500) | 0 | 1 | 0 | 1 |
| SCQSHR1021B05.g | GS1_SS_16488_12071 | Unknown                         | Uncharacterized      |                      | Putative protein TPRXL                                           | unknown [Zea mays]                                                       |  |                        | up (5.4900,6.3300)     | 1 | 0 | 0 | 1 |
| SCRUSB1078F07.g | GS1_SS_22493_11974 | Unknown                         | Uncharacterized      |                      |                                                                  | unknown [Zea mays]                                                       |  | up (4.4700,4.7700)     | up (2.9100,4.0300)     | 2 | 0 | 0 | 2 |
| SCUTFL3071A04.g | GS1_SS_23438_12789 | Unknown                         | uncharacterized      |                      | Pentatricopeptide repeat-containing protein At1g18900            | hypothetical protein LOC100191386 [Zea mays] unknown [Zea mays]          |  | down (-3.4600,-6.7100) |                        | 0 | 1 | 0 | 1 |
| SCCCST1008F01.g | GS1_SS_02325_00892 | Unknown                         | Uncharacterized      |                      |                                                                  | unknown [Zea mays]                                                       |  | down (-3.7000,-5.3300) |                        | 0 | 1 | 0 | 1 |
| SCVPCL6061B12.g | GS1_SS_15679_05046 | Unknown                         | zinc-binding protein |                      | Uncharacterized RING finger protein C2F3.16                      | unknown [Zea mays]                                                       |  | up (3.8100,5.5200)     | up (5.5600,5.2700)     | 2 | 0 | 0 | 2 |
| SCQGHR1011A04.g | GS1_SS_25114_09855 | Unknown                         |                      |                      | O-acyltransferase WSD1 OS=Arabidopsis thaliana GN=WSD1 PE=2 SV=1 | hypothetical protein Osl_003506 [Oryza sativa (japonica cultivar-group)] |  | up (2.5200,2.9400)     |                        | 1 | 0 | 0 | 1 |
| SCMCRT2107F12.g | GS1_SS_15529_12941 | Unknown                         |                      |                      |                                                                  | unknown [Zea mays]                                                       |  |                        | down (-3.8600,-2.9800) | 0 | 1 | 0 | 1 |
| SCBFAM2023B06.g | GS1_SS_26061_07590 | Unknown                         |                      |                      |                                                                  | hypothetical protein LOC100194285 [Zea mays] unknown [Zea mays]          |  |                        | down (-3.8700,-4.6900) | 0 | 1 | 0 | 1 |
| SCCCST2004B02.g | GS1_SS_18321_11168 | Unknown                         |                      |                      |                                                                  | unknown [Zea mays]                                                       |  | down (-3.1800,-3.1400) |                        | 0 | 1 | 0 | 1 |
| SCEZLB1012B01.g | GS1_SS_09214_14042 | Unknown                         |                      |                      |                                                                  | hypothetical protein Osl_013071 [Oryza sativa (japonica cultivar-group)] |  | down (-4.1700,-3.8800) | down (-3.0500,-3.9200) | 0 | 2 | 0 | 2 |
| SCEQRZ3092B09.g | GS1_SS_15512_10419 | Unknown                         |                      |                      |                                                                  | hypothetical protein Osl_028671 [Oryza sativa (japonica cultivar-group)] |  | down (-5.3800,-7.7300) |                        | 0 | 1 | 0 | 1 |
| SCBFSD1038F10.g | GS1_SS_25371_03932 | Unknown                         |                      |                      |                                                                  | hypothetical protein Osl_022788 [Oryza sativa (japonica cultivar-group)] |  |                        | up (2.8200,5.1900)     | 1 | 0 | 0 | 1 |
| SCSGCL6072C01.g | GS1_SS_06974_02509 | Unknown                         |                      |                      |                                                                  |                                                                          |  |                        | up (3.3100,5.6000)     | 1 | 0 | 0 | 1 |
| SCBGFL5077B07.g | GS1_SS_23640_09836 | Unknown                         |                      |                      |                                                                  |                                                                          |  | down (-2.4700,-4.0600) |                        | 0 | 1 | 0 | 1 |
| SCMCAM2083C12.g | GS1_SS_04503_10804 | Unknown                         |                      |                      |                                                                  | hypothetical protein Osl_025460 [Oryza sativa (japonica cultivar-group)] |  |                        | up (5.1000,5.1800)     | 1 | 0 | 0 | 1 |
| SCJFRZ2015B01.g | GS1_AS_14889_18273 | Unknown                         |                      | No matches           |                                                                  |                                                                          |  |                        | up (3.5500,4.3400)     | 1 | 0 | 0 | 1 |
| SCRFAM2071G07.g | GS1_SS_04475_11606 | Unknown                         |                      |                      |                                                                  | Os02g0617700 [Oryza sativa (japonica cultivar-group)]                    |  |                        |                        |   |   |   |   |
| SCEQLB1063H04.g | GS1_SS_09094_13039 | Unknown                         |                      |                      |                                                                  | Os02g0617700 [Oryza sativa (japonica cultivar-group)]                    |  | down (-2.1700,-4.1400) |                        | 0 | 1 | 0 | 1 |
| SCEPSB1135D05.g | GS1_SS_21061_13273 | Unknown                         |                      |                      |                                                                  | unknown [Zea mays]                                                       |  | down (-4.5200,-5.6800) |                        | 0 | 1 | 0 | 1 |
| SCCCLR2C02G11.g | GS1_SS_18193_12935 | Unknown                         |                      |                      |                                                                  | hypothetical protein LOC100193109 [Zea mays] unknown [Zea mays]          |  | up (6.2300,4.0900)     | up (5.0400,4.1800)     | 2 | 0 | 0 | 2 |
| SCEQRT2091H09.g | GS1_SS_13053_10192 | Unknown                         |                      |                      |                                                                  | unknown [Zea mays]                                                       |  |                        | down (-3.7800,-4.1600) | 0 | 1 | 0 | 1 |
| SCCART1003B05.g | GS1_SS_11724_09775 | Unknown                         |                      |                      |                                                                  | unknown [Zea mays]                                                       |  |                        | up (4.4300,5.4100)     | 1 | 0 | 0 | 1 |
| SCCCRZ2002F11.g | GS1_SS_11680_09616 | Unknown                         |                      |                      |                                                                  |                                                                          |  |                        | up (2.8500,5.3500)     | 1 | 0 | 0 | 1 |
| SCJFRT2059C10.g | GS1_SS_05003_12892 | Unknown                         |                      |                      |                                                                  | unknown [Zea mays]                                                       |  | down (-4.2300,-6.3500) |                        | 0 | 1 | 0 | 1 |
| SCSBLB2040H08.g | GS1_AS_24760_01971 | Unknown                         |                      |                      |                                                                  | unknown [Zea mays]                                                       |  |                        | down (-5.9800,-3.6200) | 0 | 1 | 0 | 1 |
| SCBFSD2034D05.g | GS1_SS_25882_10615 | Unknown                         |                      |                      | Uncharacterized protein At3g15000, mitochondrial                 | unknown [Zea mays]                                                       |  | up (3.4400,3.1600)     | up (3.8400,4.0100)     | 2 | 0 | 0 | 2 |
| SCCCLR2004H02.g | GS1_SS_16640_12236 | Unknown                         |                      |                      |                                                                  | hypothetical protein LOC100191649 [Zea mays] unknown [Zea mays]          |  | down (-3.0400,-4.4600) |                        | 0 | 1 | 0 | 1 |
| SCCCRZ2C01H11.g | GS1_AS_21744_06635 | Unknown                         |                      |                      |                                                                  |                                                                          |  |                        | down (-4.9900,-4.4200) | 0 | 1 | 0 | 1 |
| SCEZRT2021G08.g | GS1_SS_13248_09439 | Unknown                         |                      |                      |                                                                  |                                                                          |  |                        | down (-2.9400,-4.6700) | 0 | 1 | 0 | 1 |
| SCEZRZ3099D10.g | GS1_SS_02714_09706 | Unknown                         |                      |                      |                                                                  |                                                                          |  |                        | up (6.0800,7.9400)     | 1 | 0 | 0 | 1 |
| SCQSRT2033E01.g | GS1_SS_16543_17072 | Vitamin and Cofactor metabolism | Transferase family   | Secondary metabolism | putative nicotinate phosphoribosyltransferase                    | unknown [Zea mays]                                                       |  | down (-3.2800,-5.3400) | up (4.9900,5.3600)     | 1 | 1 | 0 | 2 |
| SCQSRT2033E01.g | GS1_SS_16543_17072 | Vitamin and Cofactor metabolism | Transferase family   | Secondary metabolism | putative nicotinate phosphoribosyltransferase                    | unknown [Zea mays]                                                       |  | up (1.8200,2.6800)     |                        | 1 | 0 | 0 | 1 |

Log ratio are shown for replicates
