# Supplementary material for: Identification of sense and antisense transcripts regulated by drought in sugarcane
Source: PubMed Central journal article supplement (PMC3369129; doi:10.1007/s11103-012-9922-1), 2012-05-19
Supplement: 11103_2012_9922_MOESM5_ESM.pdf [file 11103_2012_9922_MOESM5_ESM.pdf]

**IDENTIFICATION OF SENSE AND ANTISENSE TRANSCRIPTS REGULATED BY DROUGHT IN SUGARCANE Plant Molecular Biology**

Carolina Gimiliani Lembke<sup>\*1</sup>, Milton Yutaka Nishiyama Jr<sup>\*1</sup>, Paloma Mieko Sato<sup>1</sup>, Rodrigo Fandiño de Andrade<sup>1</sup>, Glaucia Mendes Souza<sup>1#</sup>

<sup>1</sup>Laboratório de Transdução de Sinal, Departamento de Bioquímica, Instituto de Química, Universidade de São Paulo.

<sup>#</sup>Corresponding author e-mail address: glmouza@iq.usp.br

**Electronic Supplementary Table 5 – qPCR validation of differentially expressed sense and antisense transcripts.**

| SAS             | Functional Category                  | Structural Category   | Gene Name                               | Oligo info                               | qPCR primers efficiency | 24h drought |         | 72h drought                                        |                                                    | 120h drought |         | 24h control |         | 72h control |         | 120h control |         |
|-----------------|--------------------------------------|-----------------------|-----------------------------------------|------------------------------------------|-------------------------|-------------|---------|----------------------------------------------------|----------------------------------------------------|--------------|---------|-------------|---------|-------------|---------|--------------|---------|
|                 |                                      |                       |                                         |                                          |                         | drought     | drought | drought                                            | drought                                            | drought      | drought | drought     | drought | drought     | drought | drought      | drought |
| SCBGST3105A06.g | Carbohydrate metabolism              | kinase/phosphatase    | Fructose-1,6-bisphosphatase I           | GS1_SS_18508_15468<br>GS1_AS_18508_15469 | 96,5                    |             |         | up<br>(4.670,2.360)                                | down<br>(-3.240,-5.140)<br>down<br>(-2.730,-3.120) |              |         |             |         |             |         |              |         |
| SCJFLR1017E09.g | Carbohydrate metabolism              | synthase              | Alpha galactosidase 1                   | GS1_SS_08724_06083<br>GS1_AS_08724_06084 | 102,2                   |             |         | up<br>(4.230,3.910)                                | up<br>(3.960,4.490)                                |              |         |             |         |             |         |              |         |
| SCJFRZ2014D06.g | DNA metabolism                       | transcription factor  | ATAF1 Protein                           | GS1_SS_12278_15377<br>GS1_AS_12278_15378 | 95,3                    |             |         | up<br>(3.750,3.020)                                | up<br>(5.120,3.640)                                |              |         |             |         |             |         |              |         |
| SCCCLR1075B06.g | Light Harvesting                     | others                | Photosystem II 10kDa polypeptide        | GS1_SS_10234_14797<br>GS1_AS_10234_14796 | 93,1                    |             |         | up<br>(8.230,5.400)                                | up<br>(3.150,3.750)                                |              |         |             |         |             |         |              |         |
| SCOGLR1085G01.g | Light Harvesting                     | photosystem I subunit | Photosystem I reaction center subunit V | GS1_SS_25636_20097<br>GS1_AS_25636_20096 | 93,1                    |             |         |                                                    | down<br>(-5.240,-6.890)<br>down<br>(-4.240,-3.990) |              |         |             |         |             |         |              |         |
| SCACLR1057H07.g | Porphyrin and chlorophyll metabolism | others                | Magnesium chelatase subunit Chl         | GS1_SS_04477_20876<br>GS1_AS_04477_20877 | 96,1                    |             |         | down<br>(-3.920,-7.360)                            | down<br>(-7.620,-8.400)                            |              |         |             |         |             |         |              |         |
| SCJLRT1016G06.g | RNA metabolism                       | hydrolase             | Ribonuclease                            | GS1_SS_12487_19039<br>GS1_AS_12487_19040 | 98,4                    |             |         | up<br>(5.650,3.540)                                | up<br>(2.990,3.220)                                |              |         |             |         |             |         |              |         |
| SCBFLR1026B07.g | RNA metabolism                       | RNA binding protein   | Nucleolar protein Nop56                 | GS1_SS_24393_15654<br>GS1_AS_24393_15653 | 110,7                   |             |         | down<br>(-2.670,-4.480)<br>down<br>(-2.830,-3.450) | down<br>(-2.670,-4.480)                            |              |         |             |         |             |         |              |         |

The Table indicates gene expression level in Oligoarray and qPCR experiments. In the Oligoarray column are indicated log ratios from the two biological replicates and in the qPCR columns are indicated the level of expression using control sample as reference and +error and -error values.
