# Supplementary material for: Identification of sense and antisense transcripts regulated by drought in sugarcane
Source: PubMed Central journal article supplement (PMC3369129; doi:10.1007/s11103-012-9922-1), 2012-05-19
Supplement: 11103_2012_9922_MOESM6_ESM.pdf [file 11103_2012_9922_MOESM6_ESM.pdf]

## IDENTIFICATION OF SENSE AND ANTISENSE TRANSCRIPTS REGULATED BY DROUGHT IN SUGARCANE

### Plant Molecular Biology

Carolina Gimiliani Lembke\*<sup>1</sup>, Milton Yutaka Nishiyama Jr\*<sup>1</sup>, Paloma Mieko Sato<sup>1</sup>, Rodrigo Fandiño de Andrade<sup>1</sup>, Glaucia Mendes S

<sup>1</sup>Laboratório de Transdução de Sinal, Departamento de Bioquímica, Instituto de Química, Universidade de São Paulo.

#Corresponding author e-mail address: glmsouza@iq.usp.br

**Supplementary Table 6 – Primer sequences for qPCR validation of differentially expressed transcripts.**

| SAS             | Forward primer name | Forward primer sequence   | Reverse primer name | Reverse primer sequence      |
|-----------------|---------------------|---------------------------|---------------------|------------------------------|
| SCACAD1037B06.g | Fw 1037B06RT        | GCATCCTCACCAGGCTTGAA      | Rv 1037B06RT        | GAGGATCCACCGCAGCAA           |
| SCEPRT2048D06.g | Fw 2048D06RT        | GGAAGGCGTGGCTGATGA        | Rv 2048D06RT        | GTACGGTGATGCTGCAATCG         |
| SCUTAM2089E05.g | Fw 2089E05RT        | TACGACTGGAGCGCCTACAA      | Rv 2089E05RT        | TGATGGCCTGCAGCTTGAG          |
| SCCFL4002D04.g  | Fw 4002D04RT        | CGAGGTGCTGATCATTGTCAA     | Rv 4002D04RT        | AGGATGCTTTACTCCCTAGTGGAA     |
| SCEZLB1006F11.g | Fw 1006F11RT        | GGAATTGCAGATGCTGGAACA     | Rv 1006F11RT        | TGTTGTCATTGCTGATAAGTTTGC     |
| SCCCL5003D05.g  | Fw 5003D05RT        | TTAGAGGGCGAGGCAGGTT       | Rv 5003D05RT        | GGCAGCTATGATGCTTCAAGAA       |
| SCCCL3140E02.g  | Fw 3140E02RT        | GGTAATTACAGCGTTAGGCAACT   | Rv 3140E02RT        | CATGTTGATTGATTACTGTCTGATTG   |
| SCEPLB1041E10.g | Fw 1041E10RT        | TGCTGTTCTTTTGGACGGTACT    | Rv 1041E10RT        | TTCCACCCCTGTTACACCTTAA       |
| SCJFRT1059C11.g | Fw 1059C11RT        | GCGTCGTCGGTTGCTTCT        | Rv 1059C11RT        | AATACAGACGCAAAGTATCATAAGG    |
| SCBGST3105A06.g | Fw 3105A06RT        | CGGGTCCAAGAACGAGATCA      | Rv 3105A06RT        | AGCCTGGACGAGCCGTAGA          |
| SCJFLR1017E09.g | Fw1017E09RT         | CGCGGCTGAGCCATTCT         | Rv1017E09RT         | CCCCATCTCTCGTGACAT           |
| SCJFRZ2014D06.g | Fw 2014D06RT        | AAGAACCTCGCCTGTAGGAAATC   | Rv 2014D06RT        | GCTCTGATCCAATCTTCCAATAATC    |
| SCCCLR1075B06.g | Fw 1075B06RT        | TCCAACATCCCAGCCTTTC       | Rv 1075B06RT        | TGCATCAACACCATCCTCAA         |
| SCQGLR1085G01.g | Fw 1085G01RT        | GGATACGACCCCAACTTCTTCTG   | Rv 1085G11RT        | AACGGAGTAGAATAACAAGCTCAAGAAC |
| SCACLR1057H07.g | Fw 1057H07RT        | CTACTGTCATTCCAAACTGCTTGAG | Rv 1057H07RT        | AGCAAACCCGAGTCAATGGAT        |
| SCJLRT1016G06.g | Fw 1016G06RT        | CGAGTCCCAGGCGTTCTA        | Rv 1016G06RT        | TTGCAGAGAATTGGACAACCTGA      |
| SCBFLR1026B07.g | Fw 1026B07RT        | AGAGGATGCACAGGAGGAGAAC    | Rv 1026B07RT        | TGGGAGTCTCGGTCTCTCAG         |
